# Supplementary material for: Does intensive glycaemic control promote healing in diabetic foot ulcers? – a feasibility study
Source: PubMed Central journal article supplement — BMJ Open. 2020 Jan 20;10(1):e029009. doi: 10.1136/bmjopen-2019-029009 (PMC7044945; doi:10.1136/bmjopen-2019-029009), 2020-01-20
Supplement: bmjopen-2019-029009.draft_revisions.pdf [file bmjopen-2019-029009.draft_revisions.pdf]

# BMJ Open

BMJ Open is committed to open peer review. As part of this commitment we make the peer review history of every article we publish publicly available.

When an article is published we post the peer reviewers' comments and the authors' responses online. We also post the versions of the paper that were used during peer review. These are the versions that the peer review comments apply to.

The versions of the paper that follow are the versions that were submitted during the peer review process. They are not the versions of record or the final published versions. They should not be cited or distributed as the published version of this manuscript.

BMJ Open is an open access journal and the full, final, typeset and author-corrected version of record of the manuscript is available on our site with no access controls, subscription charges or pay-per-view fees (<http://bmjopen.bmj.com>).

If you have any questions on BMJ Open's open peer review process please email [editorial.bmjopen@bmj.com](mailto:editorial.bmjopen@bmj.com)

# BMJ Open

## Does intensive glycaemic control promote healing in diabetic foot ulcers? A feasibility study

|                               |                                                                                                                                                                                                                                                                                                                                                                                                                                                 |
|-------------------------------|-------------------------------------------------------------------------------------------------------------------------------------------------------------------------------------------------------------------------------------------------------------------------------------------------------------------------------------------------------------------------------------------------------------------------------------------------|
| Journal:                      | <i>BMJ Open</i>                                                                                                                                                                                                                                                                                                                                                                                                                                 |
| Manuscript ID                 | bmjopen-2019-029009                                                                                                                                                                                                                                                                                                                                                                                                                             |
| Article Type:                 | Original research                                                                                                                                                                                                                                                                                                                                                                                                                               |
| Date Submitted by the Author: | 08-Jan-2019                                                                                                                                                                                                                                                                                                                                                                                                                                     |
| Complete List of Authors:     | Dissanayake, Ajith; Counties Manukau Health, Endocrinology<br>Vandal, Alain; Auckland University of Technology, Faculty of Health and Environmental Sciences; Counties Manukau Health, Ko Awatea Park, Diane; Auckland University of Technology, Faculty of Health and Environmental Sciences<br>Milne, Bobbie; Middlemore Clinical Trials<br>Grech, Roger; Counties Manukau Health, Podiatry<br>Ng, Anthony; Counties Manukau Health, Podiatry |
| Keywords:                     | Diabetic foot < DIABETES & ENDOCRINOLOGY, WOUND MANAGEMENT, STATISTICS & RESEARCH METHODS                                                                                                                                                                                                                                                                                                                                                       |
|                               |                                                                                                                                                                                                                                                                                                                                                                                                                                                 |

SCHOLARONE™  
Manuscripts

**TITLE**

Does intensive glycaemic control promote healing in diabetic foot ulcers? A feasibility study

**AUTHOR DETAILS**

Ajith Dissanayake\*

Consultant endocrinologist, Counties Manukau District Health Board

Alain C. Vandal\*

Associate Professor, Faculty of Health and Environmental Sciences

Auckland University of Technology

Diane Park

Research Assistant, Faculty of Health and Environmental Sciences

Auckland University of Technology

Bobbie Milne

Research Nurse, Middlemore Clinical Trials

Roger Grech

Podiatrist, Counties Manukau District Health Board

Anthony Ng

Podiatrist, Counties Manukau District Health Board

\* A. Dissanayake and A.C. Vandal should be considered joint lead authors

**CORRESPONDING AUTHOR**

Associate Professor Alain C. Vandal

PO Box 93311

Research and Evaluation Office, Ko Awatea, Counties Manukau Health,  
Otahuhu, Auckland, New Zealand.

Tel: +64 9 921 9999 ext 7726

Email: [alain.vandal@aut.ac.nz](mailto:alain.vandal@aut.ac.nz)

**WORD COUNT**

333 (Abstract)

3152 (Main text)

**ABBREVIATED TITLE**

Glycaemic control for diabetic foot ulcers

## ABSTRACT

**Introduction** One in four diabetes patients will develop a foot ulcer over their lifetime. The role of glycaemic control in diabetic foot ulcer healing is not supported by randomised controlled trial (RCT) data.

**Objectives:** To determine the feasibility of an RCT of glycaemic control with intensive insulin therapy in diabetic foot ulcer, by assessing: entry criteria; adherence to control regimen; medication satisfaction; sensitivity of different ulcer-healing endpoints to glycaemic control.

**Design** Two substudies: one cross-sectional, one single-arm prospective.

**Setting** Single-centre secondary care diabetic foot clinic in New Zealand.

**Participants** Substudy 1: 78 participants consisting of all people  $\geq 18$  years with a diabetic foot ulcer presenting to the clinic over 35 weeks in 2015. Substudy 2: 15 participants from Substudy 1 consenting to intensive insulin therapy.

**Intervention** Substudy 1: none. Substudy 2: Intensive insulin therapy with standard podiatry care over 24 weeks.

**Outcome measures** Substudy 1: Proportion of participants satisfying potential RCT entry criteria; medication satisfaction (DiabMedSat). Substudy 2: Fasting capillary blood sugar (FCBS); index ulcer healing time; index ulcer size; health-related quality of life (HRQoL; EQ-5D-5L and DFS-SF).

**Results** Proportion in Substudy 1 satisfying all entry criteria was 31% (95% CI 21 to 42). FCBS values decreased between baseline and study end (difference -3.7 mmol/L, 95% CI -6.5 to -0.8), suggesting adherence to control regimen; 83% (95% CI 44 to 95) of ulcers healed by 24 weeks. FCBS correlated negatively with medication satisfaction. Ulcer area logarithm was most sensitive to FCBS changes, displaying significant negative correlation with HRQoL outcomes. Detecting a 30%

1  
2  
3 between-group difference in this outcome (80% power,  $\alpha=5\%$ ) requires 220  
4  
5 participants per arm, achievable within 1 year with 15 centres similar to study setting.  
6

7  
8 **Conclusions** An adequately powered RCT requires co-operation between a large  
9  
10 number of centres. Ulcer area logarithm should be primary endpoint.  
11

12 **Trial registration** ANZCTR ACTRN12617001414303  
13  
14

## 15 16 17 **Strengths and limitations of this study** 18

- 19  
20 • First study in 15 years to examine the feasibility of a definitive randomised  
21  
22 controlled trial (RCT) of intensive insulin therapy for diabetic foot ulcers.  
23
- 24 • Use of imaging techniques allowed assessment of various ulcer-size-related  
25  
26 outcomes as potential primary endpoints for an RCT.  
27
- 28 • The target sample size of 20 for Substudy 2, examining the relationship  
29  
30 between ulcer healing and glycaemic control, was not achieved during the  
31  
32 study period.  
33
- 34 • The study was conducted in a single centre in New Zealand, limiting  
35  
36 generalisability to other populations and settings with different pathways for  
37  
38 diabetes and diabetic complications.  
39  
40  
41  
42  
43  
44

## 45 **KEYWORDS**

46  
47 Diabetic Foot  
48  
49 Blood Glucose  
50  
51 Wound Healing  
52  
53 Outcome Assessment (Health Care)  
54  
55 Sample Size  
56  
57  
58  
59  
60

## Introduction

One in four diabetes patients will develop a foot ulcer in their lifetime [1]. Diabetic foot ulcer is one of the most significant complications of diabetes [1-4] and often responds poorly to treatment, with only one-third of those managed in secondary care healing by 3 months and one-half at 6 months [5]. Non-healing ulcers are an important cause of lower extremity amputation. Most notable causes of foot ulceration are peripheral neuropathy, peripheral vascular disease and structural foot disease [6] [7]. These factors are linked to hyperglycaemia [8-10] and pathological states associated with diabetes.

A meta-analysis of nine randomised controlled trials in nearly 11,000 participants showed that intensive glycaemic control potentially improved the incidence of diabetic foot ulcer, decreased the risk of amputation and improved sensory nerve function compared with less intensive control [11]. As a result, clinical practice guidelines from the Society for Vascular Surgery, American Podiatric Medical Association, and Society for Vascular Medicine now recommend adequate glycaemic control (glycosylated haemoglobin [HbA1c] <53 mmol/mol) to reduce the incidence of diabetic foot ulcers [1].

The evidence that improved glycaemic control can accelerate the healing of foot ulcers and reduce the incidence of ulceration and amputation remains observational [11-17]. There is no randomised trial evidence that tight glycaemic control improves ulcer wound healing [18]. A previous feasibility study in this area [19] concluded 15 years ago that a definitive randomised trial in this area was not feasible, possibly due to exacting entry criteria. To investigate further whether a randomised controlled trial (RCT) evaluating the efficacy of intensive insulin therapy on diabetic foot ulcer healing is possible, this two-part feasibility study sought appropriate but less

1  
2  
3 stringent trial entry criteria to improve accrual rates (Substudy 1) and sought  
4 appropriate endpoints for such a trial (Substudy 2). In Substudy 2, presence or  
5 absence of peripheral neuropathy, peripheral vascular disease and foot deformities  
6 were noted as they were identified factors in the genesis of diabetic foot ulcers. Data  
7 on microcirculation in the feet were also collected using novel laser imaging  
8 technology. This report focuses on data from Substudy 1 and Substudy 2; the laser  
9 imaging data analysis will be reported separately.

10  
11  
12  
13  
14  
15  
16  
17  
18  
19 The primary objective of Substudy 1 was to estimate the proportion of participants  
20 satisfying the entry criteria for the planned RCT. Entry criteria used in the previous  
21 feasibility study [19] were revised as follows: removing the requirement for chronic  
22 ulcers (>4 weeks); removing the ulcer size criterion (25-2500 mm<sup>2</sup>), and including  
23 participants with a higher HbA1c ( $\geq 58$  mmol/mol), renal disease and/or a history of  
24 hypoglycaemia. Secondary objectives were to estimate the length of the recruitment  
25 period for the intended RCT, and determine participant satisfaction with their  
26 diabetes medication.

27  
28  
29  
30  
31  
32  
33  
34  
35  
36  
37  
38 In Substudy 2, the main objective was to determine a primary endpoint for the RCT  
39 by analysing sensitivity of ulcer healing-related outcomes (ulcer area, change in  
40 ulcer area, and time to complete healing) to glycaemic control accounting for  
41 standard podiatry care. The ulcer healing outcome measure with the best  
42 association with glycaemic control was to be assessed for convergent validity with an  
43 established foot ulcer scale. Secondary objectives included examining the  
44 relationship between adherence (using glycaemic control as proxy), as well as  
45 attendance, and satisfaction with diabetes medication, and evaluating health-related  
46 quality of life (HrQOL) measures in this population.



## Materials and methods

### Setting and Study Design

The study was conducted at the Counties Manukau Health (CMH) Diabetes Foot Clinic in Auckland, New Zealand between February and October 2015, with Substudy 2 follow-up to February 2016. Substudy 1 was a cross-sectional study enrolling all people aged  $\geq 18$  years with diabetes and a current foot ulcer presenting at the CMH Diabetes Foot Clinic over a period of 24 weeks. Substudy 2 was a single-arm interventional study enrolling Substudy 1 participants meeting all entry criteria (Table 1) and treating them with intensive insulin therapy for 24 weeks. The protocol was approved by the New Zealand Northern A Health and Disability Ethics Committee (ref: 14/NTA/195). All participants provided informed written consent.

### Accrual periods and sample size

The accrual period for Substudy 1 (35 weeks) was selected as long as possible while respecting contractual obligations with the study funder. To distinguish between recruitment of existing patients and new patients, we prospectively defined two recruitment periods. The first period of recruitment (Period A) was to finish from the moment at which only newly enrolled clinic patients started to be recruited in the study, giving way to Period B.

Substudy 2 aimed to recruit 20 participants. Assuming 10% attrition, this number is sufficient to estimate the standard deviation of a continuous variable (e.g. ulcer area) with a coefficient of variation inferior to 0.2. This criterion is consistent with the goal of identifying a sensitive primary endpoint endowed with good precision.

<<Table 1 approximately here>>

## Study procedures and outcomes

Substudy 1 participants completed a Diabetes Medication Satisfaction (DiabMedSat) questionnaire [20 21]. Their foot wound(s) (index ulcers) were inspected, and entry criteria status (Table 1) and demographic data recorded. In Substudy 2, visits occurred weekly between weeks 1 (baseline) and 4, then at 6, 8, 12, 16, 20 and 24 weeks, or until the index ulcers healed. The following were undertaken at each visit: ulcer examination: digital photographic planimetry of ulcer area (using the SilhouetteStar camera, ARANZ Medical, New Zealand); FCBS measurement (in mmol/L); medication review; and adverse events assessment. FCBS was used in the analyses as a measure of glycaemic control and as a proxy for adherence. HbA1c was assessed at baseline and at the end of trial, providing an assessment of chronic hyperglycaemia. By contrast, fasting capillary glucose or mean daily capillary glucose may provide evidence of acute improvement of glycaemia in a short-term clinical trial [18]. In addition, participants completed three questionnaires at each visit: DiabMedSat [20 21], EuroQol 5 Dimensions 5 Levels (EQ-5D-5L) [22 23] and Diabetic Foot Ulcer Scale-Short Form (DFS-SF) [24].

## Intervention

On entry to Substudy 2, intermediate- or long-acting insulin was initiated or adjusted, and given in addition to usual oral hypoglycaemic tablet therapy, consistently with international guidelines [25]. Short-acting mealtime insulin was provided as appropriate. The goal was to maintain FCBS at 4–7 mmol/L, with  $\leq 2$  episodes of mild hypoglycaemia per week.

Substudy 2 participants received usual podiatry care at each visit, including ulcer debridement, orthotics prescription and adjustments, antibiotics if indicated and education.

## Statistical analyses

### *Substudy 1*

Descriptive statistics were produced for participant demographic characteristics, recruitment rate, entry criteria fulfilment and DiabMedSat subscores. Multivariate analysis of variance (MANOVA) was used to detect differences in subscores based on demographic or participant characteristics. A Poisson exact test was used to compare recruitment rates over two recruitment periods and mixed logistic regression used to compare differences in entry criteria fulfilment between the periods. Indicators of criterion satisfaction were fitted jointly by themselves in a first model, and interacting with period in a second model. Models were compared using deviance tests.

### *Substudy 2*

The analysis set for this feasibility study consisted of all participants having initiated treatment. All analyses were carried out on the index ulcers, present at the first visit. All participants had a single index ulcer.

Linear mixed models were used to determine the relationship between four different ulcer area-related outcomes at each visit (ulcer area in cm<sup>2</sup>, log[ulcer area+0.01], absolute and relative rates of change in ulcer area) and glycaemic control. (The value of 0.01 in the logarithmic endpoint was chosen based on the data to improve the normality of the outcome.) FCBS was the fixed effect and participant the random effect. Time-to-healing was considered as a fifth possible outcome. A Kaplan-Meier estimate of ulcer persistence probability was produced and Cox regression used to estimate the hazard ratio of ulcer healing under changes in FCBS, taken as a time-dependent covariate. Time- and/or baseline ulcer area-adjusted estimates, as well as unadjusted estimates, were produced to assess potential confounding, as tight

1  
2  
3 management in a foot clinic may promote ulcer healing in several ways. The most  
4 sensitive outcome was selected by consideration of its adjusted observed  
5 significance level and its equivalent Cohen's effect size where appropriate. To  
6 estimate correlations and their 95% confidence intervals (CI) using all available  
7 longitudinal data, we fitted outcomes jointly using a heterogeneous compound  
8 symmetry covariance model, and using only intercepts as fixed effects. We thus  
9 obtained correlations between DFS-SF subscores and selected ulcer healing  
10 outcome; between DiabMedSat subscores and FCBS; and between DFS-SF  
11 subscores and EQ-5D-5L.  
12  
13

14 Descriptive statistics were produced on completed follow-ups (defined as healing  
15 before 24 weeks or attending the 24-week visit) and attended visits. Attendance  
16 probability was regressed on the most recently available FCBS, measure of ulcer  
17 area and DiabMedSat subscores using mixed logistic regression. The final  
18 attendance model was selected using AIC.  
19  
20

21 No data were missing for time-to-healing analyses. Other analyses all involved  
22 mixed models on longitudinal data, known to alleviate selection bias due to  
23 missingness [26].  
24  
25

## 26 Results

### 27 Participants

28 <<Table 2 approximately here.>>  
29

30 Seventy-eight participants (all unique clinic visitors during the recruitment period)  
31 were enrolled in Substudy 1 (Table 2). Mean age was 57 years (SD 14). The majority  
32 were men and most were of Pacific or European ethnicity. No data were missing for  
33 Substudy 1. All participants were identified as having some measure of foot  
34 deformity, judged unlikely to affect ulcer healing by the treating podiatrists. However,  
35  
36  
37  
38  
39  
40  
41  
42  
43  
44  
45  
46  
47  
48  
49  
50  
51  
52  
53  
54  
55  
56  
57  
58  
59  
60

1  
2  
3 no objective measure of foot deformity, to our knowledge, has been assessed for  
4  
5 association with ulcer healing.  
6

7  
8 Seventeen participants entered Substudy 2. One withdrew consent after Visit 1 and  
9  
10 another was healed on Visit 1, leaving 15 participants in the analysis set, assessed  
11  
12 on a total of 90 occasions.  
13

### 14 15 **Completeness**

16  
17 Two participants with unhealed ulcers did not attend the 24-week visit (13%, 95% CI  
18  
19 2 to 40). Of the 102 scheduled visits, 12 were missed, yielding an attendance  
20  
21 proportion of 91% (95% CI 79 to 96), accounting for clustering by participant.  
22

23  
24 Average follow-up time to healing or last visit was 17.6 weeks (SD 7.8). Clinical  
25  
26 constraints or patient choice prevented some measurements from being taken,  
27  
28 yielding completeness proportions for specific outcomes between 78% (DiabMedSat  
29  
30 and FCBS) and 85% (ulcer area).  
31  
32

### 33 34 **Recruitment rate and entry criteria**

35  
36  
37 Period A (as defined earlier) finished after 6 weeks, and was the most active with 42  
38  
39 participants recruited compared with 36 participants over the remaining 29 weeks,  
40  
41 forming Period B.  
42

43  
44 All participants satisfied criterion IC1, 78.2% met IC2, 98.7% met IC3, 73.1% met  
45  
46 IC4 and 57.7% met IC5. Twenty-four participants (30.8%, 95% CI 20.8 to 42.2) met  
47  
48 all criteria. Removal of any single criteria increased eligibility proportion appreciably  
49  
50 only in the case of IC2 (to 37.2%, 95% CI 26.5 to 48.9) and IC5 (to 38.5%, 95% CI  
51  
52 27.7 to 50.2). The probabilities of participants meeting entry criteria differed between  
53  
54 periods A and B (Fig. 1); the criterion-period interaction term was significant  
55  
56 ( $P=0.009$ ). The A-to-B rate ratio of eligibility to a full study was 4.1 (95% CI 1.8 to  
57  
58  
59  
60

1  
2  
3 9.2). The eligibility rate in period B was 0.45 participant per week (95% CI 0.24 to  
4  
5 0.77).  
6

7 <<Figure 1 approximately here.>>  
8  
9

### 10 **Diabetes Medication Satisfaction**

11  
12  
13 Higher scores on the DiabMedSat subscales indicate increased satisfaction for all  
14  
15 three subscales. The subscale histograms are displayed in Figure 2. Median score  
16  
17 for the Efficacy subscale was 63.3 (interquartile range [IQR] 26.7), and was  
18  
19 numerically lower than those of the Burden (81.8 [IQR 22.8]) and Symptom  
20  
21 subscales (80.0 [IQR 16.0]). MANOVA demonstrated no significant variation in  
22  
23 subscale scores based on ethnicity, sex or diabetes duration, but there was  
24  
25 significant variation in the Burden ( $P = 0.005$ ) and Symptom ( $P=0.026$ ) scores based  
26  
27 on age (generally higher in older participants).  
28  
29  
30

31 <<Figure 2 approximately here.>>  
32  
33

### 34 **Glycaemic control**

35  
36  
37 FCBS values during the study indicated that participants were generally adhering to  
38  
39 their glycaemic control regimen. Between study end and baseline, the mean  
40  
41 difference in FCBS was -3.7 mmol/L (95% CI -6.5 to -0.8) and in HbA1c was -9.4  
42  
43 mmol/mol (95% CI -19.0 to 0.3).  
44  
45

### 46 **Selection of primary endpoint for RCT**

47 <<Table 3 approximately here.>>  
48  
49

50  
51  
52 Twelve Substudy 2 participants experienced complete healing between weeks 3 and  
53  
54 24; the remaining three had unhealed ulcers at the time of their last visit on or before  
55  
56 week 24. Median ulcer-healing time was 7 weeks. The Kaplan-Meier estimate of the  
57  
58 proportion of ulcers not healing by week 24 was 16.7% (95% CI 5.0 to 56.1). The Cox  
59  
60

1  
2  
3 model showed no significant association between time to ulcer healing and FCBS  
4  
5 (Table 3).

6  
7 Log(ulcer area in  $\text{cm}^2+0.01$ ) (hereafter “log of ulcer area”) and ulcer area absolute  
8  
9 rate of change were the only ulcer healing outcomes sensitive to change in FCBS  
10  
11 (Table 3). The former was selected as most sensitive to changes in FCBS, with  
12  
13 effect size of 0.08 per mmol/L increase in FCBS, adjusted for both time and baseline  
14  
15 value. Time adjustment was intended to account for non-glycaemia-related  
16  
17 improvements and interventions such as podiatric care. Between- and within-  
18  
19 participant outcome variances were estimated at 1.3 and 0.4 respectively.  
20  
21  
22

### 23 24 **Validation of selected outcome with QOL measures**

25  
26 <<Table 4 approximately here.>>  
27

28  
29 DFS-SF scores tended to increase over time (i.e. improved HrQOL); increases  
30  
31 reached statistical significance for four of the six subscales (Leisure [ $P=0.05$ ],  
32  
33 Dependence [ $P=0.01$ ], Negative emotion [ $P=0.001$ ] and Worried about ulcers  
34  
35 [ $P=0.04$ ]). All six subscales showed statistically significant, moderate-to-strong  
36  
37 negative correlation with log of ulcer area (Table 4).  
38  
39

### 40 41 **Participant satisfaction and adherence to intensive insulin therapy**

42  
43 Glycaemia levels displayed weak to moderate negative correlation with the  
44  
45 DiabMedSat scores. The correlation of FCBS with the Burden subscale was -0.35  
46  
47 (95% CI -0.59 to -0.09;  $P=0.01$ ), with the Efficacy subscale -0.42 (95% CI -0.61 to  
48  
49 -0.18;  $P=0.0009$ ) and with the Symptoms subscale -0.21 (95% CI -0.47 to 0.08,  
50  
51  
52  
53  $P=0.15$ ).  
54  
55  
56  
57  
58  
59  
60

## Health-related QOL

The EQ-5D-5L VAS displayed moderate to strong positive correlation with all six DFS-SF subscale scores (Table 4).

## Modelling of attendance

The model explaining attendance with smallest AIC involved the DiabMedSat Burden score only, with an attendance odds ratio of 1.78 (95% CI 1.26 to 2.51;  $P=0.001$ ) per 10-point score increase.

## Discussion

### Key findings

This feasibility study showed that by using less stringent entry criteria, more people with diabetic foot ulcers attending our foot clinic (30%) may be eligible for a proposed RCT investigating the efficacy of an intensive insulin regimen on diabetic foot ulcer healing than reported in a previous feasibility study (0.5% [1/200]) [19]. The study also showed that the primary endpoint of log of ulcer area, with ulcer area measured using digital photographic planimetry, may be sensitive enough to glycaemic control to base an RCT on in this population.

In terms of design and conduct of an RCT of intensive glycaemic control versus standard care in people with diabetic foot ulcers, analysis showed that the largest gains in eligibility from removal of a single criterion would occur by waiving IC2 or IC5. IC5 cannot of course be waived, since participant consent is compulsory in any ethical clinical trial. However if glycaemic control is efficacious in individuals with recently developed diabetes, IC2 could perhaps advantageously be relaxed.

Further findings are indications that acting on the medication burden may improve attendance and that acting on medication satisfaction in general, and satisfaction



1  
2  
3 with efficacy in particular, may improve adherence to the control regimen. In both  
4  
5 cases, however, the evidence obtained is only correlational and not causal.  
6  
7

### 8 **Relationship to other studies**

9  
10 Ulcer healing data suggested an early beneficial effect of intensive insulin therapy;  
11  
12 median healing time was 7 weeks after the initial visit, and by week 21 an estimated  
13  
14 17% of ulcers had not healed. Over a similar timeframe, much lower healing rates  
15  
16 have been reported with standard care (e.g. 31% at 20 weeks in a meta-analysis  
17  
18 [27]). Even when standard care included insulin, a retrospective study found that  
19  
20 only 30% of ulcers had healed after 1.1 months [28]. This result may be due to the  
21  
22 high (weekly) frequency of the first four visits in Substudy 2, allowing more  
23  
24 opportunities for treatment such as wound debridement, and orthotic or medication  
25  
26 adjustments .  
27  
28  
29  
30

### 31 **Implications for a full study**

32  
33 The log of the ulcer area outcome proved sensitive to glycaemic control even  
34  
35 controlling for time since study entry, and was correlated with DFS-SF subscores,  
36  
37 corroborating the validity of the measure. Using this measure as primary endpoint, a  
38  
39 target reduction in ulcer size of 30% would correspond to a 3 mmol/L average  
40  
41 difference in FCBS (corresponding to the difference between the lower bounds of  
42  
43 normal glycaemia and a diagnosis of diabetes), with intensive glycaemic control  
44  
45 versus standard care. In an RCT, 220 participants per arm would be required to  
46  
47 detect a between-group decrease of 30% with 80% power at a 5% significance level.  
48  
49  
50  
51 At the differential eligibility rates observed in both periods and assuming a loss to  
52  
53 follow-up of 10%, such a number could be achieved within about one year if 15  
54  
55 centres similar to ours were recruiting participants.  
56  
57  
58  
59  
60

1  
2  
3 Good reductions in FCBS over the first 4 weeks of intensive insulin therapy were  
4 seen, but more variable levels observed afterwards. To achieve optimal  
5  
6 improvements in glycaemic control over the course of a longer-term RCT more  
7  
8 regular visits may be necessary after the first 4-6 weeks of therapy than were used in  
9  
10 our feasibility study and more daytime FCBS recordings done to optimise therapy.  
11  
12 The EQ-5D VAS appeared to have good convergent validity with the specialised  
13  
14 DFS-SF, indicating its appropriateness as a generic QOL measure in our study  
15  
16 population, opening the door to valid economic analyses. We also realise the  
17  
18 importance of objective quantification of neuropathy, peripheral vascular disease and  
19  
20 foot deformities enabling stratification at randomisation in the larger trial as they are  
21  
22 the most notable causative factors of diabetic foot ulceration [29].  
23  
24

25  
26 Tight glycaemic control relies on long-term patient adherence [1]. Satisfied patients  
27  
28 are more likely to adhere to recommendations regarding not only medication use and  
29  
30 follow-up visits but also dietary habits and physical activity [30]. Our findings showed  
31  
32 that our participants' perception of diabetes medication burden was strongly  
33  
34 associated with adherence and attendance, suggesting that intervening on burden  
35  
36 may promote attendance.  
37  
38  
39  
40  
41

### 42 **Limitations**

43  
44 Some limitations temper the interpretation of our results. Firstly, Substudy 2 did not  
45  
46 reach the target sample size of 20. This shortfall was largely due to availability of  
47  
48 personnel and funder timelines. These issues, particularly around staffing, have the  
49  
50 potential to affect any future RCT. Moreover, the study was conducted at a single  
51  
52 centre in New Zealand, limiting generalisability to other populations and settings with  
53  
54 different care pathways for diabetes and diabetic complications.  
55  
56  
57  
58  
59  
60

## Conclusion

The study has produced evidence of moderate quality that tight glycaemic control may be beneficial for ulcer healing, and that an outcome derived from ulcer area could be sensitive to glycaemic control as expressed by FCBS.

This feasibility study is the first since 2005 to investigate issues relevant to the initiation of a definitive RCT evaluating the impact of intensive insulin therapy on ulcer healing in people with diabetes. The results of such a trial would be useful to inform evidence-based clinical practice guidelines. However, we have also demonstrated that a reasonably powered trial would require the involvement of a large number of centres, increasing the complexity of such an undertaking.

**Acknowledgements** Medical writing assistance was provided by Nicola Ryan, independent medical writer. The authors thank Benjamin Elliott (independent data manager), Lawrence Kingi (podiatrist, Counties Manukau Health) and Dr John Baker (Middlemore Clinical Trials) for their assistance with this study.

**Contributors** A.C.V. and A.D. designed the study and co-wrote the manuscript. A.D. oversaw the intervention and contributed to the discussion. A.C.V. contributed to data management, data monitoring and analysis planning and conduct. D.P. contributed to statistical analyses. B.M. coordinated the research. R.G. and A.N. provided podiatric care and contributed to discussion. A.D. and A.C.V. take responsibility for the contents of the article, study design, access to data and the decision to submit and publish the results.

**Funding** This work was supported by the Health Research Council of New Zealand's Feasibility Study grant number 14/605.

1  
2  
3 **Disclaimer** The joint lead authors A.D. and A.C.V. affirm that the manuscript is an  
4 honest, accurate and transparent account of the study being reported; that no  
5  
6 important aspects of the study have been omitted except as noted in the text, and  
7  
8 that any discrepancies from the study as planned have been explained.  
9  
10

11  
12 **Competing interests** None declared.  
13

14 **Patient consent** Obtained.  
15

16  
17 **Ethics approval** Ethics approval was given for the study by the New Zealand  
18  
19 Northern A Health and Disability Ethics Committee, ethics approval number  
20  
21 14/NTA/195.  
22

23  
24 **Provenance and peer review** Not commissioned; externally peer-reviewed.  
25

26 **Data sharing statement** Data are available. Please contact corresponding author.  
27  
28  
29  
30  
31  
32  
33  
34  
35  
36  
37  
38  
39  
40  
41  
42  
43  
44  
45  
46  
47  
48  
49  
50  
51  
52  
53  
54  
55  
56  
57  
58  
59  
60

## References

1. Hingorani A, LaMuraglia GM, Henke P, et al. The management of diabetic foot: A clinical practice guideline by the Society for Vascular Surgery in collaboration with the American Podiatric Medical Association and the Society for Vascular Medicine. *J Vasc Surg* 2016;**63**(2 Suppl):3s-21s doi: 10.1016/j.jvs.2015.10.003[published Online First: Epub Date]|.
2. Australian Institute of Health and Welfare. Available from: <http://www.aihw.gov.au/WorkArea/DownloadAsset.aspx?id=6442453674>, 2008.
3. Ragnarson Tennvall G, Apelqvist J. Health-economic consequences of diabetic foot lesions. *Clin Infect Dis* 2004;**39** Suppl 2:S132-9 doi: 10.1086/383275[published Online First: Epub Date]|.
4. Stockl K, Vanderplas A, Tafesse E, et al. Costs of lower-extremity ulcers among patients with diabetes. *Diabetes Care* 2004;**27**(9):2129-34
5. Treece KA, Macfarlane RM, Pound N, et al. Validation of a system of foot ulcer classification in diabetes mellitus. *Diabet Med* 2004;**21**(9):987-91 doi: 10.1111/j.1464-5491.2004.01275.x[published Online First: Epub Date]|.
6. Clayton W, Elasy T. A review of the pathophysiology, classification, and treatment of foot ulcers in diabetic patients. *J Clin Diabetes* 2009;**27**(2):52-58
7. Schaper N. Lessons from Eurodiab. *Diabetes Metab Res* 2012;**28**(Suppl 1):21-26
8. Ikem R, Ikem I, Adebayo O, et al. An assessment of peripheral vascular disease in patients with diabetic foot ulcer. *Foot* 2010;**20**(4):114-17
9. Ogbera O, Osa E, Edo A, et al. Common clinical features of diabetic foot ulcers: perspectives from a developing nation. *Int J Low Extr Wound* 2008;**7**(2):93-98
10. Tesfaye S, Slevrajah D. Advances in the epidemiology, pathogenesis and management of diabetic peripheral neuropathy. *Diabetes Metab Res* 2012;**1**(1):8-14
11. Hasan R, Firwana B, Elraiyah T, et al. A systematic review and meta-analysis of glycemic control for the prevention of diabetic foot syndrome. *J Vasc Surg* 2016;**63**(2 Suppl):22S-28S e1-2 doi: 10.1016/j.jvs.2015.10.005[published Online First: Epub Date]|.
12. Brem H, Sheehan P, Rosenberg HJ, et al. Evidence-based protocol for diabetic foot ulcers. *Plast Reconstr Surg* 2006;**117**(7 Suppl):193S-209S; discussion 10S-11S doi: 10.1097/01.prs.0000225459.93750.29[published Online First: Epub Date]|.
13. Christman AL, Selvin E, Margolis DJ, et al. Hemoglobin A1c predicts healing rate in diabetic wounds. *J Invest Dermatol* 2011;**131**(10):2121-7 doi: 10.1038/jid.2011.176[published Online First: Epub Date]|.
14. Lan CC, Liu IH, Fang AH, et al. Hyperglycaemic conditions decrease cultured keratinocyte mobility: implications for impaired wound healing in patients with diabetes. *Br J Dermatol* 2008;**159**(5):1103-15 doi: 10.1111/j.1365-2133.2008.08789.x[published Online First: Epub Date]|.
15. Marston WA, Dermagraft Diabetic Foot Ulcer Study Group. Risk factors associated with healing chronic diabetic foot ulcers: the importance of hyperglycemia. *Ostomy Wound Manag* 2006;**52**(3):26-8, 30, 32 passim
16. Miner A, Kirsner RS. Diabetic control affects healing rates in neuropathic and vasculopathic patients. *J Invest Dermatol* 2011;**131**(10):1962 doi: 10.1038/jid.2011.269[published Online First: Epub Date]|.
17. Rathsmann B, Jensen-Urstad K, Nystrom T. Intensified insulin treatment is associated with improvement in skin microcirculation and ischaemic foot ulcer in patients with type 1 diabetes mellitus: a long-term follow-up study. *Diabetologia* 2014;**57**(8):1703-10 doi: 10.1007/s00125-014-3248-2[published Online First: Epub Date]|.
18. Fernando M, Seneriratne R, Tan Y, et al. Intensive versus conventional glycaemic control for treating diabetic foot ulcers. *Cochrane Database of Systematic Reviews* 2016; 2016(1).

19. Idris I, Game F, Jeffcoate W. Does close glycaemic control promote healing in diabetic foot ulcers? Report of a feasibility study. *Diabet Med* 2005;**22**(8):1060-3 doi: 10.1111/j.1464-5491.2005.01606.x[published Online First: Epub Date]].
20. Brod M, Christensen T, Kongso JH, et al. Examining and interpreting responsiveness of the Diabetes Medication Satisfaction measure. *J Med Econ* 2009;**12**(4):309-16 doi: 10.3111/13696990903337017[published Online First: Epub Date]].
21. Brod M, Skovlund SE, Wittrup-Jensen KU. Measuring the impact of diabetes through patient report of treatment satisfaction, productivity and symptom experience. *Qual Life Res* 2006;**15**(3):481-91 doi: 10.1007/s11136-005-1624-6[published Online First: Epub Date]].
22. Herdman M, Gudex C, Lloyd A, et al. Development and preliminary testing of the new five-level version of EQ-5D (EQ-5D-5L). *Qual Life Res* 2011;**20**(10):1727-36 doi: 10.1007/s11136-011-9903-x[published Online First: Epub Date]].
23. Janssen MF, Pickard AS, Golicki D, et al. Measurement properties of the EQ-5D-5L compared to the EQ-5D-3L across eight patient groups: a multi-country study. *Qual Life Res* 2013;**22**(7):1717-27 doi: 10.1007/s11136-012-0322-4[published Online First: Epub Date]].
24. Bann CM, Fehnel SE, Gagnon DD. Development and validation of the Diabetic Foot Ulcer Scale-short form (DFS-SF). *Pharmacoeconomics* 2003;**21**(17):1277-90
25. International Diabetes Federation. Global guideline for type 2 diabetes. Available from: <http://www.idf.org/guidelines/type-2-diabetes>, 2005.
26. Fielding S, Fayers P, Ramsay C. Analysing randomised controlled trials with missing data: Choice of approach affects conclusions. *Contemp Clin Trials* 2012;**33**:461-69
27. Margolis DJ, Kantor J, Berlin JA. Healing of diabetic neuropathic foot ulcers receiving standard treatment. A meta-analysis. *Diabetes Care* 1999;**22**(5):692-5
28. Vatankhah N, Jahangiri Y, Landry GJ, et al. Effect of systemic insulin treatment on diabetic wound healing. *Wound Repair and Regeneration* 2017;**25**(2):288-91 doi: 10.1111/wrr.12514[published Online First: Epub Date]].
29. Fernando M, Seneriratne R, Tan Y, et al. Intensive versus conventional glycaemic control for treating diabetic foot ulcers. *Cochrane Database of Systematic Reviews* 2016; (1).
30. Al-Aujan S, Al-Aqeel S, Al-Harbi A, et al. Patients' satisfaction with diabetes medications in one hospital, Saudi Arabia. *Patient Prefer Adherence* 2012;**6**:735-40 doi: 10.2147/PPA.S32859[published Online First: Epub Date]].

## Figure legends

Figure 1 – Point estimate and confidence interval of probability of each criterion being met by recruitment period. Period A was 0-5 weeks and Period B was 6-35 weeks. FC, full criteria; EC, exclusion criterion; IC, inclusion criterion.

Figure 2 – Histograms of participant scores on the three subscales of the Diabetes Medication Satisfaction questionnaire: (a) Burden, (b) Symptoms and (c) Efficacy subscales. Subscales are scored from 0-100, higher scores indicating greater satisfaction.

## Tables

Table 1 Entry criteria assessed in Substudy 1

| Criteria  | Notation | Description                                                                                                                                                   |
|-----------|----------|---------------------------------------------------------------------------------------------------------------------------------------------------------------|
| Inclusion | IC1      | Male or female aged $\geq 18$ years                                                                                                                           |
|           | IC2      | Type 1 or Type 2 diabetes mellitus for more than one year with an HbA1c $\geq 60$ mmol/mol                                                                    |
|           | IC3      | Incident foot ulcer(s) located below the level of the malleoli                                                                                                |
|           | IC4      | Able and willing to undertake home blood glucose monitoring and administer insulin up to 4 times daily under the supervision of the diabetes nurse specialist |
|           | IC5      | Able and willing to provide informed consent to participate in the study                                                                                      |
| Exclusion | EC1      | Ulcers with radiological features of osteomyelitis                                                                                                            |
|           | EC2      | Significant peripheral vascular disease under consideration for re-vascularisation                                                                            |
|           | EC3      | Significant bone deformity as determined by the investigator which may delay wound healing                                                                    |
|           | EC4      | Non-adherence to standard care                                                                                                                                |
|           | EC5      | Any other disease or condition in the opinion of the investigator could make them unsuitable for entry                                                        |
| Full      | FC       | All inclusion criterion satisfied (5-Yes) and all exclusion criterion satisfied (5-No)                                                                        |

EC, exclusion criteria; HbA1c, glycosylated haemoglobin; IC, inclusion criteria.



Table 2 Characteristics of participants included in both substudies

|                                           | Substudy 1<br>Participants (n=78) | Substudy 2<br>Participants (n=15) |
|-------------------------------------------|-----------------------------------|-----------------------------------|
| Median age (IQR), years                   | 58.5 (18.2)                       | 51 (16.5)                         |
| Women, <i>n</i> (%)                       | 30 (38.5)                         | 6 (40)                            |
| Median baseline HbA1c (IQR), mmol/mol     | Not collected                     | 94 (44.8)                         |
| Median baseline FCBS (IQR), mmol/L        | Not collected                     | 9 (9.75)                          |
| Ethnicity, <i>n</i> (%)                   |                                   |                                   |
| Asian                                     | 5 (6.4)                           | 1 (6.7)                           |
| European                                  | 27 (34.6)                         | 4 (26.7)                          |
| Māori                                     | 13 (16.7)                         | 2 (13.3)                          |
| Pacific                                   | 33 (42.3)                         | 7 (46.7)                          |
| Type 1 diabetes mellitus, <i>n</i> (%)    | 12 (15.4)                         | 3 (20.0)                          |
| Type 2 diabetes mellitus, <i>n</i> (%)    | 66 (84.6)                         | 12 (80.0)                         |
| Duration of diabetes, <i>n</i> (%)        |                                   |                                   |
| 0-10 years                                | 15 (19.2)                         | 3 (20.0)                          |
| 10-20 years                               | 31 (39.7)                         | 6 (40.0)                          |
| 20-30 years                               | 22 (28.2)                         | 4 (26.7)                          |
| 30-40 years                               | 7 (9.0)                           | 2 (13.3)                          |
| 40-50 years                               | 3 (3.9)                           | 0 (0.0)                           |
| Peripheral neuropathy, <i>n</i> (%)       | Not collected                     | 15 (100.0)                        |
| Peripheral vascular disease, <i>n</i> (%) | Not collected                     | 1 (6.7)                           |

IQR, interquartile range; HbA1c: glycosylated haemoglobin; FCBS: fasting capillary blood sugar

**Table 3 Unadjusted and adjusted regression results for five ulcer-healing endpoints against fasting capillary blood sugar**

| Ulcer outcome                                     | Adjustment status | Change in outcome per 1 mmol/L increase in FCBS |                 | Equivalent effect size | P      |    |
|---------------------------------------------------|-------------------|-------------------------------------------------|-----------------|------------------------|--------|----|
|                                                   |                   | Estimate                                        | 95% CI          |                        |        |    |
| Ulcer area (cm <sup>2</sup> ) †                   | Unadjusted        | 0.010                                           | [-0.041,0.062]  | 0.004                  | 0.69   |    |
|                                                   | Adjusted§         | 0.004                                           | [-0.024,0.032]  | 0.001                  | 0.77   |    |
| Log(ulcer area+0.01) †                            | Unadjusted        | 0.134                                           | [0.049,0.214]   | 0.10                   | 0.002  | ** |
|                                                   | Adjusted§         | 0.114                                           | [0.020,0.194]   | 0.08                   | 0.0145 | *  |
| Rate of absolute change (cm <sup>2</sup> /week) † | Unadjusted        | 0.011                                           | [-0.018, 0.041] | 0.01                   | 0.45   |    |
|                                                   | Adjusted¶         | 0.011                                           | [-0.019,0.041]  | 0.01                   | 0.69   |    |
| Rate of relative change (%/week <sup>-1</sup> ) † | Unadjusted        | 5.7                                             | [1.1, 10.3]     | 0.06                   | 0.015  | *  |
|                                                   | Adjusted¶         | 5.7                                             | [1.1,10.3]      | 0.06                   | 0.015  | *  |
| Hazard ratio‡                                     | Unadjusted        | 0.90                                            | [0.74,1.10]     | N/A                    | 0.31   |    |
|                                                   | Adjusted † †      | 0.88                                            | [0.71,1.08]     | N/A                    | 0.21   |    |

† Mixed linear regression, additive change reported ‡ Cox regression, multiplicative change reported

§ Adjusted for baseline value and time since Visit 1. ¶ Adjusted for time since Visit 1 only.

† † Adjusted for baseline ulcer area

FCBS: fasting capillary blood sugar; CI: confidence interval

Table 4 Estimated Pearson correlation coefficients between Diabetic Foot Ulcer Scale-Short Form subscale scores and both log(ulcer area+0.01) and EuroQol 5 Dimension 5 Level

| Correlates<br>DFS-SF subscale | log(ulcer area+0.01)† |                |             | EQ-5D-5L VAS |              |             |
|-------------------------------|-----------------------|----------------|-------------|--------------|--------------|-------------|
|                               | Est.                  | 95% CI         | P           | Est.         | 95% CI       | P           |
| Leisure                       | -0.48                 | [-0.66, -0.25] | <0.0001 *** | 0.50         | [0.23, 0.77] | 0.0002 ***  |
| Physical health               | -0.48                 | [-0.66, -0.26] | <0.0001 *** | 0.64         | [0.44, 0.84] | <0.0001 *** |
| Dependence                    | -0.54                 | [-0.71, -0.33] | <0.0001 *** | 0.58         | [0.36, 0.81] | <0.0001 *** |
| Negative emotion              | -0.64                 | [-0.80, -0.42] | <0.0001 *** | 0.38         | [0.04, 0.72] | 0.03 *      |
| Worried about ulcers          | -0.54                 | [-0.71, -0.32] | <0.0001 *** | 0.62         | [0.38, 0.86] | <0.0001 *** |
| Bothered by ulcer care        | -0.46                 | [-0.63, -0.24] | 0.0001 ***  | 0.36         | [0.04, 0.69] | 0.03 *      |

† Area in cm<sup>2</sup>.

CI, confidence interval; DFS-SF: Diabetic Foot Ulcer Scale-Short Form; EQ-5D-5L: EuroQol 5 Dimension 5 Level; VAS: visual analogue scale.

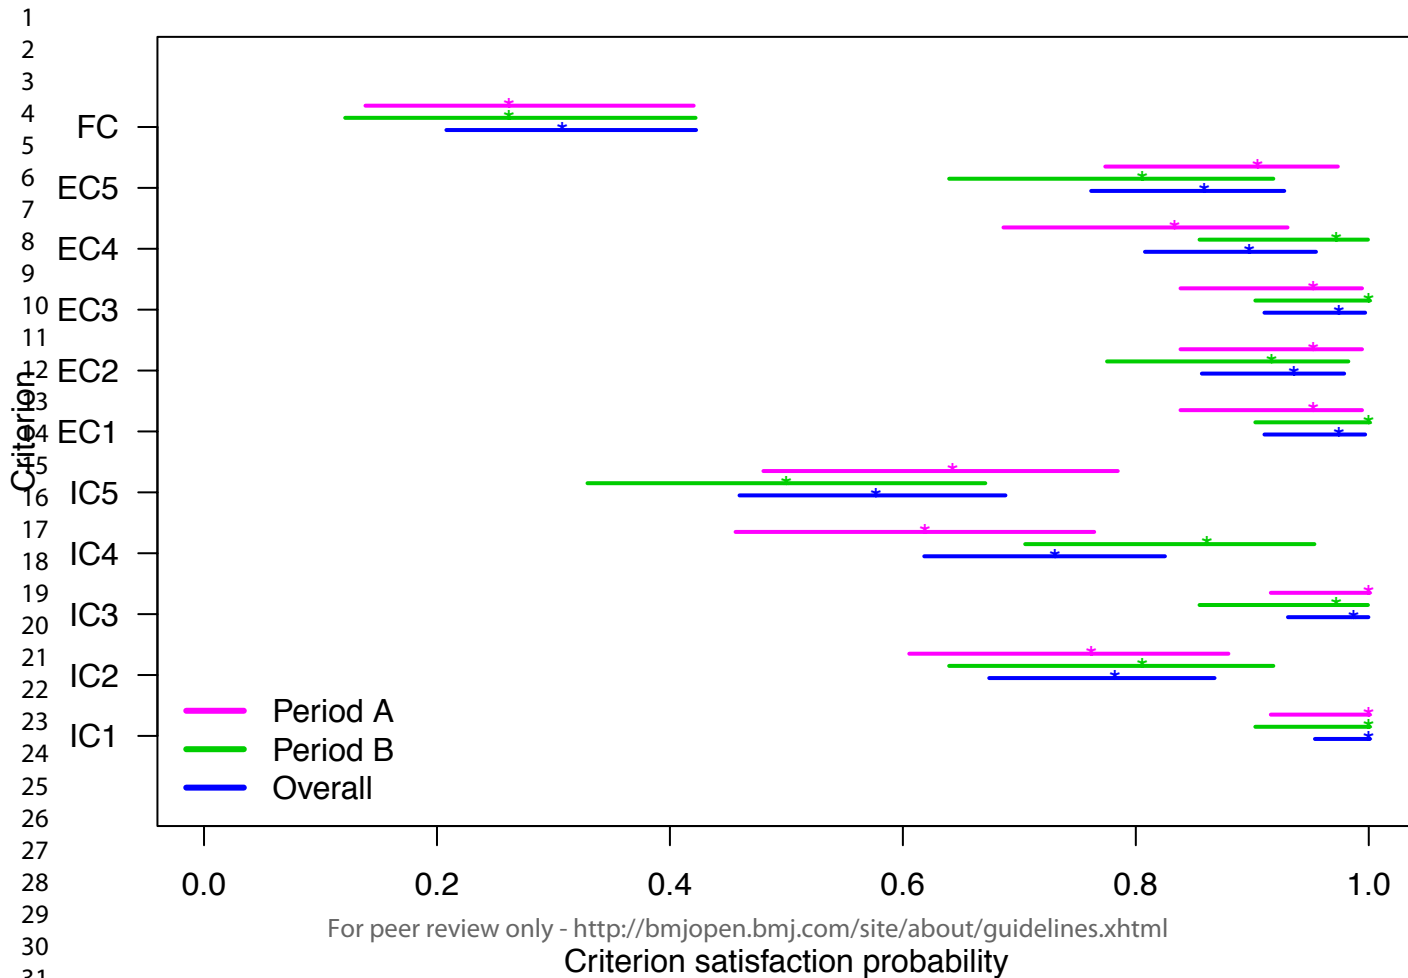

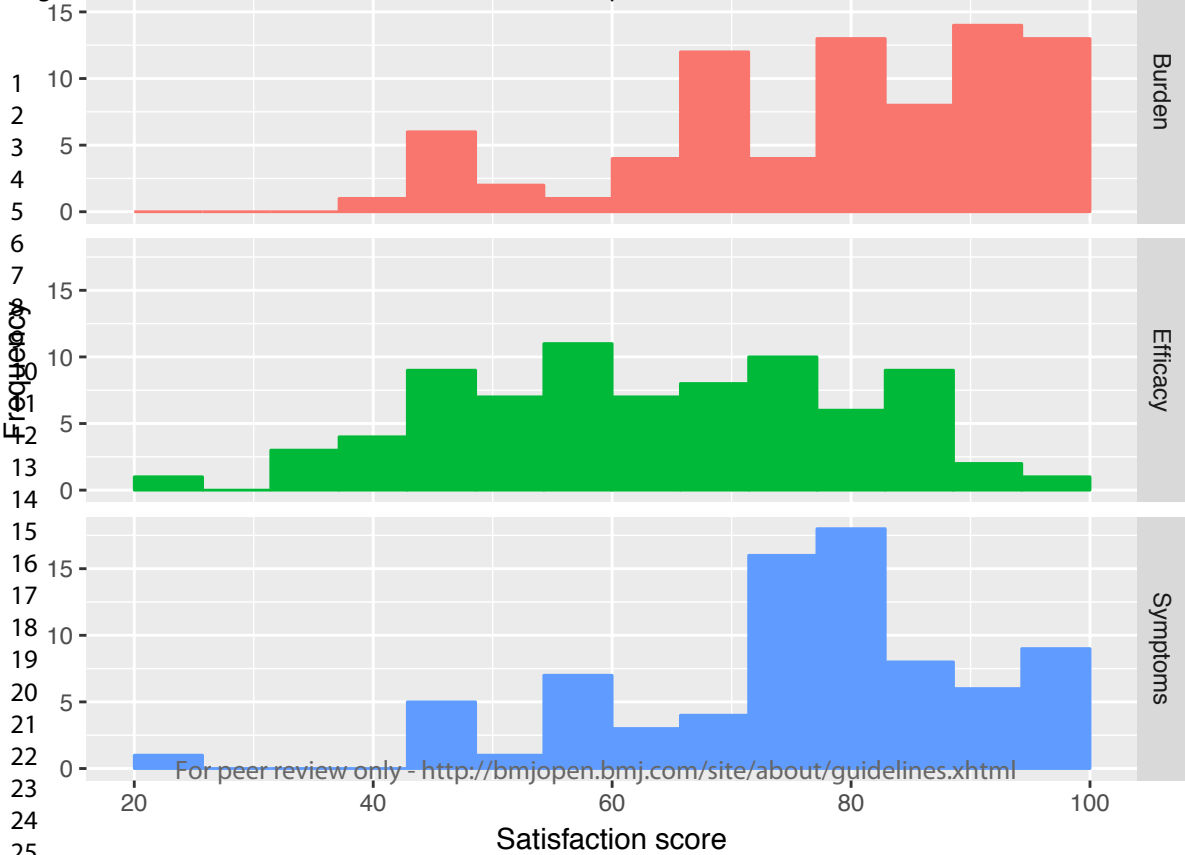

For peer review only - <http://bmjopen.bmj.com/site/about/guidelines.xhtml>

## STROBE Statement—checklist of items that should be included in reports of observational studies

|                    | Item No. | Recommendation                                                                                      | Page No. | Relevant text from manuscript                                                                                                                                                                                                                                                                                                                                                                                                                                                                                                                                                                                                                                                                                                                                                                                                                                                                                                                                                                                                                                                                                                                                                                                                                                                                                                                                                                                                                                                                                                                                                                                                                                                                                  |
|--------------------|----------|-----------------------------------------------------------------------------------------------------|----------|----------------------------------------------------------------------------------------------------------------------------------------------------------------------------------------------------------------------------------------------------------------------------------------------------------------------------------------------------------------------------------------------------------------------------------------------------------------------------------------------------------------------------------------------------------------------------------------------------------------------------------------------------------------------------------------------------------------------------------------------------------------------------------------------------------------------------------------------------------------------------------------------------------------------------------------------------------------------------------------------------------------------------------------------------------------------------------------------------------------------------------------------------------------------------------------------------------------------------------------------------------------------------------------------------------------------------------------------------------------------------------------------------------------------------------------------------------------------------------------------------------------------------------------------------------------------------------------------------------------------------------------------------------------------------------------------------------------|
| Title and abstract | 1        | (a) Indicate the study's design with a commonly used term in the title or the abstract              | Abstract | Two substudies: one cross-sectional, one single-arm prospective                                                                                                                                                                                                                                                                                                                                                                                                                                                                                                                                                                                                                                                                                                                                                                                                                                                                                                                                                                                                                                                                                                                                                                                                                                                                                                                                                                                                                                                                                                                                                                                                                                                |
|                    |          | (b) Provide in the abstract an informative and balanced summary of what was done and what was found | Abstract | <p><i>What was done:</i></p> <p><b>Setting</b> Single-centre secondary care diabetic foot clinic located in New Zealand.</p> <p>Participants Substudy 1: 78 participants consisting of all people <math>\geq 18</math> years with a diabetic foot ulcer presenting to the clinic over 35 weeks in 2015. Substudy 2: 15 participants from Substudy 1 consenting to intensive insulin therapy.</p> <p><b>Intervention</b> None in Substudy 1. Intensive insulin therapy combined with standard podiatry care over 24 weeks.</p> <p><b>Outcome measures</b> Substudy 1: Proportion of participants satisfying potential entry criteria to the RCT. Substudy 2: Glycaemic control (fasting capillary blood sugar; FCBS); time to index ulcer healing; index ulcer size; medication satisfaction (DiabMedSat scores); and health-related quality of life (HrQOL; EQ-5D-5L and DFS-SF scores)..</p> <p><i>What was found:</i></p> <p><b>Results</b> Proportion in Substudy 1 fulfilling all entry criteria was 31% (95% CI 21 to 42). FCBS values declined between baseline and study end (difference -3.7 mmol/L, 95% CI -6.5 to -0.8), suggesting adherence to therapeutic regimen; 83% (95% CI 44 to 95) of ulcers healed by 24 weeks. FCBS correlated negatively, and weakly-to-moderately, with medication satisfaction. Log(ulcer area in <math>\text{cm}^2 + 0.01</math>) was most sensitive to FCBS changes, correlating negatively, and moderately-to-strongly with QOL measures. Detecting a 30% between-group difference in the ulcer area logarithm (80% power, <math>\alpha = 5\%</math>) requires 220 participants per arm, achievable within 1 year with 15 centres similar to the study setting.</p> |

| <b>Introduction</b>  |   |                                                                                      |     |                                                                                                                                                                                                                                                                                                                                                                                                                                                                                                                                                                                                                                                                                                                                                                                                                                                                                                                                                                                                                                                                                                                                   |
|----------------------|---|--------------------------------------------------------------------------------------|-----|-----------------------------------------------------------------------------------------------------------------------------------------------------------------------------------------------------------------------------------------------------------------------------------------------------------------------------------------------------------------------------------------------------------------------------------------------------------------------------------------------------------------------------------------------------------------------------------------------------------------------------------------------------------------------------------------------------------------------------------------------------------------------------------------------------------------------------------------------------------------------------------------------------------------------------------------------------------------------------------------------------------------------------------------------------------------------------------------------------------------------------------|
| Background/rationale | 2 | Explain the scientific background and rationale for the investigation being reported | 5   | [...]clinical practice guidelines from the Society for Vascular Surgery, American Podiatric Medical Association, and Society for Vascular Medicine now recommend adequate glycaemic control (glycosylated haemoglobin [HbA1c] <53 mmol/mol) to reduce the incidence of diabetic foot ulcers 1. The evidence that improved glycaemic control can accelerate the healing of foot ulcers and reduce the incidence of ulceration and amputation remains observational 11-17. There is no randomised trial evidence that tight glycaemic control improves ulcer wound healing 18. A previous feasibility study in this area 19 concluded 15 years ago that a definitive randomised trial in this area was not feasible, possibly due to exacting entry criteria. To investigate further whether a randomised controlled trial (RCT) evaluating the efficacy of intensive insulin therapy on diabetic foot ulcer healing is possible, this two-part feasibility study sought appropriate but less stringent trial entry criteria to improve accrual rates (Substudy 1) and sought appropriate endpoints for such a trial (Substudy 2).. |
| Objectives           | 3 | State specific objectives, including any prespecified hypotheses                     | 6   | The primary objective of Substudy 1 was to estimate the proportion of participants satisfying the entry criteria for the planned RCT.. [...]Secondary objectives were to estimate the length of the recruitment period for the intended RCT, and determine participant satisfaction with their diabetes medication.<br><br>In Substudy 2, the main objective was to determine a primary endpoint for the RCT by analysing sensitivity of ulcer healing-related outcomes [...]to glycaemic control accounting for standard podiatry care. The ulcer healing outcome measure with the best association with glycaemic control was to be assessed for convergent validity with an established foot ulcer scale. Secondary objectives included examining the relationship between adherence (using glycaemic control as proxy), as well as attendance, and satisfaction with diabetes medication, and evaluating health-related quality of life (HrQOL) measures in this population.                                                                                                                                                  |
| <b>Methods</b>       |   |                                                                                      |     |                                                                                                                                                                                                                                                                                                                                                                                                                                                                                                                                                                                                                                                                                                                                                                                                                                                                                                                                                                                                                                                                                                                                   |
| Study design         | 4 | Present key elements of study design early in the paper                              | 7   | <i>First paragraph of Setting and Study Design section:</i><br>Substudy 1 was a cross-sectional study enrolling all people aged $\geq 18$ years with diabetes and a current foot ulcer presenting at the CMH Diabetes Foot Clinic over a period of 24 weeks. Substudy 2 was a single-arm interventional study enrolling Substudy 1 participants meeting all entry criteria (below) and treating them with intensive insulin therapy for 24 weeks.                                                                                                                                                                                                                                                                                                                                                                                                                                                                                                                                                                                                                                                                                 |
| Setting              | 5 | Describe the setting, locations, and relevant                                        | 7-8 | <i>Setting, location and relevant dates, including periods of recruitment, follow-up:</i>                                                                                                                                                                                                                                                                                                                                                                                                                                                                                                                                                                                                                                                                                                                                                                                                                                                                                                                                                                                                                                         |

1  
2  
3  
4  
5  
6  
7  
8  
9  
10  
11  
12

dates, including periods of recruitment, exposure, follow-up, and data collection

The study was conducted at the Counties Manukau Health (CMH) Diabetes Foot Clinic in Auckland, New Zealand between February and October 2015, with Substudy 2 follow-up to February 2016. [...]Substudy 2 was a single-arm interventional study enrolling Substudy 1 participants meeting all entry criteria (below) and treating them with intensive insulin therapy for 24 weeks.

*Data collection:*  
Their foot wound(s) (index ulcers) were inspected, and entry criteria status (Table 1) and demographic data recorded. In Substudy 2, visits occurred weekly between weeks 1 (baseline) and 4, then at 6, 8, 12, 16, 20 and 24 weeks, or until the index ulcers healed.

13  
14  
15  
16  
17  
18  
19  
20  
21  
22  
23  
24  
25  
26  
27  
28  
29  
30  
31  
32  
33  
34  
35  
36  
37  
38  
39  
40  
41  
42

Participants 6 (a) Cohort study—Give the eligibility criteria, and the sources and methods of selection of participants. Describe methods of follow-up  
*Cross-sectional study*—Give the eligibility criteria, and the sources and methods of selection of participants

7 + Table 1 *Cross-sectional:*

Substudy 1 was a cross-sectional study that enrolled all people aged  $\geq 18$  years with diabetes and a current foot ulcer presenting at the CMH Diabetes Foot Clinic over a period of 24 weeks.

*Longitudinal:*

Substudy 2 was a single-arm interventional study that enrolled Substudy 1 participants meeting all entry criteria (Table 1)

**Table 1** Entry criteria assessed in Substudy 1 (primary objective)

| Criteria      | Notation | Description                                                                                                                                                   |
|---------------|----------|---------------------------------------------------------------------------------------------------------------------------------------------------------------|
| Inclusion     | IC1      | Male or female aged $\geq 18$ years                                                                                                                           |
|               | IC2      | Type 1 or Type 2 diabetes mellitus for more than one year with an HbA <sub>1c</sub> $\geq 60$ mmol/mol ( $\geq 7.6\%$ )                                       |
|               | IC3      | Incident foot ulcer(s) located below the level of the malleoli                                                                                                |
|               | IC4      | Able and willing to undertake home blood glucose monitoring and administer insulin up to 4 times daily under the supervision of the diabetes nurse specialist |
|               | IC5      | Able and willing to provide informed consent to participate in the study                                                                                      |
| Exclusion     | EC1      | Ulcers with radiological features of osteomyelitis                                                                                                            |
|               | EC2      | Significant peripheral vascular disease under consideration for re-vascularisation                                                                            |
|               | EC3      | Significant bone deformity as determined by the investigator which may delay wound healing                                                                    |
|               | EC4      | Non-adherence to standard care                                                                                                                                |
|               | EC5      | Any other disease or condition in the opinion of the investigator could make them unsuitable for entry                                                        |
| Full Criteria | FC       | All inclusion criterion satisfied (5-Yes) and all exclusion criterion satisfied (5-No)                                                                        |



---

EC, exclusion criteria; HbA<sub>1c</sub>, glycosylated haemoglobin; IC, inclusion criteria.

---

(b) *Cohort study*—For matched studies, give matching criteria and number of exposed and unexposed  
*Case-control study*—For matched studies, give matching criteria and the number of controls per case

---

|                              |    |                                                                                                                                                                                      |    |                                                                                                                                                                                                                                                                                                                                                                                                                                                                                                                                                                                                                                                                                                                                                                                                                                                                                                                                                               |
|------------------------------|----|--------------------------------------------------------------------------------------------------------------------------------------------------------------------------------------|----|---------------------------------------------------------------------------------------------------------------------------------------------------------------------------------------------------------------------------------------------------------------------------------------------------------------------------------------------------------------------------------------------------------------------------------------------------------------------------------------------------------------------------------------------------------------------------------------------------------------------------------------------------------------------------------------------------------------------------------------------------------------------------------------------------------------------------------------------------------------------------------------------------------------------------------------------------------------|
| Variables                    | 7  | Clearly define all outcomes, exposures, predictors, potential confounders, and effect modifiers. Give diagnostic criteria, if applicable                                             | 8  | <p><b>Study procedures and outcomes</b></p> <p>Substudy 1 participants completed a Diabetes Medication Satisfaction (DiabMedSat) questionnaire. Their foot wound(s) (index ulcers) were inspected, and entry criteria status (Table 1) and demographic data recorded. In Substudy 2, [...] [t]he following were undertaken at each visit: ulcer examination: digital photographic planimetry of ulcer area (using the SilhouetteStar camera, ARANZ Medical, New Zealand); FCBS measurement (in mmol/L); medication review; and adverse events assessment. FCBS was used in the analyses as a measure of glycaemic control and as a proxy for adherence. HbA1c was assessed at baseline and at the end of trial, providing an assessment of chronic hyperglycaemia. [...]. In addition, participants completed three questionnaires at each visit: DiabMedSat, EuroQol 5 Dimensions 5 Levels (EQ-5D-5L) and Diabetic Foot Ulcer Scale-Short Form (DFS-SF).</p> |
| Data sources/<br>measurement | 8* | For each variable of interest, give sources of data and details of methods of assessment (measurement). Describe comparability of assessment methods if there is more than one group |    | <p><i>See 7 above. No comparator group is used in this feasibility study.</i></p>                                                                                                                                                                                                                                                                                                                                                                                                                                                                                                                                                                                                                                                                                                                                                                                                                                                                             |
| Bias                         | 9  | Describe any efforts to address potential sources of bias                                                                                                                            | 9  | <p><i>Substudy 1 – bias due to differential initial and later recruitment:</i></p> <p>A Poisson exact test was used to compare recruitment rates over two recruitment periods and mixed logistic regression used to compare differences in entry criteria fulfilment between the periods.</p> <p><i>Substudy 2 – bias due to confounding by time::</i></p> <p>Linear mixed models were used to determine the relationship between four different ulcer area-related outcomes at each visit [...] and glycaemic control. (The value of 0.01 in the logarithmic endpoint was chosen on the basis of the data to improve the normality of the outcome.) [...]. Time- and/or baseline ulcer area-adjusted estimates, as well as unadjusted estimates, were produced to assess potential confounding, as tight management in a foot clinic may promote ulcer healing in several ways.</p>                                                                          |
|                              |    |                                                                                                                                                                                      | 10 | <p><i>Substudy 2 – bias due to missingness:</i></p>                                                                                                                                                                                                                                                                                                                                                                                                                                                                                                                                                                                                                                                                                                                                                                                                                                                                                                           |

[The non-survival] analyses all involved mixed models on longitudinal data, known to alleviate selection bias due to missingness.

*The relevant sources of bias for the main study (for which this is a feasibility study) is bias due to loss to follow-up or missingness. Accordingly, we have attempted to briefly characterise participant attendance:*

Descriptive statistics were produced on completed follow-ups (defined as healing before 24 weeks or attending the 24-week visit) and attended visits. Attendance probability was regressed on the most recently available FCBS, measure of ulcer area and DiabMedSat subscores using mixed logistic regression.

---

|            |    |                                           |   |                                                                                                                                                                                                                                                                                                                                                                                                                                                                                                                                                                 |
|------------|----|-------------------------------------------|---|-----------------------------------------------------------------------------------------------------------------------------------------------------------------------------------------------------------------------------------------------------------------------------------------------------------------------------------------------------------------------------------------------------------------------------------------------------------------------------------------------------------------------------------------------------------------|
| Study size | 10 | Explain how the study size was arrived at | 7 | <p><b>Accrual period and sample size</b></p> <p>The accrual period for Substudy 1 (35 weeks) was selected as long as possible while respecting contractual obligations with the study funder.[...]</p> <p>Substudy 2 aimed to recruit 20 participants. Assuming 10% attrition, this number is sufficient to estimate the standard deviation of a continuous variable (e.g. ulcer area) with a coefficient of variation inferior to 0.2. This criterion is consistent with the goal of identifying a sensitive primary endpoint endowed with good precision.</p> |
|------------|----|-------------------------------------------|---|-----------------------------------------------------------------------------------------------------------------------------------------------------------------------------------------------------------------------------------------------------------------------------------------------------------------------------------------------------------------------------------------------------------------------------------------------------------------------------------------------------------------------------------------------------------------|

---

|                        |    |                                                                                                                              |      |                                                                                                                                                                                                                                                                                                                                                                                                                                                                                                                                                                                                                                                                                                                                                                                                                                                                                                                                                                                                                                                       |
|------------------------|----|------------------------------------------------------------------------------------------------------------------------------|------|-------------------------------------------------------------------------------------------------------------------------------------------------------------------------------------------------------------------------------------------------------------------------------------------------------------------------------------------------------------------------------------------------------------------------------------------------------------------------------------------------------------------------------------------------------------------------------------------------------------------------------------------------------------------------------------------------------------------------------------------------------------------------------------------------------------------------------------------------------------------------------------------------------------------------------------------------------------------------------------------------------------------------------------------------------|
| Quantitative variables | 11 | Explain how quantitative variables were handled in the analyses. If applicable, describe which groupings were chosen and why | 9-10 | <p><i>Substudy 1:</i></p> <p>Descriptive statistics were produced for [...] DiabMedSat subscores. Multivariate analysis of variance (MANOVA) was used to detect differences in subscores based on demographic or participant characteristics. [...] [M]ixed logistic regression [was] used to compare differences in entry criteria fulfilment between the periods. Indicators of criterion satisfaction were fitted jointly by themselves in a first model, and interacting with period in a second model.</p> <p><i>Substudy 2:</i></p> <p>[...]</p> <p>Linear mixed models were used to determine the relationship between four different ulcer area-related outcomes at each visit (ulcer area in cm<sup>2</sup>, log[ulcer area+0.01], absolute and relative rates of change in ulcer area, where “log” is the natural logarithm function) and glycaemic control. (The value of 0.01 in the logarithmic endpoint was chosen based on the data to improve the normality of the outcome.) FCBS was the fixed effect and participant the random</p> |
|------------------------|----|------------------------------------------------------------------------------------------------------------------------------|------|-------------------------------------------------------------------------------------------------------------------------------------------------------------------------------------------------------------------------------------------------------------------------------------------------------------------------------------------------------------------------------------------------------------------------------------------------------------------------------------------------------------------------------------------------------------------------------------------------------------------------------------------------------------------------------------------------------------------------------------------------------------------------------------------------------------------------------------------------------------------------------------------------------------------------------------------------------------------------------------------------------------------------------------------------------|

---

effect. [...]The most sensitive outcome was selected by consideration of its time-adjusted observed significance level and its equivalent Cohen's effect size where appropriate. To estimate correlations and their 95% confidence intervals (CI) using longitudinal data, we fitted outcomes jointly using a heterogeneous compound symmetry covariance model, and using only intercepts as fixed effects. We thus obtained correlations between DFS-SF subscores and selected ulcer healing outcome; between DiabMedSat subscores and FCBS; and between DFS-SF subscores and EQ-5D-5L. (*And before any non-statistical reviewer vociferates that this makes no sense, they should talk to a statistician.*)

Descriptive statistics were produced on completed follow-ups (defined as healing before 24 weeks or attending the 24-week visit) and attended visits. Attendance probability was regressed on the most recently available FCBS, measure of ulcer area and DiabMedSat subscores using mixed logistic regression. The final attendance model was selected using AIC.

|                     |    |                                                                                       |   |                                                                                                                                                                                                                                                                                                                                                                                                                                                                                                                                                                                                                                                                                                                                                                                                                                          |
|---------------------|----|---------------------------------------------------------------------------------------|---|------------------------------------------------------------------------------------------------------------------------------------------------------------------------------------------------------------------------------------------------------------------------------------------------------------------------------------------------------------------------------------------------------------------------------------------------------------------------------------------------------------------------------------------------------------------------------------------------------------------------------------------------------------------------------------------------------------------------------------------------------------------------------------------------------------------------------------------|
| Statistical methods | 12 | (a) Describe all statistical methods, including those used to control for confounding | 9 | <p><i>See 11 above, to which we add:</i></p> <p><i>Substudy 1:</i></p> <p>Descriptive statistics were produced for participant demographic characteristics, recruitment rate, entry criteria fulfilment [...].</p> <p>A Poisson exact test was used to compare recruitment rates over two recruitment periods [...].</p> <p><i>Substudy 2:</i></p> <p>Time-to-healing was considered as a fifth possible outcome, and Cox regression used to estimate the hazard ratio of ulcer healing under changes in FCBS, taken as a time-dependent covariate.</p> <p><i>Substudy 2 – in regard to confounding:</i></p> <p>Time- and/or baseline ulcer area-adjusted estimates, as well as unadjusted estimates, were produced to assess potential confounding, as tight management in a foot clinic may promote ulcer healing in several ways.</p> |
|                     |    | (b) Describe any methods used to examine subgroups and interactions                   | 9 | <p><i>Applies to Substudy 1 only:</i></p> <p>[...] [M]ixed logistic regression [was] used to compare differences in entry criteria fulfilment between the periods. Indicators of criterion satisfaction were fitted jointly by themselves in a first model, and interacting with period in a second model. Models were compared using a deviance test.</p>                                                                                                                                                                                                                                                                                                                                                                                                                                                                               |

|    |              |                     |            |                                                                                                                                                                        |
|----|--------------|---------------------|------------|------------------------------------------------------------------------------------------------------------------------------------------------------------------------|
| 1  |              |                     |            |                                                                                                                                                                        |
| 2  |              | (c) Explain how     | 10         | (Note: No missing data in Substudy 1).                                                                                                                                 |
| 3  |              | missing data were   |            |                                                                                                                                                                        |
| 4  |              | addressed           |            | No data were missing for time-to-healing analyses. Other analyses all involved mixed models on longitudinal data, known to alleviate selection bias due to missingness |
| 5  |              |                     |            |                                                                                                                                                                        |
| 6  |              |                     |            |                                                                                                                                                                        |
| 7  |              | (d) Cohort          | 10         | Cross-sectional Substudy 1: not applicable                                                                                                                             |
| 8  |              | study—If            |            |                                                                                                                                                                        |
| 9  |              | applicable,         |            | Longitudinal Substudy 2:                                                                                                                                               |
| 10 |              | explain how loss    |            | Descriptive statistics were produced on completed follow-ups (defined as healing before 24 weeks or attending the                                                      |
| 11 |              | to follow-up was    |            | 24-week visit) and attended visits. Attendance probability was regressed on the most recently available FCBS,                                                          |
| 12 |              | addressed           |            | measure of ulcer area and DiabMedSat subscores using mixed logistic regression. The final attendance model was                                                         |
| 13 |              |                     |            | selected using AIC.                                                                                                                                                    |
| 14 |              | Cross-sectional     |            |                                                                                                                                                                        |
| 15 |              | study—If            |            |                                                                                                                                                                        |
| 16 |              | applicable,         |            | See also 12 (c).                                                                                                                                                       |
| 17 |              | describe analytical |            |                                                                                                                                                                        |
| 18 |              | methods taking      |            |                                                                                                                                                                        |
| 19 |              | account of          |            |                                                                                                                                                                        |
| 20 |              | sampling strategy   |            |                                                                                                                                                                        |
| 21 |              |                     |            |                                                                                                                                                                        |
| 22 |              | (e) Describe any    | 10         | Arguably, our main analysis for Substudy 2 is a sensitivity analysis:                                                                                                  |
| 23 |              | sensitivity         |            | Linear mixed models were used to determine the relationship between four different ulcer area-related outcomes at                                                      |
| 24 |              | analyses            |            | each visit (ulcer area in cm <sup>2</sup> , log[ulcer area+0.01], absolute and relative rates of change in ulcer area) and glycaemic                                   |
| 25 |              |                     |            | control. (The value of 0.01 in the logarithmic endpoint was chosen based on the data to improve the normality of the                                                   |
| 26 |              |                     |            | outcome.) FCBS was the fixed effect and participant the random effect. Time-to-healing was considered as a fifth                                                       |
| 27 |              |                     |            | possible outcome. A Kaplan-Meier estimate of ulcer persistence probability was produced and Cox regression used                                                        |
| 28 |              |                     |            | to estimate the hazard ratio of ulcer healing under changes in FCBS, taken as a time-dependent covariate. Time-                                                        |
| 29 |              |                     |            | and/or baseline ulcer area-adjusted estimates, as well as unadjusted estimates, were produced to assess potential                                                      |
| 30 |              |                     |            | confounding, as tight management in a foot clinic may promote ulcer healing in several ways. The most sensitive                                                        |
| 31 |              |                     |            | outcome was selected by consideration of its adjusted observed significance level and its equivalent Cohen's effect                                                    |
| 32 |              |                     |            | size where appropriate.                                                                                                                                                |
| 33 |              |                     |            |                                                                                                                                                                        |
| 34 |              |                     |            |                                                                                                                                                                        |
| 35 |              |                     |            |                                                                                                                                                                        |
| 36 |              |                     |            |                                                                                                                                                                        |
| 37 |              |                     |            |                                                                                                                                                                        |
| 38 |              | <b>Results</b>      |            |                                                                                                                                                                        |
| 39 | Participants | 13*                 | (a) Report | 10                                                                                                                                                                     |
| 40 |              |                     | numbers of | Seventy-eight participants (all unique clinic visitors during the recruitment period) were enrolled in Substudy 1.                                                     |
| 41 |              |                     |            |                                                                                                                                                                        |
| 42 |              |                     |            |                                                                                                                                                                        |
| 43 |              |                     |            |                                                                                                                                                                        |
| 44 |              |                     |            |                                                                                                                                                                        |
| 45 |              |                     |            |                                                                                                                                                                        |
| 46 |              |                     |            |                                                                                                                                                                        |

|                  |     |                                                                                                                                          |    |                                                                                                                                                                                                                                                                                                                                                                                                                                                                                                                                                                                                                                                                                                                                                                                                                                                                                                                            |
|------------------|-----|------------------------------------------------------------------------------------------------------------------------------------------|----|----------------------------------------------------------------------------------------------------------------------------------------------------------------------------------------------------------------------------------------------------------------------------------------------------------------------------------------------------------------------------------------------------------------------------------------------------------------------------------------------------------------------------------------------------------------------------------------------------------------------------------------------------------------------------------------------------------------------------------------------------------------------------------------------------------------------------------------------------------------------------------------------------------------------------|
|                  |     |                                                                                                                                          |    | <p>individuals at each stage of study—eg numbers potentially eligible, examined for eligibility, confirmed eligible, included in the study, completing follow-up, and analysed</p> <p><i>Substudy 2:</i><br/>(page 8): Substudy 2 was a single-arm interventional study that enrolled Substudy 1 participants meeting all entry criteria [...].<br/>(page 11): Seventy-eight participants (all unique clinic visitors during the recruitment period) were enrolled in Substudy 1 [...].<br/>(page 12 – this is apparently out of order because it is a feasibility result): Twenty-four participants (30.8% [95% CI 20.8, 42.2]) met all criteria.<br/>(page 12): Seventeen participants entered Substudy 2. One withdrew consent after Visit 1 and another was healed on Visit 1, leaving 15 participants in the analysis set.<br/>(page 12): Two participants with unhealed ulcers did not attend the 24-week visit.</p> |
|                  |     | (b) Give reasons for non-participation at each stage                                                                                     | 11 | <p><i>Substudy 2:</i><br/>One withdrew consent after Visit 1 and another was healed on Visit 1, leaving 15 participants in the analysis set.</p>                                                                                                                                                                                                                                                                                                                                                                                                                                                                                                                                                                                                                                                                                                                                                                           |
|                  |     | (c) Consider use of a flow diagram                                                                                                       |    | <i>The flow appears to us to be simple enough not to warrant a diagram.</i>                                                                                                                                                                                                                                                                                                                                                                                                                                                                                                                                                                                                                                                                                                                                                                                                                                                |
| Descriptive data | 14* | (a) Give characteristics of study participants (eg demographic, clinical, social) and information on exposures and potential confounders | 7  | <p><i>Substudy 1 (see also Table 1):</i><br/>Mean age was 57.3 years (SD 14.0). The majority were men and most were of Pacific or European ethnicity. (Table 2).</p> <p><i>Substudy 2 – see Table 2</i></p>                                                                                                                                                                                                                                                                                                                                                                                                                                                                                                                                                                                                                                                                                                                |
|                  |     | (b) Indicate number of participants with missing data for                                                                                | 11 | <p><i>Substudy 2:</i><br/>Clinical constraints or patient choice prevented some measurements from being taken, yielding completeness proportions for specific outcomes between 78% (DMS and FCBS) and 85% (ulcer area).</p>                                                                                                                                                                                                                                                                                                                                                                                                                                                                                                                                                                                                                                                                                                |

|              |                   |                                                                                                      |    |                                                                                                                                                                                                                                                                                                                                                                                                                                                                                                      |
|--------------|-------------------|------------------------------------------------------------------------------------------------------|----|------------------------------------------------------------------------------------------------------------------------------------------------------------------------------------------------------------------------------------------------------------------------------------------------------------------------------------------------------------------------------------------------------------------------------------------------------------------------------------------------------|
|              |                   | each variable of interest                                                                            |    |                                                                                                                                                                                                                                                                                                                                                                                                                                                                                                      |
|              | (c) Cohort study— | Summarise follow-up time (eg, average and total amount)                                              | 11 | <i>Substudy 2:</i><br><b>Completeness</b><br>Of the 102 scheduled visits, 12 were missed [...].The average follow-up time to healing or last visit was 17.6 weeks (SD 7.8).                                                                                                                                                                                                                                                                                                                          |
| Outcome data | 15*               | <i>Cohort study—</i><br>Report numbers of outcome events or summary measures over time               | 12 | <i>Substudy 2:</i><br>Twelve Substudy 2 participants experienced complete healing between weeks 3 and 24; the remaining three had unhealed ulcers at the time of their last visit on or before week 24. Median ulcer healing time was 7 weeks. The Kaplan-Meier estimate of the proportion of ulcers not healing by week 24 was 16.7% (95% CI 5.0–56.1%).<br><i>Table 4 for summary correlations</i>                                                                                                 |
|              |                   | <i>Case-control study—</i> Report numbers in each exposure category, or summary measures of exposure |    |                                                                                                                                                                                                                                                                                                                                                                                                                                                                                                      |
|              |                   | <i>Cross-sectional study—</i> Report numbers of outcome events or summary measures                   | 8  | <i>Substudy 1:</i><br><b>Recruitment rate and entry criteria</b><br>Period A (as defined earlier) finished after 6 weeks, and was the most active with 42 participants recruited compared with 36 participants over the remaining 29 weeks, forming Period B.<br>All participants satisfied criterion IC1, 78.2% met IC2, 98.7% met IC3, 73.1% met IC4 and 57.7% met IC5. Twenty-four participants (30.8% [95% CI 20.8, 42.2]) met all criteria.<br>[...]<br><b>Diabetes Medication Satisfaction</b> |

Higher scores on the DiabMedSat subscales indicate increased satisfaction for all three subscales. The subscale histograms are displayed in Figure 2. Median score for the Efficacy subscale was 63.3 (interquartile range [IQR] 26.7), and was numerically lower than those of the Burden (81.8 [IQR 22.8]) and Symptom subscales (80.0 [IQR 16.0]).

Main results

16

(a) Give unadjusted estimates and, if applicable, confounder-adjusted estimates and their precision (eg, 95% confidence interval). Make clear which confounders were adjusted for and why they were included

Table 3

**Table 1 Unadjusted and adjusted regression results for five ulcer-healing endpoints against fasting capillary blood sugar**

| Ulcer outcome                                     | Adjustment status | Change in outcome per 1 mmol/L increase in FCBS |                 | Equivalent effect size | P      |    |
|---------------------------------------------------|-------------------|-------------------------------------------------|-----------------|------------------------|--------|----|
|                                                   |                   | Estimate                                        | 95% CI          |                        |        |    |
| Ulcer area (cm <sup>2</sup> ) †                   | Unadjusted        | 0.010                                           | [-0.041,0.062]  | 0.004                  | 0.69   |    |
|                                                   | Adjusted§         | 0.004                                           | [-0.024,0.032]  | 0.001                  | 0.77   |    |
| Log(ulcer area+0.01) †                            | Unadjusted        | 0.134                                           | [0.049,0.214]   | 0.10                   | 0.002  | ** |
|                                                   | Adjusted§         | 0.114                                           | [0.020,0.194]   | 0.08                   | 0.0145 | *  |
| Rate of absolute change (cm <sup>2</sup> /week) † | Unadjusted        | 0.011                                           | [-0.018, 0.041] | 0.01                   | 0.45   |    |
|                                                   | Adjusted¶         | 0.011                                           | [-0.019,0.041]  | 0.01                   | 0.69   |    |
| Rate of relative change (%/week <sup>-1</sup> ) † | Unadjusted        | 5.7                                             | [1.1, 10.3]     | 0.06                   | 0.015  | *  |
|                                                   | Adjusted¶         | 5.7                                             | [1.1,10.3]      | 0.06                   | 0.015  | *  |
| Hazard ratio‡                                     | Unadjusted        | 0.90                                            | [0.74,1.10]     | N/A                    | 0.31   |    |
|                                                   | Adjusted † †      | 0.88                                            | [0.71,1.08]     | N/A                    | 0.21   |    |

† Mixed linear regression, additive change reported ‡ Cox regression, multiplicative change reported

§ Adjusted for baseline value and time since Visit 1. ¶ Adjusted for time since Visit 1 only.

† † Adjusted for baseline ulcer area

FCBS: fasting capillary blood sugar; CI: confidence interval

(b) Report category boundaries when continuous variables were categorized

*Not applicable.*



1  
2  
3  
4  
5  
6  
7  
8  
9  
10  
11  
12  
13  
14  
15  
16  
17  
18  
19  
20  
21  
22  
23  
24  
25  
26  
27  
28  
29  
30  
31  
32  
33  
34  
35  
36  
37  
38  
39  
40  
41  
42  
43  
44  
45  
46

---

|  |  |                                                                                                                  |    |                                                                                                                                                                                                   |
|--|--|------------------------------------------------------------------------------------------------------------------|----|---------------------------------------------------------------------------------------------------------------------------------------------------------------------------------------------------|
|  |  | (c) If relevant, consider translating estimates of relative risk into absolute risk for a meaningful time period | 11 | <i>Substudy 1:</i><br>The A-to-B rate ratio of eligibility to a full study, however, was 4.1 (95% CI 1.8-9.2). The eligibility rate in period B was 0.45 participant per week (95% CI 0.24-0.77). |
|--|--|------------------------------------------------------------------------------------------------------------------|----|---------------------------------------------------------------------------------------------------------------------------------------------------------------------------------------------------|

---

|                |    |                                                                                                |  |                        |
|----------------|----|------------------------------------------------------------------------------------------------|--|------------------------|
| Other analyses | 17 | Report other analyses done—eg analyses of subgroups and interactions, and sensitivity analyses |  | <i>Not applicable.</i> |
|----------------|----|------------------------------------------------------------------------------------------------|--|------------------------|

---

**Discussion**

|             |    |                                                          |    |                                                                                                                                                                                                                                                                                                                                                                                                                                                                                                                                                                            |
|-------------|----|----------------------------------------------------------|----|----------------------------------------------------------------------------------------------------------------------------------------------------------------------------------------------------------------------------------------------------------------------------------------------------------------------------------------------------------------------------------------------------------------------------------------------------------------------------------------------------------------------------------------------------------------------------|
| Key results | 18 | Summarise key results with reference to study objectives | 10 | This feasibility study showed that by using less stringent entry criteria, more people with diabetic foot ulcers attending our foot clinic (30%) may be eligible for a proposed RCT investigating the efficacy of an intensive insulin regimen on diabetic foot ulcer healing than reported in a previous feasibility study (0.5% [1/200]) 19. The study also showed that the primary endpoint of log(ulcer area+0.01), with ulcer area measured using digital photographic planimetry, may be sensitive enough to glycaemic control to base an RCT on in this population. |
|-------------|----|----------------------------------------------------------|----|----------------------------------------------------------------------------------------------------------------------------------------------------------------------------------------------------------------------------------------------------------------------------------------------------------------------------------------------------------------------------------------------------------------------------------------------------------------------------------------------------------------------------------------------------------------------------|

---

|             |    |                                                                                                 |    |                                                                                                                                                                                                                                                                                                                                                                                                                                                                                                                                                                       |
|-------------|----|-------------------------------------------------------------------------------------------------|----|-----------------------------------------------------------------------------------------------------------------------------------------------------------------------------------------------------------------------------------------------------------------------------------------------------------------------------------------------------------------------------------------------------------------------------------------------------------------------------------------------------------------------------------------------------------------------|
| Limitations | 19 | Discuss limitations of the study, taking into account sources of potential bias or imprecision. | 11 | <i>(No biasing issue was identified, but see 21.)</i><br>Some limitations temper the interpretation of our results. Firstly, Substudy 2 did not reach the target sample size of 20. This shortfall was largely due to availability of personnel and funder timelines. These issues, particularly around staffing, have the potential to affect any future RCT. Moreover, the study was conducted at a single centre in New Zealand, limiting generalisability to other populations and settings with different care pathways for diabetes and diabetic complications. |
|-------------|----|-------------------------------------------------------------------------------------------------|----|-----------------------------------------------------------------------------------------------------------------------------------------------------------------------------------------------------------------------------------------------------------------------------------------------------------------------------------------------------------------------------------------------------------------------------------------------------------------------------------------------------------------------------------------------------------------------|

---

|                          |    |                                                                                                                                                                            |    |                                                                                                                                                                                                                                                                                                                                                                                                                  |
|--------------------------|----|----------------------------------------------------------------------------------------------------------------------------------------------------------------------------|----|------------------------------------------------------------------------------------------------------------------------------------------------------------------------------------------------------------------------------------------------------------------------------------------------------------------------------------------------------------------------------------------------------------------|
|                          |    | Discuss both direction and magnitude of any potential bias                                                                                                                 |    |                                                                                                                                                                                                                                                                                                                                                                                                                  |
| Interpretation           | 20 | Give a cautious overall interpretation of results considering objectives, limitations, multiplicity of analyses, results from similar studies, and other relevant evidence | 16 | The study has produced evidence of moderate quality that tight glycaemic control may be beneficial for ulcer healing, and that an outcome derived from ulcer area could be sensitive to glycaemic control as expressed by FCBS. However, we have also demonstrated that a reasonably powered trial would require the involvement of a large number of centres, increasing the complexity of such an undertaking. |
| Generalisability         | 21 | Discuss the generalisability (external validity) of the study results                                                                                                      | 16 | [...] [T]he study was conducted at a single centre in New Zealand, limiting generalisability to other populations and settings with different care pathways for diabetes and diabetic complications.                                                                                                                                                                                                             |
| <b>Other information</b> |    |                                                                                                                                                                            |    |                                                                                                                                                                                                                                                                                                                                                                                                                  |
| Funding                  | 22 | Give the source of funding and the role of the funders for the present study and, if                                                                                       | 17 | <b>Funding</b> This work was supported by the Health Research Council of New Zealand's Feasibility Study grant number 14/605.                                                                                                                                                                                                                                                                                    |

1  
2  
3  
4  
5  
6  
7  
8  
9  
10  
11  
12  
13  
14  
15  
16  
17  
18  
19  
20  
21  
22  
23  
24  
25  
26  
27  
28  
29  
30  
31  
32  
33  
34  
35  
36  
37  
38  
39  
40  
41  
42  
43  
44  
45  
46

---

applicable, for  
the original  
study on which  
the present  
article is based

---

\*Give information separately for cases and controls in case-control studies and, if applicable, for exposed and unexposed groups in cohort and cross-sectional studies.

**Note:** An Explanation and Elaboration article discusses each checklist item and gives methodological background and published examples of transparent reporting. The STROBE checklist is best used in conjunction with this article (freely available on the Web sites of PLoS Medicine at <http://www.plosmedicine.org/>, Annals of Internal Medicine at <http://www.annals.org/>, and Epidemiology at <http://www.epidem.com/>). Information on the STROBE Initiative is available at [www.strobe-statement.org](http://www.strobe-statement.org).

For peer review only

# BMJ Open

## Does intensive glycaemic control promote healing in diabetic foot ulcers? A feasibility study

|                                 |                                                                                                                                                                                                                                                                                                                                                                                                                                                                                                                                           |
|---------------------------------|-------------------------------------------------------------------------------------------------------------------------------------------------------------------------------------------------------------------------------------------------------------------------------------------------------------------------------------------------------------------------------------------------------------------------------------------------------------------------------------------------------------------------------------------|
| Journal:                        | <i>BMJ Open</i>                                                                                                                                                                                                                                                                                                                                                                                                                                                                                                                           |
| Manuscript ID                   | bmjopen-2019-029009.R1                                                                                                                                                                                                                                                                                                                                                                                                                                                                                                                    |
| Article Type:                   | Original research                                                                                                                                                                                                                                                                                                                                                                                                                                                                                                                         |
| Date Submitted by the Author:   | 08-Aug-2019                                                                                                                                                                                                                                                                                                                                                                                                                                                                                                                               |
| Complete List of Authors:       | Dissanayake, Ajith; Counties Manukau Health, Endocrinology<br>Vandal, Alain; Auckland University of Technology, Faculty of Health and Environmental Sciences; Counties Manukau Health, Ko Awatea<br>Boyle, Veronica; Counties Manukau District Health Board, Diabetes and Endocrinology<br>Park, Diane; Auckland University of Technology, Faculty of Health and Environmental Sciences<br>Milne, Bobbie; Middlemore Clinical Trials<br>Grech, Roger; Counties Manukau Health, Podiatry<br>Ng, Anthony; Counties Manukau Health, Podiatry |
| <b>Primary Subject Heading</b>: | Diabetes and endocrinology                                                                                                                                                                                                                                                                                                                                                                                                                                                                                                                |
| Secondary Subject Heading:      | Research methods                                                                                                                                                                                                                                                                                                                                                                                                                                                                                                                          |
| Keywords:                       | Diabetic foot < DIABETES & ENDOCRINOLOGY, WOUND MANAGEMENT, STATISTICS & RESEARCH METHODS                                                                                                                                                                                                                                                                                                                                                                                                                                                 |
|                                 |                                                                                                                                                                                                                                                                                                                                                                                                                                                                                                                                           |

SCHOLARONE™  
Manuscripts

**TITLE**

Does intensive glycaemic control promote healing in diabetic foot ulcers? A feasibility study

**AUTHOR DETAILS**

Ajith Dissanayake\*

Consultant endocrinologist, Counties Manukau District Health Board

Alain C. Vandal\*

Associate Professor, Department of Statistics, The University of Auckland

Veronica Boyle

Endocrinology Registrar, Counties Manukau District Health Board

Diane Park

Research Assistant, Faculty of Health and Environmental Sciences

Auckland University of Technology

Bobbie Milne

Research Nurse, Middlemore Clinical Trials

Roger Grech

Podiatrist, Counties Manukau District Health Board

Anthony Ng

Podiatrist, Counties Manukau District Health Board

\* A. Dissanayake and A.C. Vandal should be considered joint lead authors

**CORRESPONDING AUTHOR**

Associate Professor Alain C. Vandal

PO Box 93311

Research and Evaluation Office, Ko Awatea, Counties Manukau Health,  
Otahuhu, Auckland, New Zealand.

Tel: +64 9 921 9999 ext 7726

Email: [alain.vandal@auckland.ac.nz](mailto:alain.vandal@auckland.ac.nz)

**WORD COUNT**

333 (Abstract)

3152 (Main text)

**ABBREVIATED TITLE**

Glycaemic control for diabetic foot ulcers

## ABSTRACT

**Introduction** One in four diabetes patients will develop a foot ulcer over their lifetime. The role of glycaemic control in the healing of foot ulcers in diabetes patients is not supported by randomised controlled trial (RCT) data.

**Objectives:** To determine the feasibility of an RCT of glycaemic control with intensive insulin therapy in diabetic foot ulcer, by assessing: entry criteria; adherence to control regimen; medication satisfaction; sensitivity of different ulcer-healing endpoints to glycaemic control.

**Design** Two substudies: one cross-sectional, one single-arm prospective.

**Setting** Single-centre secondary care diabetic foot clinic in New Zealand.

**Participants** Substudy 1: 78 participants consisting of all people  $\geq 18$  years with a diabetic foot ulcer presenting to the clinic over 35 weeks in 2015. Substudy 2: 15 participants from Substudy 1 consenting to intensive insulin therapy.

**Intervention** Substudy 1: none. Substudy 2: Intensive insulin therapy with standard podiatry care over 24 weeks.

**Outcome** Substudy 1: Proportion of participants satisfying potential RCT entry criteria; medication satisfaction (DiabMedSat). Substudy 2: Fasting capillary blood glucose (FCBG); index ulcer healing time; index ulcer size; health-related quality of life (HRQoL; EQ-5D-5L and DFS-SF).

**Results** Proportion in Substudy 1 satisfying all entry criteria was 31% (95% CI 21 to 42). FCBG values decreased between baseline and study end (difference -3.7 mmol/L, 95% CI -6.5 to -0.8), suggesting adherence to control regimen; 83% (95% CI 44 to 95) of ulcers healed by 24 weeks. FCBG correlated negatively with medication satisfaction. Ulcer area logarithm was most sensitive to FCBG changes, displaying significant negative correlation with HRQoL outcomes. Detecting a 30%

1  
2  
3 between-group difference in this outcome (80% power,  $\alpha=5\%$ ) requires 220  
4  
5 participants per arm, achievable within 1 year with 15 centres similar to study setting.  
6

7  
8 **Conclusions** An adequately powered RCT requires co-operation between a large  
9  
10 number of centres. Ulcer area logarithm should be primary endpoint.  
11

12 **Trial registration** ANZCTR ACTRN12617001414303  
13  
14

## 15 16 17 **Strengths and limitations of this study** 18

- 19  
20 • First study in 15 years to examine the feasibility of a definitive randomised  
21  
22 controlled trial (RCT) of intensive insulin therapy for diabetic foot ulcers.  
23
- 24 • Use of imaging techniques allowed assessment of various ulcer-size-related  
25  
26 outcomes as potential primary endpoints for an RCT.  
27
- 28 • The target sample size of 20 for Substudy 2, examining the relationship  
29  
30 between ulcer healing and glycaemic control, was not achieved during the  
31  
32 study period.  
33
- 34 • The study was conducted in a single centre in New Zealand, limiting  
35  
36 generalisability to other populations and settings with different pathways for  
37  
38 diabetes and diabetic complications.  
39  
40  
41  
42  
43  
44

## 45 **KEYWORDS**

46  
47 Diabetic Foot  
48 Blood Glucose  
49 Wound Healing  
50 Outcome Assessment (Health Care)  
51 Sample Size  
52  
53  
54  
55  
56  
57  
58  
59  
60



## Introduction

One in four diabetes patients will develop a foot ulcer in their lifetime [1]. Diabetic foot ulcer is one of the most significant complications of diabetes [1–4] and often responds poorly to treatment, with only one-third of those managed in secondary care healing by 3 months and one-half at 6 months [5]. Non-healing ulcers are an important cause of lower extremity amputation. Most notable causes of foot ulceration are peripheral neuropathy, peripheral vascular disease and structural foot disease [6,7]. These factors are linked to hyperglycaemia [8–10] and pathological states associated with diabetes.

A meta-analysis of nine randomised controlled trials in nearly 11,000 participants showed that intensive glycaemic control potentially improved the incidence of diabetic foot ulcer, decreased the risk of amputation and improved sensory nerve function compared with less intensive control [11]. As a result, clinical practice guidelines from the Society for Vascular Surgery, American Podiatric Medical Association, and Society for Vascular Medicine now recommend adequate glycaemic control (glycosylated haemoglobin [HbA1c] <53 mmol/mol) to reduce the incidence of diabetic foot ulcers [1].

The evidence that improved glycaemic control can accelerate the healing of foot ulcers and reduce the incidence of ulceration and amputation remains observational [12–18]. There is no randomised trial evidence that tight glycaemic control improves ulcer wound healing [11]. A previous feasibility study in this area concluded 15 years ago that a definitive randomised trial in this area [19] was not feasible, possibly due to exacting entry criteria. To investigate further whether a randomised controlled trial (RCT) evaluating the efficacy of intensive insulin therapy on diabetic foot ulcer healing is possible, this two-part feasibility study sought appropriate but less

1  
2  
3 stringent trial entry criteria to improve accrual rates (Substudy 1) and sought  
4 appropriate endpoints for such a trial (Substudy 2). In Substudy 2, presence or  
5 absence of peripheral neuropathy, peripheral vascular disease and foot deformities  
6 were noted as they were identified factors in the genesis of diabetic foot ulcers. Data  
7 on microcirculation in the feet were also collected using novel laser imaging  
8 technology. This report focuses on data from Substudy 1 and Substudy 2; the laser  
9 imaging data analysis will be reported separately.

10  
11  
12  
13  
14  
15  
16  
17  
18  
19 The primary objective of Substudy 1 was to estimate the proportion of participants  
20 satisfying the entry criteria for the planned RCT. Entry criteria used in the previous  
21 feasibility study [19] were revised as follows: removing the requirement for chronic  
22 ulcers (>4 weeks); removing the ulcer size criterion (25-2500 mm<sup>2</sup>), and including  
23 participants with a higher HbA1c ( $\geq 58$  mmol/mol), renal disease and/or a history of  
24 hypoglycaemia. Secondary objectives were to estimate the length of the recruitment  
25 period for the intended RCT, and determine participant satisfaction with their  
26 diabetes medication.

27  
28  
29  
30  
31  
32  
33  
34  
35  
36  
37  
38 In Substudy 2, the main objective was to determine a primary endpoint for the RCT  
39 by analysing sensitivity of ulcer healing-related outcomes (ulcer area, change in  
40 ulcer area, and time to complete healing) to glycaemic control accounting for  
41 standard podiatry care. The ulcer healing outcome measure with the best  
42 association with glycaemic control was to be assessed for convergent validity with an  
43 established foot ulcer scale. Secondary objectives included examining the  
44 relationship between adherence (using glycaemic control as proxy), as well as  
45 attendance, and satisfaction with diabetes medication, and evaluating health-related  
46 quality of life (HrQOL) measures in this population.

## Materials and methods

### Setting and Study Design

The study was conducted at the Counties Manukau Health (CMH) Diabetes Foot Clinic in Auckland, New Zealand between 2 February and 28 September 2015, with Substudy 2 follow-up to 20 February 2016. Substudy 1 was a cross-sectional study enrolling all people aged  $\geq 18$  years with diabetes and a current foot ulcer presenting at the CMH Diabetes Foot Clinic over a period of 24 weeks. Substudy 2 was a single-arm interventional study enrolling Substudy 1 participants meeting all entry criteria (Table 1) and treating them with intensive insulin therapy for 24 weeks. The protocol was approved by the New Zealand Northern A Health and Disability Ethics Committee (ref: 14/NTA/195). All participants provided informed written consent.

### Accrual periods and sample size

The accrual period for Substudy 1 (35 weeks) was selected as long as possible while respecting contractual obligations with the study funder. To distinguish between recruitment of existing patients and new patients, we prospectively defined two recruitment periods. During the first period of recruitment (Period A) all patients attending the diabetic foot clinic were to be recruited. Period A was to finish from the moment patients already attending the clinic were recruited, at which point only newly enrolled clinic patients started to be recruited in the study, giving way to Period B (Figure 1).

<< Figure 1 approximately here. >>

Substudy 2 aimed to recruit 20 participants. Assuming 10% attrition, this number is sufficient to estimate the standard deviation of a continuous variable (e.g. ulcer area)

1  
2  
3 with a coefficient of variation inferior to 0.2. This criterion is consistent with the goal  
4  
5 of identifying a sensitive primary endpoint endowed with good precision.  
6  
7

8 <<Table 1 approximately here>>  
9

## 10 **Patient and Public Involvement**

11  
12  
13 Patients' priorities, experience and preferences were taken into account through the  
14  
15 clinical experience of the study team, who devised the research question associated  
16  
17 with the intended full study. The participants were not involved in the design of this  
18  
19 study; however, one of the objectives of the feasibility study was to obtain feedback  
20  
21 from participants that would inform the design of a potential larger study. Patients  
22  
23 were not involved in the recruitment or conduct of the study. The participants will be  
24  
25 provided access to the research paper. The results of the study will be displayed in  
26  
27 the podiatry clinic where the participants attend.  
28  
29  
30

## 31 **Study procedures and outcomes**

32  
33  
34 Substudy 1 participants completed a Diabetes Medication Satisfaction (DiabMedSat)  
35  
36 questionnaire [20,21]. Their foot wound(s) (index ulcers) were inspected, and entry  
37  
38 criteria status (Table 1) and demographic data recorded. In Substudy 2, visits  
39  
40 occurred weekly between weeks 1 (baseline) and 4, then at 6, 8, 12, 16, 20 and 24  
41  
42 weeks, or until the index ulcers healed. The following were undertaken at each visit:  
43  
44 ulcer examination: digital photographic planimetry of ulcer area (using the  
45  
46 SilhouetteStar camera, ARANZ Medical, New Zealand); FCBG measurement (in  
47  
48 mmol/L); medication review; and adverse events assessment. FCBG was used in  
49  
50 the analyses as a measure of glycaemic control [22] and as a proxy for adherence  
51  
52 [23]. HbA1c was assessed at baseline and at the end of trial, providing an  
53  
54 assessment of chronic hyperglycaemia. By contrast, fasting capillary glucose or  
55  
56 mean daily capillary glucose may provide evidence of acute improvement of  
57  
58  
59  
60

1  
2  
3 glycaemia in a short-term clinical trial[22]. In addition, participants completed three  
4  
5 questionnaires at each visit: DiabMedSat [20,21], EuroQol 5 Dimensions 5 Levels  
6  
7 (EQ-5D-5L) [24,25] and Diabetic Foot Ulcer Scale-Short Form (DFS-SF) [26].  
8  
9

## 10 **Intervention**

11  
12  
13 On entry to Substudy 2, intermediate- or long-acting insulin was initiated or adjusted,  
14  
15 and given in addition to usual oral hypoglycaemic tablet therapy (first line metformin,  
16  
17 second line sulphonylurea). In addition participants received cholesterol lowering  
18  
19 medication, anti-hypertensives and aspirin to prevent cardiovascular disease  
20  
21 consistent with international guidelines [27]. Short-acting mealtime insulin was  
22  
23 provided as appropriate. The goal was to maintain FCBG at 4–7 mmol/L, with  $\leq 2$   
24  
25 episodes of mild hypoglycaemia per week. Within these parameters the choice of  
26  
27 regimen was determined by the Diabetes Nurse Specialist.  
28  
29

30  
31 Substudy 2 participants received usual podiatry care at each visit, including ulcer  
32  
33 debridement, orthotics prescription and adjustments, antibiotics if indicated and  
34  
35 education.  
36  
37

## 38 **Statistical analyses**

### 39 *Substudy 1*

40  
41  
42 Descriptive statistics were produced for participant demographic characteristics,  
43  
44 recruitment rate, entry criteria fulfilment and DiabMedSat subscores. Multivariate  
45  
46 analysis of variance (MANOVA) was used to detect differences in subscores based  
47  
48 on demographic or participant characteristics. A Poisson exact test was used to  
49  
50 compare recruitment rates over two recruitment periods and mixed logistic  
51  
52 regression used to compare differences in entry criteria fulfilment between the  
53  
54 periods. Indicators of criterion satisfaction were fitted jointly by themselves in a first  
55  
56  
57  
58  
59  
60

1  
2  
3 model, and interacting with period in a second model. Models were compared using  
4  
5 deviance tests.  
6

### 7 *Substudy 2*

8  
9  
10 The analysis set for this feasibility study consisted of all participants having initiated  
11  
12 treatment. All analyses were carried out on the index ulcers, present at the first visit.  
13  
14 All participants had a single index ulcer.  
15

16  
17 Linear mixed models were used to determine the relationship between four different  
18  
19 ulcer area-related outcomes at each visit (ulcer area in cm<sup>2</sup>, log[ulcer area+0.01],  
20  
21 absolute and relative rates of change in ulcer area) and glycaemic control. (The  
22  
23 value of 0.01 in the logarithmic endpoint has been previously validated as a  
24  
25 surrogate marker of ulcer healing [28] was chosen based on the data to improve the  
26  
27 normality of the outcome.) FCBG was the fixed effect and participant the random  
28  
29 effect. Time-to-healing was considered as a fifth possible outcome. A Kaplan-Meier  
30  
31 estimate of ulcer persistence probability was produced and Cox regression used to  
32  
33 estimate the hazard ratio of ulcer healing under changes in FCBG, taken as a time-  
34  
35 dependent covariate. Time- and/or baseline ulcer area-adjusted estimates, as well  
36  
37 as unadjusted estimates, were produced to assess potential confounding, as tight  
38  
39 management in a foot clinic may promote ulcer healing in several ways. The most  
40  
41 sensitive outcome was selected by consideration of its adjusted observed  
42  
43 significance level and its equivalent Cohen's effect size where appropriate. To  
44  
45 estimate correlations and their 95% confidence intervals (CI) using all available  
46  
47 longitudinal data, we fitted outcomes jointly using a heterogeneous compound  
48  
49 symmetry covariance model, and using only intercepts as fixed effects. We thus  
50  
51 obtained correlations between DFS-SF subscores and selected ulcer healing  
52  
53  
54  
55  
56  
57  
58  
59  
60

1  
2  
3 outcome; between DiabMedSat subscores and FCBG; and between DFS-SF  
4  
5 subscores and EQ-5D-5L.  
6

7  
8 Descriptive statistics were produced on completed follow-ups (defined as healing  
9  
10 before 24 weeks or attending the 24-week visit) and attended visits. Attendance  
11  
12 probability was regressed on the most recently available FCBG, measure of ulcer  
13  
14 area and DiabMedSat subscores using mixed logistic regression. The final  
15  
16 attendance model was selected using AIC.  
17

18  
19 No data were missing for time-to-healing analyses. Other analyses all involved  
20  
21 mixed models on longitudinal data, known to alleviate selection bias due to  
22  
23 missingness [29].  
24  
25

## 26 27 **Results**

### 28 29 **Participants**

30  
31 <<Table 2 approximately here.>>  
32

33  
34 Seventy-eight participants (all unique clinic visitors during the recruitment period)  
35  
36 were enrolled in Substudy 1 (Table 2). Mean age was 57 years (SD 14). The majority  
37  
38 were men and most were of Pacific or European ethnicity. No data were missing for  
39  
40 Substudy 1. All participants were identified as having some measure of foot  
41  
42 deformity, judged unlikely to affect ulcer healing by the treating podiatrists. However,  
43  
44 no objective measure of foot deformity, to our knowledge, has been assessed for  
45  
46 association with ulcer healing.  
47  
48

49  
50 Seventeen participants entered Substudy 2. One withdrew consent after Visit 1 and  
51  
52 another was healed on Visit 1, leaving 15 participants in the analysis set, assessed  
53  
54 on a total of 90 occasions.  
55  
56  
57  
58  
59  
60

## Completeness

Two participants with unhealed ulcers did not attend the 24-week visit (13%, 95% CI 2 to 40). Of the 102 scheduled visits, 12 were missed, yielding an attendance proportion of 91% (95% CI 79 to 96), accounting for clustering by participant. Average follow-up time to healing or last visit was 17.6 weeks (SD 7.8). Clinical constraints or patient choice prevented some measurements from being taken, yielding completeness proportions for specific outcomes between 78% (DiabMedSat and FCBG) and 85% (ulcer area).

## Recruitment rate and entry criteria

Period A (as defined earlier) finished after 6 weeks, and was the most active with 42 participants recruited compared with 36 participants over the remaining 29 weeks, forming Period B.

All participants satisfied criterion IC1, 78.2% met IC2, 98.7% met IC3, 73.1% met IC4 and 57.7% met IC5. Twenty-four participants (30.8%, 95% CI 20.8 to 42.2) met all criteria. Removal of any single criteria increased eligibility proportion appreciably only in the case of IC2 (to 37.2%, 95% CI 26.5 to 48.9) and IC5 (to 38.5%, 95% CI 27.7 to 50.2). The probabilities of participants meeting entry criteria differed between periods A and B (Figure 2); the criterion-period interaction term was significant ( $P=0.009$ ). The A-to-B rate ratio of eligibility to a full study was 4.1 (95% CI 1.8 to 9.2). The eligibility rate in period B was 0.45 participant per week (95% CI 0.24 to 0.77).

<<Figure 2 approximately here.>>

## Diabetes Medication Satisfaction

Higher scores on the DiabMedSat subscales indicate increased satisfaction for all three subscales. The subscale histograms are displayed in Figure 3. Median score



1  
2  
3 for the Efficacy subscale was 63.3 (interquartile range [IQR] 26.7), and was  
4 numerically lower than those of the Burden (81.8 [IQR 22.8]) and Symptom  
5 subscales (80.0 [IQR 16.0]). MANOVA demonstrated no significant variation in  
6 subscale scores based on ethnicity, sex or diabetes duration, but there was  
7 significant variation in the Burden ( $P = 0.005$ ) and Symptom ( $P=0.026$ ) scores based  
8 on age (generally higher in older participants).  
9

10  
11  
12 <<Figure 3 approximately here.>>  
13  
14

### 15 16 17 **Glycaemic control**

18  
19  
20 FCBG values during the study indicated that participants were generally adhering to  
21 their glycaemic control regimen. Between study end and baseline, the mean  
22 difference in FCBG was -3.7 mmol/L (95% CI -6.5 to -0.8) and in HbA1c was -9.4  
23 mmol/mol (95% CI -19.0 to 0.3). The fasting blood glucose of participants of  
24 Substudy 2 over time are shown in Figure 4.  
25  
26  
27  
28  
29  
30  
31  
32

33  
34 << Figure 4 approximately here. >>  
35  
36

### 37 38 **Selection of primary endpoint for RCT**

39  
40 <<Table 3 approximately here.>>  
41

42 Twelve Substudy 2 participants experienced complete healing between weeks 3 and  
43 24; the remaining three had unhealed ulcers at the time of their last visit on or before  
44 week 24. Median ulcer-healing time was 7 weeks. The Kaplan-Meier estimate of the  
45 proportion of ulcers not healing by week 24 was 16.7% (95% CI 5.0 to 56.1). The Cox  
46 model showed no significant association between time to ulcer healing and FCBG  
47 (Table 3).  
48  
49  
50  
51  
52

53  
54  
55 Log(ulcer area in  $\text{cm}^2+0.01$ ) (hereafter “log of ulcer area”) and ulcer area relative rate  
56 of change were the only ulcer healing outcomes sensitive to change in FCBG (Table  
57 3). The former was selected as most sensitive to changes in FCBG, with effect size  
58  
59  
60

of 0.08 per mmol/L increase in FCBG, adjusted for both time and baseline value.

Time adjustment was intended to account for non-glycaemia-related improvements and interventions such as podiatric care. Between- and within-participant outcome variances were estimated at 1.3 and 0.4 respectively.

### **Validation of selected outcome with QOL measures**

<<Table 4 approximately here.>>

DFS-SF scores tended to increase over time (i.e. improved HrQOL); increases reached statistical significance for four of the six subscales (Leisure [ $P=0.05$ ], Dependence [ $P=0.01$ ], Negative emotion [ $P=0.001$ ] and Worried about ulcers [ $P=0.04$ ]). All six subscales showed statistically significant, moderate-to-strong negative correlation with log of ulcer area (Table 4).

### **Participant satisfaction and adherence to intensive insulin therapy**

Glycaemia levels displayed weak to moderate negative correlation with the DiabMedSat scores. The correlation of FCBG with the Burden subscale was -0.35 (95% CI -0.59 to -0.09;  $P=0.01$ ), with the Efficacy subscale -0.42 (95% CI -0.61 to -0.18;  $P=0.0009$ ) and with the Symptoms subscale -0.21 (95% CI -0.47 to 0.08,  $P=0.15$ ).

### **Health-related QOL**

The EQ-5D-5L VAS displayed moderate to strong positive correlation with all six DFS-SF subscale scores (Table 4).

### **Modelling of attendance**

The model explaining attendance with smallest AIC involved the DiabMedSat Burden score only, with an attendance odds ratio of 1.78 (95% CI 1.26 to 2.51;  $P=0.001$ ) per 10-point score increase.

## Discussion

### Key findings

This feasibility study showed that by using less stringent entry criteria, more people with diabetic foot ulcers attending our foot clinic (30%) may be eligible for a proposed RCT investigating the efficacy of an intensive insulin regimen on diabetic foot ulcer healing than reported in a previous feasibility study (0.5% [1/200]) [19]. The study also showed that the primary endpoint of log of ulcer area, with ulcer area measured using digital photographic planimetry, may be sensitive enough to glycaemic control to base an RCT on in this population.

In terms of design and conduct of an RCT of intensive glycaemic control versus standard care in people with diabetic foot ulcers, analysis showed that the largest gains in eligibility from removal of a single criterion would occur by waiving IC2 (type 1 or type 2 diabetes for greater than one year with an HbA1c of >60mmol/mol) or IC5. IC5 cannot of course be waived, since participant consent is compulsory in any ethical clinical trial. However, if glycaemic control is efficacious in individuals with recently developed diabetes, IC2 could perhaps advantageously be relaxed. Those with recent onset diabetes maybe different to those with long standing diabetes in ways that impact upon ulcer healing. On the other hand, those with recently diagnosed diabetes will likely have years of exposure to risk factors they share with those with long standing diabetes that predispose them to ulcer formation also [30]. Further findings are indications that acting on the medication burden may improve attendance and that acting on medication satisfaction in general, and satisfaction with efficacy in particular, may improve adherence to the control regimen. In both cases, however, the evidence obtained is only correlational and not causal.

## Relationship to other studies

Ulcer healing data suggested an early beneficial effect of intensive insulin therapy; median healing time was 7 weeks after the initial visit, and by week 21 an estimated 17% of ulcers had not healed. Over a similar timeframe, much lower healing rates have been reported with standard care (e.g. 31% at 20 weeks in a meta-analysis [31]). Even when standard care included insulin, a retrospective cohort study found that only 30% of ulcers had healed after 1.1 month [32]. The baseline mean HbA1c was lower in the participants of that study (7.9% or 63mmol/mol) compared to our own (10.8% or 94mmol/mol). While this finding is promising, a randomised controlled trial is needed to confirm that this is the effect of intensive blood glucose control. There are other factors that may account for more rapid ulcer healing in our study such as the high (weekly) frequency of the first four visits in Substudy 2, allowing more opportunities for treatment such as wound debridement, and orthotic or medication adjustments.

## Implications for a full study

The log of the ulcer area outcome proved sensitive to glycaemic control even controlling for time since study entry, and was correlated with DFS-SF subscores, supporting the use of this measure. This is consistent with prior validation of log ulcer area as a surrogate end point for ulcer healing [28]. Using this measure as primary endpoint, a target reduction in ulcer size of 30% would correspond to a 3 mmol/L average difference in FCBG (corresponding to the difference between the lower bounds of normal glycaemia and a diagnosis of diabetes), with intensive glycaemic control versus standard care. In an RCT, 220 participants per arm would be required to detect a between-group decrease of 30% with 80% power at a 5% significance level. At the differential eligibility rates observed in both periods and assuming a loss

1  
2  
3 to follow-up of 10%, such a number could be achieved within about one year if 15  
4  
5 centres similar to ours were recruiting participants.  
6

7  
8 Good reductions in FCBG over the first 4 weeks of intensive insulin therapy were  
9  
10 seen, but more variable levels observed afterwards. To achieve optimal  
11  
12 improvements in glycaemic control over the course of a longer-term RCT more  
13  
14 regular visits may be necessary after the first 4-6 weeks of therapy than were used in  
15  
16 our feasibility study and more daytime FCBG recordings done to optimise therapy.  
17

18  
19 The EQ-5D VAS appeared to have good convergent validity with the specialised  
20  
21 DFS-SF, indicating its appropriateness as a generic QOL measure in our study  
22  
23 population, opening the door to valid economic analyses. We also realise the  
24  
25 importance of objective quantification of neuropathy, peripheral vascular disease and  
26  
27 foot deformities enabling stratification at randomisation in the larger trial as they are  
28  
29 the most notable causative factors of diabetic foot ulceration [11].  
30  
31

32  
33 Tight glycaemic control relies on long-term patient adherence [1]. Satisfied patients  
34  
35 are more likely to adhere to recommendations regarding not only medication use and  
36  
37 follow-up visits but also dietary habits and physical activity [33]. Our findings showed  
38  
39 that our participants' perception of diabetes medication burden was strongly  
40  
41 associated with adherence (as determined by the surrogate marker FCBG) and  
42  
43 attendance, suggests, although does not prove, that intervening on burden may  
44  
45 promote attendance.  
46  
47

## 48 49 **Limitations**

50  
51  
52 Some limitations temper the interpretation of our results. The most important  
53  
54 limitation was that Substudy 2 did not reach the target sample size of 20. This  
55  
56 shortfall was largely due to availability of personnel and funder timelines. These  
57  
58 issues, particularly around staffing, have the potential to affect any future RCT.  
59  
60

1  
2  
3 Moreover, the study was conducted at a single centre in New Zealand, limiting  
4 generalisability to other populations and settings with different care pathways for  
5 diabetes and diabetic complications.  
6  
7

8  
9  
10 Another limitation of this study is that FCBG was the only surrogate for medication  
11 adherence. The addition of other surrogates such as a record of whether  
12 prescriptions had been filled would. Furthermore, in a study aiming to evaluate the  
13 four times a day blood glucose testing is preferable to FCBG and HbA1c.  
14  
15

16  
17  
18 Non-adherence to standard care was an exclusion criterion of this study. This was  
19 included so that the impact of glycaemic control would be the focus of this study.  
20  
21 However, this criterion limits the application of the study to the real world as non-  
22 adherence is a major issue in most real-life clinical settings.  
23  
24  
25  
26  
27

## 28 **Conclusion**

29  
30  
31 The study has produced evidence of moderate quality that tight glycaemic control  
32 may be beneficial for ulcer healing, and that an outcome derived from ulcer area  
33 could be sensitive to glycaemic control as expressed by FCBG.  
34  
35  
36

37  
38 This feasibility study is the first since 2005 to investigate issues relevant to the  
39 initiation of a definitive RCT evaluating the impact of intensive insulin therapy on  
40 ulcer healing in people with diabetes. The results of such a trial would be useful to  
41 inform evidence-based clinical practice guidelines. However, we have also  
42 demonstrated that a reasonably powered trial would require the involvement of a  
43 large number of centres, increasing the complexity of such an undertaking.  
44  
45  
46  
47  
48  
49  
50  
51  
52  
53  
54

55  
56  
57 **Acknowledgements** Medical writing assistance was provided by Nicola Ryan,  
58 independent medical writer. The authors thank Benjamin Elliott (independent data  
59  
60

1  
2  
3 manager), Lawrence Kingi (podiatrist, Counties Manukau Health) and Dr John Baker  
4  
5 (Middlemore Clinical Trials) for their assistance with this study.  
6  
7

8 **Contributors** A.C.V. and A.D. designed the study and co-wrote the manuscript  
9  
10 with V.B. A.D. oversaw the intervention and contributed to the discussion. A.C.V.  
11  
12 contributed to data management, data monitoring and analysis planning and  
13  
14 conduct. D.P. contributed to statistical analyses. B.M. coordinated the research. R.G.  
15  
16 and A.N. provided podiatric care and contributed to discussion. A.D. and A.C.V. take  
17  
18 responsibility for the contents of the article, study design, access to data and the  
19  
20 decision to submit and publish the results.  
21  
22

23  
24 **Funding** This work was supported by the Health Research Council of New  
25  
26 Zealand's Feasibility Study grant number 14/605.  
27

28 **Disclaimer** The joint lead authors A.D. and A.C.V. affirm that the manuscript is an  
29  
30 honest, accurate and transparent account of the study being reported; that no  
31  
32 important aspects of the study have been omitted except as noted in the text, and  
33  
34 that any discrepancies from the study as planned have been explained.  
35  
36

37 **Competing interests** None declared.  
38

39 **Patient consent** Obtained.  
40

41  
42 **Ethics approval** Ethics approval was given for the study by the New Zealand  
43  
44 Northern A Health and Disability Ethics Committee, ethics approval number  
45  
46 14/NTA/195.  
47  
48

49 **Provenance and peer review** Not commissioned; externally peer-reviewed.  
50

51 **Data sharing statement** Data are available. Please contact corresponding author.  
52  
53  
54  
55  
56  
57  
58  
59  
60

## References

1. Hingorani A, LaMuraglia GM, Henke P, Meissner MH, Loretz L, Zinszer KM, et al. The management of diabetic foot: A clinical practice guideline by the Society for Vascular Surgery in collaboration with the American Podiatric Medical Association and the Society for Vascular Medicine. *J Vasc Surg* [Internet]. 2016 Feb 1;63(2):3S-21S. Available from: <https://doi.org/10.1016/j.jvs.2015.10.003>
2. Australian Institute of Health and Welfare [Internet]. 2008. Available from: <http://www.aihw.gov.au/WorkArea/DownloadAsset.aspx?id=6442453674>
3. Ragnarson Tennvall G, Apelqvist J. Health-Economic Consequences of Diabetic Foot Lesions. *Clin Infect Dis* [Internet]. 2004 Aug 1;39(Supplement\_2):S132–9. Available from: <https://doi.org/10.1086/383275>
4. Stockl K, Vanderplas A, Tafesse E, Chang E. Costs of Lower-Extremity Ulcers Among Patients With Diabetes. *Diabetes Care* [Internet]. 2004 Sep 1;27(9):2129 LP – 2134. Available from: <http://care.diabetesjournals.org/content/27/9/2129.abstract>
5. Treece K, Macfarlane R, Pound N, Game F, Jeffcoate W. Validation of a system of foot ulcer classification in diabetes mellitus. Vol. 21, *Diabetic medicine : a journal of the British Diabetic Association*. 2004. 987–991 p.
6. Clayton W, Elasy TA. A Review of the Pathophysiology, Classification, and Treatment of Foot Ulcers in Diabetic Patients. *Clin Diabetes* [Internet]. 2009 Apr 1;27(2):52 LP – 58. Available from: <http://clinical.diabetesjournals.org/content/27/2/52.abstract>
7. Schaper NC. Lessons from Eurodiale. *Diabetes Metab Res Rev* [Internet]. 2012 Feb 1;28(S1):21–6. Available from: <https://doi.org/10.1002/dmrr.2266>
8. Ikem R, Ikem I, Adebayo O, Soyoye D. An assessment of peripheral vascular disease in patients with diabetic foot ulcer. *Foot* [Internet]. 2010;20(4):114–7. Available from: <http://www.sciencedirect.com/science/article/pii/S0958259210000568>
9. Ogbera OA, Osa E, Edo A, Chukwum E. Common Clinical Features of Diabetic Foot Ulcers: Perspectives From a Developing Nation. *Int J Low Extrem Wounds* [Internet]. 2008 May 19;7(2):93–8. Available from: <https://doi.org/10.1177/1534734608318236>
10. Tesfaye S, Selvarajah D. Advances in the epidemiology, pathogenesis and management of diabetic peripheral neuropathy. *Diabetes Metab Res Rev* [Internet]. 2012 Feb 1;28(S1):8–14. Available from: <https://doi.org/10.1002/dmrr.2239>
11. Fernando ME, Seneviratne RM, Tan YM, Lazzarini PA, Sangla KS, Cunningham M, et al. Intensive versus conventional glycaemic control for treating diabetic foot ulcers. *Cochrane Database Syst Rev* [Internet]. 2016;(1). Available from: <https://doi.org/10.1002/14651858.CD010764.pub2>
12. Hasan R, Firwana B, Elraiyah T, Domecq JP, Prutsky G, Nabhan M, et al. A systematic review and meta-analysis of glycemic control for the prevention of diabetic foot syndrome. *J Vasc Surg* [Internet]. 2016 Feb 1;63(2):22S-28S.e2. Available from: <https://doi.org/10.1016/j.jvs.2015.10.005>
13. Brem H, Sheehan P, Rosenberg HJ, Schneider JS, Boulton AJM. Evidence-Based Protocol for Diabetic Foot Ulcers. *Plast Reconstr Surg* [Internet]. 2006;117(7S). Available from: [https://journals.lww.com/plasreconsurg/Fulltext/2006/06001/Evidence\\_Based\\_Protocol\\_for\\_Diabetic\\_Foot\\_Ulcers.21.aspx](https://journals.lww.com/plasreconsurg/Fulltext/2006/06001/Evidence_Based_Protocol_for_Diabetic_Foot_Ulcers.21.aspx)
14. Christman AL, Selvin E, Margolis DJ, Lazarus GS, Garza LA. Hemoglobin A1c Predicts



- 1
  - 2
  - 3
  - 4
  - 5
  - 6
  - 7
  - 8
  - 9
  - 10
  - 11
  - 12
  - 13
  - 14
  - 15
  - 16
  - 17
  - 18
  - 19
  - 20
  - 21
  - 22
  - 23
  - 24
  - 25
  - 26
  - 27
  - 28
  - 29
  - 30
  - 31
  - 32
  - 33
  - 34
  - 35
  - 36
  - 37
  - 38
  - 39
  - 40
  - 41
  - 42
  - 43
  - 44
  - 45
  - 46
  - 47
  - 48
  - 49
  - 50
  - 51
  - 52
  - 53
  - 54
  - 55
  - 56
  - 57
  - 58
  - 59
  - 60
- Healing Rate in Diabetic Wounds. *J Invest Dermatol* [Internet]. 2011 Oct 1;131(10):2121–7. Available from: <https://doi.org/10.1038/jid.2011.176>
15. Lan C-CE, Liu I-H, Fang A-H, Wen C-H, Wu C-S. Hyperglycaemic conditions decrease cultured keratinocyte mobility: implications for impaired wound healing in patients with diabetes. *Br J Dermatol* [Internet]. 2008 Nov 1;159(5):1103–15. Available from: <https://doi.org/10.1111/j.1365-2133.2008.08789.x>
  16. Marston WA. Risk factors associated with healing chronic diabetic foot ulcers: The importance of hyperglycemia. Vol. 52, *Ostomy/wound management*. 2006. 26–8, 30, 32 passim p.
  17. Miner A, Kirsner RS. Diabetic Control Affects Healing Rates in Neuropathic and Vasculopathic Patients. *J Invest Dermatol* [Internet]. 2011 Oct 1;131(10):1962. Available from: <https://doi.org/10.1038/jid.2011.269>
  18. Rathsmann B, Jensen-Urstad K, Nyström T. Intensified insulin treatment is associated with improvement in skin microcirculation and ischaemic foot ulcer in patients with type 1 diabetes mellitus: a long-term follow-up study. *Diabetologia* [Internet]. 2014;57(8):1703–10. Available from: <https://doi.org/10.1007/s00125-014-3248-2>
  19. Idris I, Game F, Jeffcoate W. Does close glycaemic control promote healing in diabetic foot ulcers? Report of a feasibility study. *Diabet Med* [Internet]. 2005 Aug 1;22(8):1060–3. Available from: <https://doi.org/10.1111/j.1464-5491.2005.01606.x>
  20. Brod M, Christensen T, Kongsø JH, Bushnell DM. Examining and interpreting responsiveness of the Diabetes Medication Satisfaction measure. *J Med Econ* [Internet]. 2009 Dec 1;12(4):309–16. Available from: <https://doi.org/10.3111/13696990903337017>
  21. Brod M, Skovlund SE, Wittrup-Jensen KU. Measuring the Impact of Diabetes Through Patient Report of Treatment Satisfaction, Productivity and Symptom Experience. *Qual Life Res* [Internet]. 2006;15(3):481–91. Available from: <https://doi.org/10.1007/s11136-005-1624-6>
  22. Monnier L, Lapinski H, Colette C. Contributions of Fasting and Postprandial Plasma Glucose Increments to the Overall Diurnal Hyperglycemia of Type 2 Diabetic Patients. *Diabetes Care* [Internet]. 2003 Mar 1;26(3):881 LP – 885. Available from: <http://care.diabetesjournals.org/content/26/3/881.abstract>
  23. Pascal I, Ofoedu J, Uchenna N, Nkwa A, Uchamma G. Blood glucose control and medication adherence among adult type 2 diabetic Nigerians attending a primary care clinic in under-resourced environment of Eastern Nigeria. *N Am J Med Sci*. 2012;4(7):310–5.
  24. Herdman M, Gudex C, Lloyd A, Janssen MF, Kind P, Parkin D, et al. Development and preliminary testing of the new five-level version of EQ-5D (EQ-5D-5L). *Qual Life Res* [Internet]. 2011;20(10):1727–36. Available from: <https://doi.org/10.1007/s11136-011-9903-x>
  25. Janssen MF, Pickard AS, Golicki D, Gudex C, Niewada M, Scalone L, et al. Measurement properties of the EQ-5D-5L compared to the EQ-5D-3L across eight patient groups: a multi-country study. *Qual Life Res* [Internet]. 2013;22(7):1717–27. Available from: <https://doi.org/10.1007/s11136-012-0322-4>
  26. Bann CM, Fehnel SE, Gagnon DD. Development and validation of the Diabetic Foot Ulcer Scale-Short Form (DFS-SF). *Pharmacoeconomics* [Internet]. 2003;21(17):1277–90. Available from: <https://doi.org/10.2165/00019053-200321170-00004>
  27. International Diabetes Federation. Global guideline for type 2 diabetes. 2012;

- 1  
2  
3  
4  
5  
6  
7  
8  
9  
10  
11  
12  
13  
14  
15  
16  
17  
18  
19  
20  
21  
22  
23  
24  
25  
26  
27  
28  
29  
30  
31  
32  
33  
34  
35  
36  
37  
38  
39  
40  
41  
42  
43  
44  
45  
46  
47  
48  
49  
50  
51  
52  
53  
54  
55  
56  
57  
58  
59  
60
28. Margolis DJ, Gelfand JM, Hoffstad O, Berlin JA. Surrogate End Points for the Treatment of Diabetic Neuropathic Foot Ulcers. *Diabetes Care* [Internet]. 2003 Jun 1;26(6):1696 LP – 1700. Available from: <http://care.diabetesjournals.org/content/26/6/1696.abstract>
  29. Fielding S, Fayers P, Ramsay CR. Analysing randomised controlled trials with missing data: Choice of approach affects conclusions. *Contemp Clin Trials* [Internet]. 2012 May 1;33(3):461–9. Available from: <https://doi.org/10.1016/j.cct.2011.12.002>
  30. Lee CC, Perkins BA, Kayaniyil S, Harris SB, Retnakaran R, Gerstein HC, et al. Peripheral Neuropathy and Nerve Dysfunction in Individuals at High Risk for Type 2 Diabetes: The PROMISE Cohort. *Diabetes Care* [Internet]. 2015 May 1;38(5):793 LP – 800. Available from: <http://care.diabetesjournals.org/content/38/5/793.abstract>
  31. Margolis DJ, Kantor J, Berlin JA. Healing of diabetic neuropathic foot ulcers receiving standard treatment. A meta-analysis. *Diabetes Care* [Internet]. 1999 May 1;22(5):692 LP – 695. Available from: <http://care.diabetesjournals.org/content/22/5/692.abstract>
  32. Vatankhah N, Jahangiri Y, Landry GJ, Moneta GL, Azarbal AF. Effect of systemic insulin treatment on diabetic wound healing. *Wound Repair Regen* [Internet]. 2017/02/20. 2017 Apr;25(2):288–91. Available from: <https://www.ncbi.nlm.nih.gov/pubmed/28120507>
  33. Al-Aujan S, Al-Aqeel S, Al-Harbi A, Al-Abdulltif E. Patients' satisfaction with diabetes medications in one hospital, Saudi Arabia. *Patient Prefer Adherence* [Internet]. 2012 Oct 12;6:735–40. Available from: <https://www.ncbi.nlm.nih.gov/pubmed/23077410>

## Figure legends

Figure 1 – Substudy 1 recruitment flow diagram

Figure 2 – Point estimate and confidence interval of probability of each criterion

being met by recruitment period. Period A was 0-5 weeks and Period B was 6-35 weeks. FC, full criteria; EC, exclusion criterion; IC, inclusion criterion.

Figure 3 – Histograms of participant scores on the three subscales of the Diabetes Medication Satisfaction questionnaire: (a) Burden, (b) Symptoms and (c) Efficacy subscales. Subscales are scored from 0-100, higher scores indicating greater satisfaction.

Figure 4. Fasting capillary blood glucose against time from study entry during intensive insulin therapy in the 15 participants of substudy 2

## Tables

Table 1 Entry criteria assessed in Substudy 1

| Criteria  | Notation | Description                                                                                                                                                   |
|-----------|----------|---------------------------------------------------------------------------------------------------------------------------------------------------------------|
| Inclusion | IC1      | Male or female aged $\geq 18$ years                                                                                                                           |
|           | IC2      | Type 1 or Type 2 diabetes mellitus for more than one year with an HbA1c $\geq 60$ mmol/mol                                                                    |
|           | IC3      | Incident foot ulcer(s) located below the level of the malleoli                                                                                                |
|           | IC4      | Able and willing to undertake home blood glucose monitoring and administer insulin up to 4 times daily under the supervision of the diabetes nurse specialist |
|           | IC5      | Able and willing to provide informed consent to participate in the study                                                                                      |
| Exclusion | EC1      | Ulcers with radiological features of osteomyelitis                                                                                                            |
|           | EC2      | Significant peripheral vascular disease under consideration for re-vascularisation                                                                            |
|           | EC3      | Significant bone deformity as determined by the investigator which may delay wound healing                                                                    |
|           | EC4      | Non-adherence to standard care                                                                                                                                |
|           | EC5      | Any other disease or condition in the opinion of the investigator could make them unsuitable for entry                                                        |
| Full      | FC       | All inclusion criterion satisfied (5-Yes) and all exclusion criterion satisfied (5-No)                                                                        |

EC, exclusion criteria; HbA1c, glycosylated haemoglobin; IC, inclusion criteria.

Table 2 Characteristics of participants included in both substudies

|                                    | Substudy 1<br>Participants (n=78) | Substudy 2<br>Participants (n=15) |
|------------------------------------|-----------------------------------|-----------------------------------|
| Median age (IQR), years            | 58.5 (18.2)                       | 51 (16.5)                         |
| Women, n (%)                       | 30 (38.5)                         | 6 (40)                            |
| Mean baseline HbA1c (SD), mmol/mol | Not collected                     | 93 (29)                           |
| Mean baseline FCBG (SD), mmol/L    | Not collected                     | 11.3 (5.7)                        |
| Ethnicity, n (%)                   |                                   |                                   |
| Asian                              | 5 (6.4)                           | 1 (6.7)                           |
| European                           | 27 (34.6)                         | 4 (26.7)                          |
| Māori                              | 13 (16.7)                         | 2 (13.3)                          |
| Pacific                            | 33 (42.3)                         | 7 (46.7)                          |
| Type 1 diabetes mellitus, n (%)    | 12 (15.4)                         | 3 (20.0)                          |
| Type 2 diabetes mellitus, n (%)    | 66 (84.6)                         | 12 (80.0)                         |
| Duration of diabetes, n (%)        |                                   |                                   |
| 0-10 years                         | 15 (19.2)                         | 3 (20.0)                          |
| 10-20 years                        | 31 (39.7)                         | 6 (40.0)                          |
| 20-30 years                        | 22 (28.2)                         | 4 (26.7)                          |
| 30-40 years                        | 7 (9.0)                           | 2 (13.3)                          |
| 40-50 years                        | 3 (3.9)                           | 0 (0.0)                           |
| Peripheral neuropathy, n (%)       | Not collected                     | 15 (100.0)                        |
| Peripheral vascular disease, n (%) | Not collected                     | 1 (6.7)                           |

IQR, interquartile range; HbA1c: glycosylated haemoglobin; FCBG: fasting capillary blood glucose

**Table 3 Unadjusted and adjusted regression results for five ulcer-healing endpoints against fasting capillary blood glucose**

| Ulcer outcome                                     | Adjustment status | Change in outcome per 1 mmol/L increase in FCBG |                 | Equivalent effect size | P      |    |
|---------------------------------------------------|-------------------|-------------------------------------------------|-----------------|------------------------|--------|----|
|                                                   |                   | Estimate                                        | 95% CI          |                        |        |    |
| Ulcer area (cm <sup>2</sup> ) †                   | Unadjusted        | 0.010                                           | [-0.041,0.062]  | 0.004                  | 0.69   |    |
|                                                   | Adjusted§         | 0.004                                           | [-0.024,0.032]  | 0.001                  | 0.77   |    |
| Log(ulcer area+0.01) †                            | Unadjusted        | 0.134                                           | [0.049,0.214]   | 0.10                   | 0.002  | ** |
|                                                   | Adjusted§         | 0.114                                           | [0.020,0.194]   | 0.08                   | 0.0145 | *  |
| Rate of absolute change (cm <sup>2</sup> /week) † | Unadjusted        | 0.011                                           | [-0.018, 0.041] | 0.01                   | 0.45   |    |
|                                                   | Adjusted¶         | 0.009                                           | [-0.014,0.032]  | 0.01                   | 0.70   |    |
| Rate of relative change (%/week <sup>-1</sup> ) † | Unadjusted        | 5.7                                             | [1.1, 10.3]     | 0.06                   | 0.015  | *  |
|                                                   | Adjusted¶         | 5.7                                             | [1.1,10.3]      | 0.06                   | 0.015  | *  |
| Hazard ratio‡                                     | Unadjusted        | 0.90                                            | [0.74,1.10]     | N/A                    | 0.31   |    |
|                                                   | Adjusted † †      | 0.88                                            | [0.71,1.08]     | N/A                    | 0.21   |    |

† Mixed linear regression, additive change reported ‡ Cox regression, multiplicative change reported

§ Adjusted for baseline value and time since Visit 1. ¶ Adjusted for time since Visit 1 only.

† † Adjusted for baseline ulcer area

FCBG: fasting capillary blood glucose; CI: confidence interval

Table 4 Estimated Pearson correlation coefficients between Diabetic Foot Ulcer Scale-Short Form subscale scores and both log(ulcer area+0.01) and EuroQol 5 Dimension 5 Level

| Correlates<br>DFS-SF subscale | log(ulcer area+0.01)† |                |             | EQ-5D-5L VAS |              |             |
|-------------------------------|-----------------------|----------------|-------------|--------------|--------------|-------------|
|                               | Est.                  | 95% CI         | P           | Est.         | 95% CI       | P           |
| Leisure                       | -0.48                 | [-0.66, -0.25] | <0.0001 *** | 0.50         | [0.23, 0.77] | 0.0002 ***  |
| Physical health               | -0.48                 | [-0.66, -0.26] | <0.0001 *** | 0.64         | [0.44, 0.84] | <0.0001 *** |
| Dependence                    | -0.54                 | [-0.71, -0.33] | <0.0001 *** | 0.58         | [0.36, 0.81] | <0.0001 *** |
| Negative emotion              | -0.64                 | [-0.80, -0.42] | <0.0001 *** | 0.38         | [0.04, 0.72] | 0.03 *      |
| Worried about ulcers          | -0.54                 | [-0.71, -0.32] | <0.0001 *** | 0.62         | [0.38, 0.86] | <0.0001 *** |
| Bothered by ulcer care        | -0.46                 | [-0.63, -0.24] | 0.0001 ***  | 0.36         | [0.04, 0.69] | 0.03 *      |

† Area in cm<sup>2</sup>.  
CI, confidence interval; DFS-SF: Diabetic Foot Ulcer Scale-Short Form; EQ-5D-5L: EuroQol 5 Dimension 5 Level; VAS: visual analogue scale.

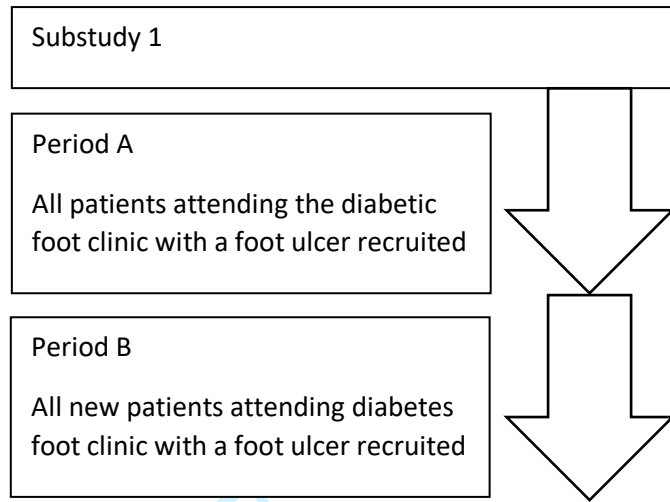



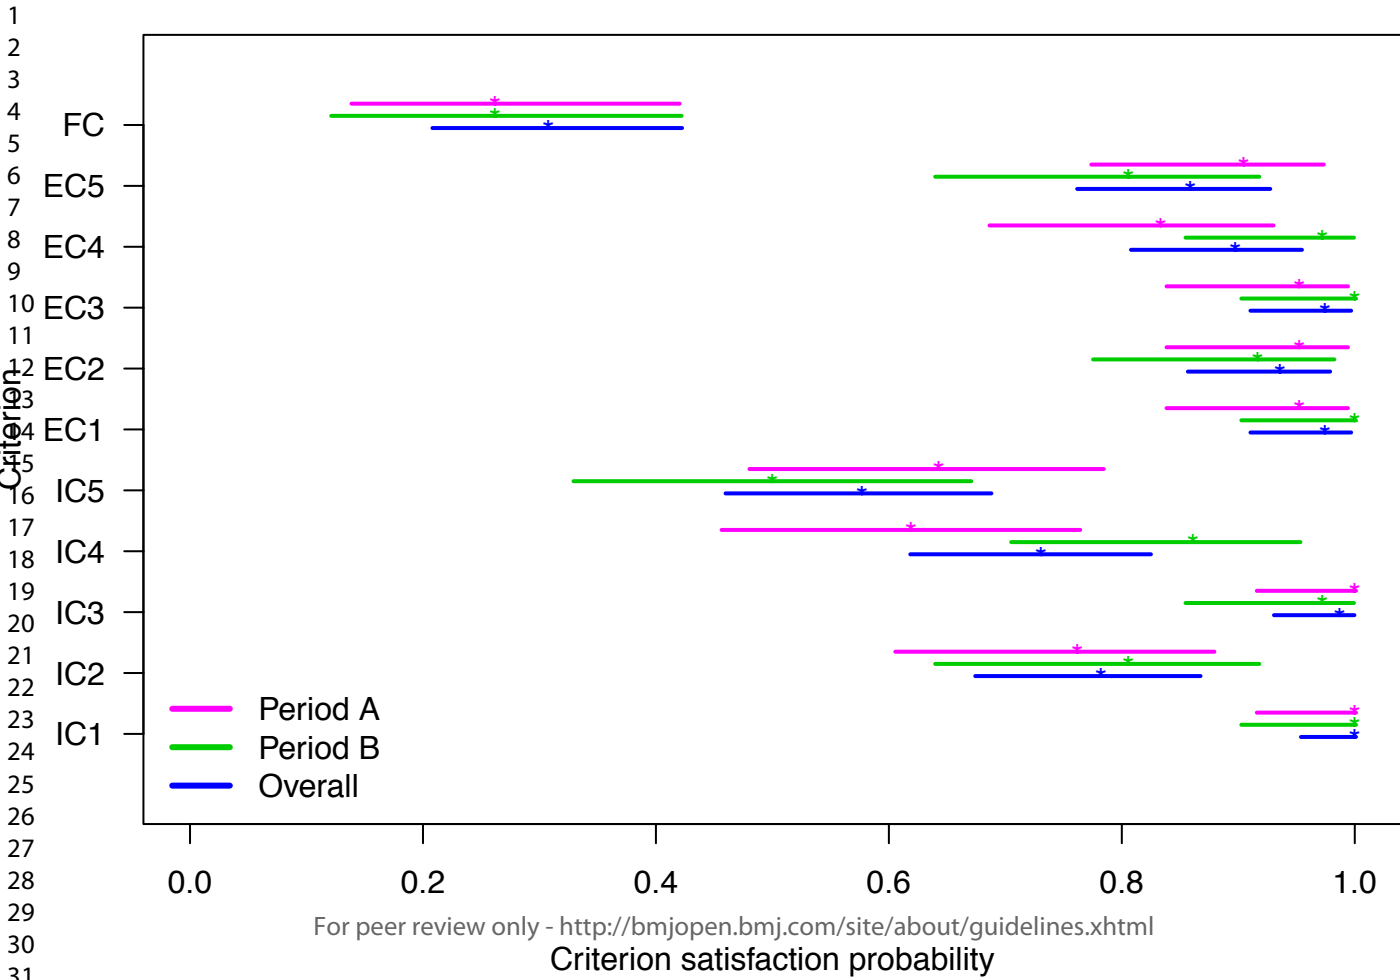

Burden

Efficacy

Symptoms

1  
2  
3  
4  
5  
6  
7  
8  
9  
10  
11  
12  
13  
14  
15  
16  
17  
18  
19  
20  
21  
22  
23  
24  
25

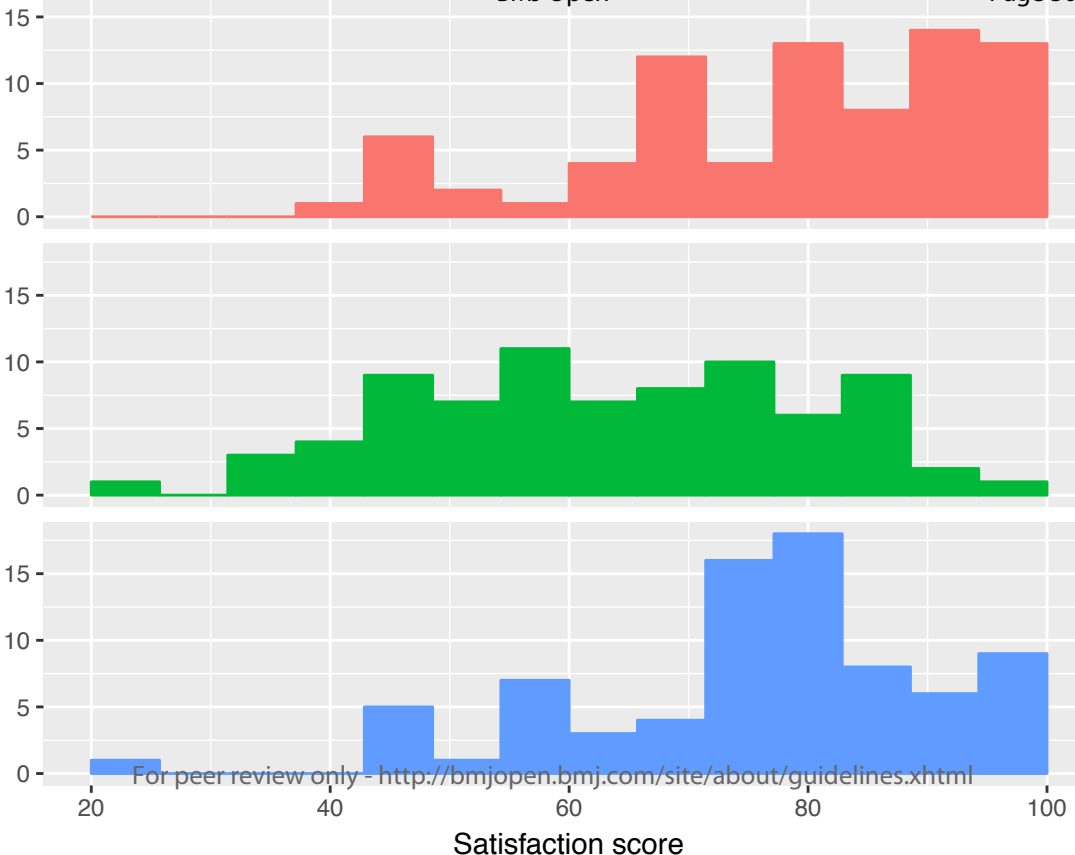

For peer review only - <http://bmjopen.bmj.com/site/about/guidelines.xhtml>

1  
2  
3  
4  
5  
6  
7  
8  
9  
10  
11  
12  
13  
14  
15  
16  
17  
18  
19  
20  
21  
22  
23  
24  
25  
26  
27  
28  
29  
30  
31  
32  
33  
34  
35  
36  
37  
38  
39  
40  
41  
42  
43  
44  
45  
46  
47  
48  
49  
50  
51  
52  
53  
54  
55  
56  
57  
58  
59  
60

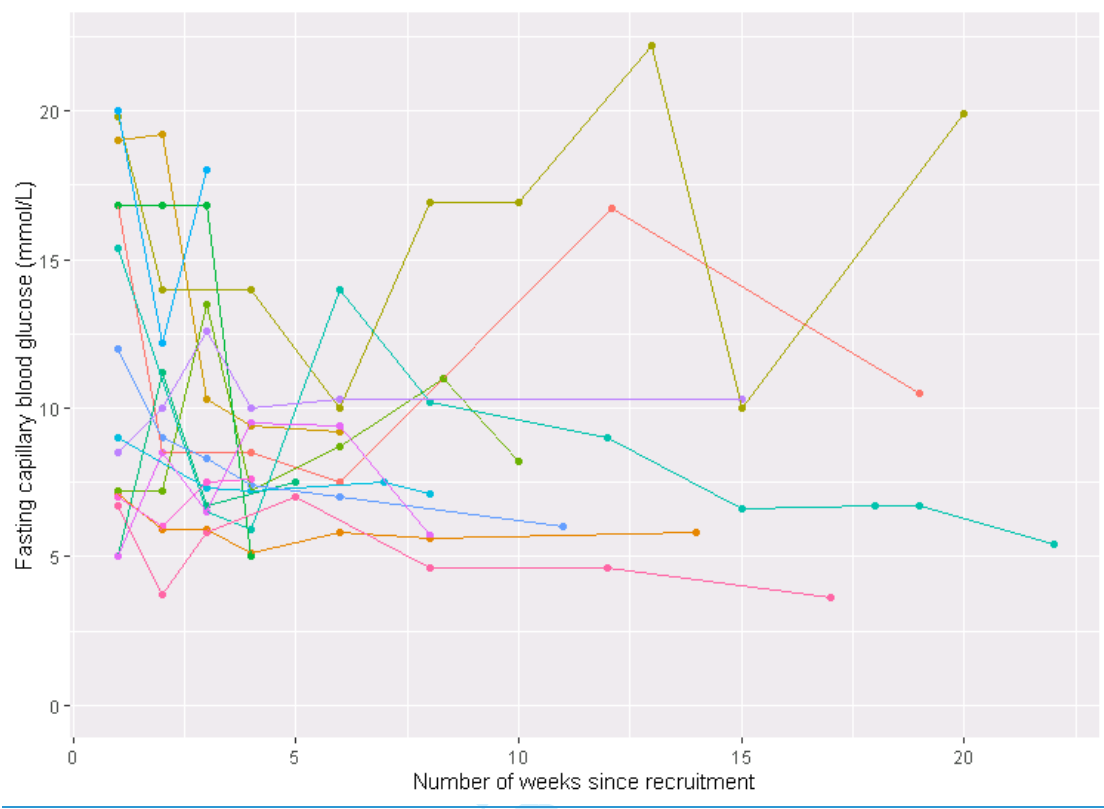

For peer review only

## STROBE Statement—checklist of items that should be included in reports of observational studies

|                    | Item No. | Recommendation                                                                                      | Page No. | Relevant text from manuscript                                                                                                                                                                                                                                                                                                                                                                                                                                                                                                                                                                                                                                                                                                                                                                                                                                                                                                                                                                                                                                                                                                                                                                                                                                                                                                                                                                                                                                                                                                                                                                                                                                                                                  |
|--------------------|----------|-----------------------------------------------------------------------------------------------------|----------|----------------------------------------------------------------------------------------------------------------------------------------------------------------------------------------------------------------------------------------------------------------------------------------------------------------------------------------------------------------------------------------------------------------------------------------------------------------------------------------------------------------------------------------------------------------------------------------------------------------------------------------------------------------------------------------------------------------------------------------------------------------------------------------------------------------------------------------------------------------------------------------------------------------------------------------------------------------------------------------------------------------------------------------------------------------------------------------------------------------------------------------------------------------------------------------------------------------------------------------------------------------------------------------------------------------------------------------------------------------------------------------------------------------------------------------------------------------------------------------------------------------------------------------------------------------------------------------------------------------------------------------------------------------------------------------------------------------|
| Title and abstract | 1        | (a) Indicate the study's design with a commonly used term in the title or the abstract              | Abstract | Two substudies: one cross-sectional, one single-arm prospective                                                                                                                                                                                                                                                                                                                                                                                                                                                                                                                                                                                                                                                                                                                                                                                                                                                                                                                                                                                                                                                                                                                                                                                                                                                                                                                                                                                                                                                                                                                                                                                                                                                |
|                    |          | (b) Provide in the abstract an informative and balanced summary of what was done and what was found | Abstract | <p><i>What was done:</i></p> <p><b>Setting</b> Single-centre secondary care diabetic foot clinic located in New Zealand.</p> <p>Participants Substudy 1: 78 participants consisting of all people <math>\geq 18</math> years with a diabetic foot ulcer presenting to the clinic over 35 weeks in 2015. Substudy 2: 15 participants from Substudy 1 consenting to intensive insulin therapy.</p> <p><b>Intervention</b> None in Substudy 1. Intensive insulin therapy combined with standard podiatry care over 24 weeks.</p> <p><b>Outcome measures</b> Substudy 1: Proportion of participants satisfying potential entry criteria to the RCT. Substudy 2: Glycaemic control (fasting capillary blood sugar; FCBS); time to index ulcer healing; index ulcer size; medication satisfaction (DiabMedSat scores); and health-related quality of life (HrQOL; EQ-5D-5L and DFS-SF scores)..</p> <p><i>What was found:</i></p> <p><b>Results</b> Proportion in Substudy 1 fulfilling all entry criteria was 31% (95% CI 21 to 42). FCBS values declined between baseline and study end (difference -3.7 mmol/L, 95% CI -6.5 to -0.8), suggesting adherence to therapeutic regimen; 83% (95% CI 44 to 95) of ulcers healed by 24 weeks. FCBS correlated negatively, and weakly-to-moderately, with medication satisfaction. Log(ulcer area in <math>\text{cm}^2 + 0.01</math>) was most sensitive to FCBS changes, correlating negatively, and moderately-to-strongly with QOL measures. Detecting a 30% between-group difference in the ulcer area logarithm (80% power, <math>\alpha = 5\%</math>) requires 220 participants per arm, achievable within 1 year with 15 centres similar to the study setting.</p> |

**Introduction**

|                      |   |                                                                                      |   |                                                                                                                                                                                                                                                                                                                                                                                                                                                                                                                                                                                                                                                                                                                                                                                                                                                                                                                                                                                                                                                                                                                                   |
|----------------------|---|--------------------------------------------------------------------------------------|---|-----------------------------------------------------------------------------------------------------------------------------------------------------------------------------------------------------------------------------------------------------------------------------------------------------------------------------------------------------------------------------------------------------------------------------------------------------------------------------------------------------------------------------------------------------------------------------------------------------------------------------------------------------------------------------------------------------------------------------------------------------------------------------------------------------------------------------------------------------------------------------------------------------------------------------------------------------------------------------------------------------------------------------------------------------------------------------------------------------------------------------------|
| Background/rationale | 2 | Explain the scientific background and rationale for the investigation being reported | 5 | [...]clinical practice guidelines from the Society for Vascular Surgery, American Podiatric Medical Association, and Society for Vascular Medicine now recommend adequate glycaemic control (glycosylated haemoglobin [HbA1c] <53 mmol/mol) to reduce the incidence of diabetic foot ulcers 1. The evidence that improved glycaemic control can accelerate the healing of foot ulcers and reduce the incidence of ulceration and amputation remains observational 11-17. There is no randomised trial evidence that tight glycaemic control improves ulcer wound healing 18. A previous feasibility study in this area 19 concluded 15 years ago that a definitive randomised trial in this area was not feasible, possibly due to exacting entry criteria. To investigate further whether a randomised controlled trial (RCT) evaluating the efficacy of intensive insulin therapy on diabetic foot ulcer healing is possible, this two-part feasibility study sought appropriate but less stringent trial entry criteria to improve accrual rates (Substudy 1) and sought appropriate endpoints for such a trial (Substudy 2).. |
|----------------------|---|--------------------------------------------------------------------------------------|---|-----------------------------------------------------------------------------------------------------------------------------------------------------------------------------------------------------------------------------------------------------------------------------------------------------------------------------------------------------------------------------------------------------------------------------------------------------------------------------------------------------------------------------------------------------------------------------------------------------------------------------------------------------------------------------------------------------------------------------------------------------------------------------------------------------------------------------------------------------------------------------------------------------------------------------------------------------------------------------------------------------------------------------------------------------------------------------------------------------------------------------------|

|            |   |                                                                  |   |                                                                                                                                                                                                                                                                                                                                                                                                                                                                                                                                                                                                                                                                                                                                                                                                                                                                                                                                                                                  |
|------------|---|------------------------------------------------------------------|---|----------------------------------------------------------------------------------------------------------------------------------------------------------------------------------------------------------------------------------------------------------------------------------------------------------------------------------------------------------------------------------------------------------------------------------------------------------------------------------------------------------------------------------------------------------------------------------------------------------------------------------------------------------------------------------------------------------------------------------------------------------------------------------------------------------------------------------------------------------------------------------------------------------------------------------------------------------------------------------|
| Objectives | 3 | State specific objectives, including any prespecified hypotheses | 6 | The primary objective of Substudy 1 was to estimate the proportion of participants satisfying the entry criteria for the planned RCT.. [...]Secondary objectives were to estimate the length of the recruitment period for the intended RCT, and determine participant satisfaction with their diabetes medication.<br><br>In Substudy 2, the main objective was to determine a primary endpoint for the RCT by analysing sensitivity of ulcer healing-related outcomes [...]to glycaemic control accounting for standard podiatry care. The ulcer healing outcome measure with the best association with glycaemic control was to be assessed for convergent validity with an established foot ulcer scale. Secondary objectives included examining the relationship between adherence (using glycaemic control as proxy), as well as attendance, and satisfaction with diabetes medication, and evaluating health-related quality of life (HrQOL) measures in this population. |
|------------|---|------------------------------------------------------------------|---|----------------------------------------------------------------------------------------------------------------------------------------------------------------------------------------------------------------------------------------------------------------------------------------------------------------------------------------------------------------------------------------------------------------------------------------------------------------------------------------------------------------------------------------------------------------------------------------------------------------------------------------------------------------------------------------------------------------------------------------------------------------------------------------------------------------------------------------------------------------------------------------------------------------------------------------------------------------------------------|

**Methods**

|              |   |                                                         |     |                                                                                                                                                                                                                                                                                                                                                                                                                                             |
|--------------|---|---------------------------------------------------------|-----|---------------------------------------------------------------------------------------------------------------------------------------------------------------------------------------------------------------------------------------------------------------------------------------------------------------------------------------------------------------------------------------------------------------------------------------------|
| Study design | 4 | Present key elements of study design early in the paper | 7   | <i>First paragraph of Setting and Study Design section:</i><br>Substudy 1 was a cross-sectional study enrolling all people aged ≥18 years with diabetes and a current foot ulcer presenting at the CMH Diabetes Foot Clinic over a period of 24 weeks. Substudy 2 was a single-arm interventional study enrolling Substudy 1 participants meeting all entry criteria (below) and treating them with intensive insulin therapy for 24 weeks. |
| Setting      | 5 | Describe the setting, locations, and relevant           | 7-8 | <i>Setting, location and relevant dates, including periods of recruitment, follow-up:</i>                                                                                                                                                                                                                                                                                                                                                   |

|                     | <p>dates, including periods of recruitment, exposure, follow-up, and data collection</p>                                                                                                                                                                                            |                                                                                                                                                               | <p>The study was conducted at the Counties Manukau Health (CMH) Diabetes Foot Clinic in Auckland, New Zealand between February and October 2015, with Substudy 2 follow-up to February 2016. [...]Substudy 2 was a single-arm interventional study enrolling Substudy 1 participants meeting all entry criteria (below) and treating them with intensive insulin therapy for 24 weeks.</p> <p><i>Data collection:</i></p> <p>Their foot wound(s) (index ulcers) were inspected, and entry criteria status (Table 1) and demographic data recorded. In Substudy 2, visits occurred weekly between weeks 1 (baseline) and 4, then at 6, 8, 12, 16, 20 and 24 weeks, or until the index ulcers healed.</p>                                                                                                                                                                                                                                                                                                                                                                                                                                                                                                                                                                                                                                                                                                                                                                                                                                                                                                                                                                                                                                                                                                                                                                                                                                                                                                                                                          |          |          |             |           |     |                                     |     |                                                                                                                         |     |                                                                |     |                                                                                                                                                               |     |                                                                          |           |     |                                                    |     |                                                                                    |     |                                                                                            |     |                                |     |                                                                                                        |               |    |                                                                                        |
|---------------------|-------------------------------------------------------------------------------------------------------------------------------------------------------------------------------------------------------------------------------------------------------------------------------------|---------------------------------------------------------------------------------------------------------------------------------------------------------------|------------------------------------------------------------------------------------------------------------------------------------------------------------------------------------------------------------------------------------------------------------------------------------------------------------------------------------------------------------------------------------------------------------------------------------------------------------------------------------------------------------------------------------------------------------------------------------------------------------------------------------------------------------------------------------------------------------------------------------------------------------------------------------------------------------------------------------------------------------------------------------------------------------------------------------------------------------------------------------------------------------------------------------------------------------------------------------------------------------------------------------------------------------------------------------------------------------------------------------------------------------------------------------------------------------------------------------------------------------------------------------------------------------------------------------------------------------------------------------------------------------------------------------------------------------------------------------------------------------------------------------------------------------------------------------------------------------------------------------------------------------------------------------------------------------------------------------------------------------------------------------------------------------------------------------------------------------------------------------------------------------------------------------------------------------------|----------|----------|-------------|-----------|-----|-------------------------------------|-----|-------------------------------------------------------------------------------------------------------------------------|-----|----------------------------------------------------------------|-----|---------------------------------------------------------------------------------------------------------------------------------------------------------------|-----|--------------------------------------------------------------------------|-----------|-----|----------------------------------------------------|-----|------------------------------------------------------------------------------------|-----|--------------------------------------------------------------------------------------------|-----|--------------------------------|-----|--------------------------------------------------------------------------------------------------------|---------------|----|----------------------------------------------------------------------------------------|
| <p>Participants</p> | <p>6 (a) <i>Cohort study</i>—Give the eligibility criteria, and the sources and methods of selection of participants. Describe methods of follow-up</p> <p><i>Cross-sectional study</i>—Give the eligibility criteria, and the sources and methods of selection of participants</p> | <p>7 + Table 1</p>                                                                                                                                            | <p><i>Cross-sectional:</i></p> <p>Substudy 1 was a cross-sectional study that enrolled all people aged <math>\geq 18</math> years with diabetes and a current foot ulcer presenting at the CMH Diabetes Foot Clinic over a period of 24 weeks.</p> <p><i>Longitudinal:</i></p> <p>Substudy 2 was a single-arm interventional study that enrolled Substudy 1 participants meeting all entry criteria (Table 1)</p> <p><b>Table 1</b> Entry criteria assessed in Substudy 1 (primary objective)</p> <table border="1"> <thead> <tr> <th>Criteria</th> <th>Notation</th> <th>Description</th> </tr> </thead> <tbody> <tr> <td rowspan="5">Inclusion</td> <td>IC1</td> <td>Male or female aged <math>\geq 18</math> years</td> </tr> <tr> <td>IC2</td> <td>Type 1 or Type 2 diabetes mellitus for more than one year with an HbA<sub>1c</sub> <math>\geq 60</math> mmol/mol (<math>\geq 7.6\%</math>)</td> </tr> <tr> <td>IC3</td> <td>Incident foot ulcer(s) located below the level of the malleoli</td> </tr> <tr> <td>IC4</td> <td>Able and willing to undertake home blood glucose monitoring and administer insulin up to 4 times daily under the supervision of the diabetes nurse specialist</td> </tr> <tr> <td>IC5</td> <td>Able and willing to provide informed consent to participate in the study</td> </tr> <tr> <td rowspan="5">Exclusion</td> <td>EC1</td> <td>Ulcers with radiological features of osteomyelitis</td> </tr> <tr> <td>EC2</td> <td>Significant peripheral vascular disease under consideration for re-vascularisation</td> </tr> <tr> <td>EC3</td> <td>Significant bone deformity as determined by the investigator which may delay wound healing</td> </tr> <tr> <td>EC4</td> <td>Non-adherence to standard care</td> </tr> <tr> <td>EC5</td> <td>Any other disease or condition in the opinion of the investigator could make them unsuitable for entry</td> </tr> <tr> <td>Full Criteria</td> <td>FC</td> <td>All inclusion criterion satisfied (5-Yes) and all exclusion criterion satisfied (5-No)</td> </tr> </tbody> </table> | Criteria | Notation | Description | Inclusion | IC1 | Male or female aged $\geq 18$ years | IC2 | Type 1 or Type 2 diabetes mellitus for more than one year with an HbA <sub>1c</sub> $\geq 60$ mmol/mol ( $\geq 7.6\%$ ) | IC3 | Incident foot ulcer(s) located below the level of the malleoli | IC4 | Able and willing to undertake home blood glucose monitoring and administer insulin up to 4 times daily under the supervision of the diabetes nurse specialist | IC5 | Able and willing to provide informed consent to participate in the study | Exclusion | EC1 | Ulcers with radiological features of osteomyelitis | EC2 | Significant peripheral vascular disease under consideration for re-vascularisation | EC3 | Significant bone deformity as determined by the investigator which may delay wound healing | EC4 | Non-adherence to standard care | EC5 | Any other disease or condition in the opinion of the investigator could make them unsuitable for entry | Full Criteria | FC | All inclusion criterion satisfied (5-Yes) and all exclusion criterion satisfied (5-No) |
| Criteria            | Notation                                                                                                                                                                                                                                                                            | Description                                                                                                                                                   |                                                                                                                                                                                                                                                                                                                                                                                                                                                                                                                                                                                                                                                                                                                                                                                                                                                                                                                                                                                                                                                                                                                                                                                                                                                                                                                                                                                                                                                                                                                                                                                                                                                                                                                                                                                                                                                                                                                                                                                                                                                                  |          |          |             |           |     |                                     |     |                                                                                                                         |     |                                                                |     |                                                                                                                                                               |     |                                                                          |           |     |                                                    |     |                                                                                    |     |                                                                                            |     |                                |     |                                                                                                        |               |    |                                                                                        |
| Inclusion           | IC1                                                                                                                                                                                                                                                                                 | Male or female aged $\geq 18$ years                                                                                                                           |                                                                                                                                                                                                                                                                                                                                                                                                                                                                                                                                                                                                                                                                                                                                                                                                                                                                                                                                                                                                                                                                                                                                                                                                                                                                                                                                                                                                                                                                                                                                                                                                                                                                                                                                                                                                                                                                                                                                                                                                                                                                  |          |          |             |           |     |                                     |     |                                                                                                                         |     |                                                                |     |                                                                                                                                                               |     |                                                                          |           |     |                                                    |     |                                                                                    |     |                                                                                            |     |                                |     |                                                                                                        |               |    |                                                                                        |
|                     | IC2                                                                                                                                                                                                                                                                                 | Type 1 or Type 2 diabetes mellitus for more than one year with an HbA <sub>1c</sub> $\geq 60$ mmol/mol ( $\geq 7.6\%$ )                                       |                                                                                                                                                                                                                                                                                                                                                                                                                                                                                                                                                                                                                                                                                                                                                                                                                                                                                                                                                                                                                                                                                                                                                                                                                                                                                                                                                                                                                                                                                                                                                                                                                                                                                                                                                                                                                                                                                                                                                                                                                                                                  |          |          |             |           |     |                                     |     |                                                                                                                         |     |                                                                |     |                                                                                                                                                               |     |                                                                          |           |     |                                                    |     |                                                                                    |     |                                                                                            |     |                                |     |                                                                                                        |               |    |                                                                                        |
|                     | IC3                                                                                                                                                                                                                                                                                 | Incident foot ulcer(s) located below the level of the malleoli                                                                                                |                                                                                                                                                                                                                                                                                                                                                                                                                                                                                                                                                                                                                                                                                                                                                                                                                                                                                                                                                                                                                                                                                                                                                                                                                                                                                                                                                                                                                                                                                                                                                                                                                                                                                                                                                                                                                                                                                                                                                                                                                                                                  |          |          |             |           |     |                                     |     |                                                                                                                         |     |                                                                |     |                                                                                                                                                               |     |                                                                          |           |     |                                                    |     |                                                                                    |     |                                                                                            |     |                                |     |                                                                                                        |               |    |                                                                                        |
|                     | IC4                                                                                                                                                                                                                                                                                 | Able and willing to undertake home blood glucose monitoring and administer insulin up to 4 times daily under the supervision of the diabetes nurse specialist |                                                                                                                                                                                                                                                                                                                                                                                                                                                                                                                                                                                                                                                                                                                                                                                                                                                                                                                                                                                                                                                                                                                                                                                                                                                                                                                                                                                                                                                                                                                                                                                                                                                                                                                                                                                                                                                                                                                                                                                                                                                                  |          |          |             |           |     |                                     |     |                                                                                                                         |     |                                                                |     |                                                                                                                                                               |     |                                                                          |           |     |                                                    |     |                                                                                    |     |                                                                                            |     |                                |     |                                                                                                        |               |    |                                                                                        |
|                     | IC5                                                                                                                                                                                                                                                                                 | Able and willing to provide informed consent to participate in the study                                                                                      |                                                                                                                                                                                                                                                                                                                                                                                                                                                                                                                                                                                                                                                                                                                                                                                                                                                                                                                                                                                                                                                                                                                                                                                                                                                                                                                                                                                                                                                                                                                                                                                                                                                                                                                                                                                                                                                                                                                                                                                                                                                                  |          |          |             |           |     |                                     |     |                                                                                                                         |     |                                                                |     |                                                                                                                                                               |     |                                                                          |           |     |                                                    |     |                                                                                    |     |                                                                                            |     |                                |     |                                                                                                        |               |    |                                                                                        |
| Exclusion           | EC1                                                                                                                                                                                                                                                                                 | Ulcers with radiological features of osteomyelitis                                                                                                            |                                                                                                                                                                                                                                                                                                                                                                                                                                                                                                                                                                                                                                                                                                                                                                                                                                                                                                                                                                                                                                                                                                                                                                                                                                                                                                                                                                                                                                                                                                                                                                                                                                                                                                                                                                                                                                                                                                                                                                                                                                                                  |          |          |             |           |     |                                     |     |                                                                                                                         |     |                                                                |     |                                                                                                                                                               |     |                                                                          |           |     |                                                    |     |                                                                                    |     |                                                                                            |     |                                |     |                                                                                                        |               |    |                                                                                        |
|                     | EC2                                                                                                                                                                                                                                                                                 | Significant peripheral vascular disease under consideration for re-vascularisation                                                                            |                                                                                                                                                                                                                                                                                                                                                                                                                                                                                                                                                                                                                                                                                                                                                                                                                                                                                                                                                                                                                                                                                                                                                                                                                                                                                                                                                                                                                                                                                                                                                                                                                                                                                                                                                                                                                                                                                                                                                                                                                                                                  |          |          |             |           |     |                                     |     |                                                                                                                         |     |                                                                |     |                                                                                                                                                               |     |                                                                          |           |     |                                                    |     |                                                                                    |     |                                                                                            |     |                                |     |                                                                                                        |               |    |                                                                                        |
|                     | EC3                                                                                                                                                                                                                                                                                 | Significant bone deformity as determined by the investigator which may delay wound healing                                                                    |                                                                                                                                                                                                                                                                                                                                                                                                                                                                                                                                                                                                                                                                                                                                                                                                                                                                                                                                                                                                                                                                                                                                                                                                                                                                                                                                                                                                                                                                                                                                                                                                                                                                                                                                                                                                                                                                                                                                                                                                                                                                  |          |          |             |           |     |                                     |     |                                                                                                                         |     |                                                                |     |                                                                                                                                                               |     |                                                                          |           |     |                                                    |     |                                                                                    |     |                                                                                            |     |                                |     |                                                                                                        |               |    |                                                                                        |
|                     | EC4                                                                                                                                                                                                                                                                                 | Non-adherence to standard care                                                                                                                                |                                                                                                                                                                                                                                                                                                                                                                                                                                                                                                                                                                                                                                                                                                                                                                                                                                                                                                                                                                                                                                                                                                                                                                                                                                                                                                                                                                                                                                                                                                                                                                                                                                                                                                                                                                                                                                                                                                                                                                                                                                                                  |          |          |             |           |     |                                     |     |                                                                                                                         |     |                                                                |     |                                                                                                                                                               |     |                                                                          |           |     |                                                    |     |                                                                                    |     |                                                                                            |     |                                |     |                                                                                                        |               |    |                                                                                        |
|                     | EC5                                                                                                                                                                                                                                                                                 | Any other disease or condition in the opinion of the investigator could make them unsuitable for entry                                                        |                                                                                                                                                                                                                                                                                                                                                                                                                                                                                                                                                                                                                                                                                                                                                                                                                                                                                                                                                                                                                                                                                                                                                                                                                                                                                                                                                                                                                                                                                                                                                                                                                                                                                                                                                                                                                                                                                                                                                                                                                                                                  |          |          |             |           |     |                                     |     |                                                                                                                         |     |                                                                |     |                                                                                                                                                               |     |                                                                          |           |     |                                                    |     |                                                                                    |     |                                                                                            |     |                                |     |                                                                                                        |               |    |                                                                                        |
| Full Criteria       | FC                                                                                                                                                                                                                                                                                  | All inclusion criterion satisfied (5-Yes) and all exclusion criterion satisfied (5-No)                                                                        |                                                                                                                                                                                                                                                                                                                                                                                                                                                                                                                                                                                                                                                                                                                                                                                                                                                                                                                                                                                                                                                                                                                                                                                                                                                                                                                                                                                                                                                                                                                                                                                                                                                                                                                                                                                                                                                                                                                                                                                                                                                                  |          |          |             |           |     |                                     |     |                                                                                                                         |     |                                                                |     |                                                                                                                                                               |     |                                                                          |           |     |                                                    |     |                                                                                    |     |                                                                                            |     |                                |     |                                                                                                        |               |    |                                                                                        |

---

EC, exclusion criteria; HbA<sub>1c</sub>, glycosylated haemoglobin; IC, inclusion criteria.

---

(b) *Cohort study*—For matched studies, give matching criteria and number of exposed and unexposed

*Case-control study*—For matched studies, give matching criteria and the number of controls per case

---

|                              |    |                                                                                                                                                                                      |    |                                                                                                                                                                                                                                                                                                                                                                                                                                                                                                                                                                                                                                                                                                                                                                                                                                                                                                                                                               |
|------------------------------|----|--------------------------------------------------------------------------------------------------------------------------------------------------------------------------------------|----|---------------------------------------------------------------------------------------------------------------------------------------------------------------------------------------------------------------------------------------------------------------------------------------------------------------------------------------------------------------------------------------------------------------------------------------------------------------------------------------------------------------------------------------------------------------------------------------------------------------------------------------------------------------------------------------------------------------------------------------------------------------------------------------------------------------------------------------------------------------------------------------------------------------------------------------------------------------|
| Variables                    | 7  | Clearly define all outcomes, exposures, predictors, potential confounders, and effect modifiers. Give diagnostic criteria, if applicable                                             | 8  | <p><b>Study procedures and outcomes</b></p> <p>Substudy 1 participants completed a Diabetes Medication Satisfaction (DiabMedSat) questionnaire. Their foot wound(s) (index ulcers) were inspected, and entry criteria status (Table 1) and demographic data recorded. In Substudy 2, [...] [t]he following were undertaken at each visit: ulcer examination: digital photographic planimetry of ulcer area (using the SilhouetteStar camera, ARANZ Medical, New Zealand); FCBS measurement (in mmol/L); medication review; and adverse events assessment. FCBS was used in the analyses as a measure of glycaemic control and as a proxy for adherence. HbA1c was assessed at baseline and at the end of trial, providing an assessment of chronic hyperglycaemia. [...]. In addition, participants completed three questionnaires at each visit: DiabMedSat, EuroQol 5 Dimensions 5 Levels (EQ-5D-5L) and Diabetic Foot Ulcer Scale-Short Form (DFS-SF).</p> |
| Data sources/<br>measurement | 8* | For each variable of interest, give sources of data and details of methods of assessment (measurement). Describe comparability of assessment methods if there is more than one group |    | <p><i>See 7 above. No comparator group is used in this feasibility study.</i></p>                                                                                                                                                                                                                                                                                                                                                                                                                                                                                                                                                                                                                                                                                                                                                                                                                                                                             |
| Bias                         | 9  | Describe any efforts to address potential sources of bias                                                                                                                            | 9  | <p><i>Substudy 1 – bias due to differential initial and later recruitment:</i></p> <p>A Poisson exact test was used to compare recruitment rates over two recruitment periods and mixed logistic regression used to compare differences in entry criteria fulfilment between the periods.</p> <p><i>Substudy 2 – bias due to confounding by time::</i></p> <p>Linear mixed models were used to determine the relationship between four different ulcer area-related outcomes at each visit [...] and glycaemic control. (The value of 0.01 in the logarithmic endpoint was chosen on the basis of the data to improve the normality of the outcome.) [...]. Time- and/or baseline ulcer area-adjusted estimates, as well as unadjusted estimates, were produced to assess potential confounding, as tight management in a foot clinic may promote ulcer healing in several ways.</p>                                                                          |
|                              |    |                                                                                                                                                                                      | 10 | <p><i>Substudy 2 – bias due to missingness:</i></p>                                                                                                                                                                                                                                                                                                                                                                                                                                                                                                                                                                                                                                                                                                                                                                                                                                                                                                           |



[The non-survival] analyses all involved mixed models on longitudinal data, known to alleviate selection bias due to missingness.

*The relevant sources of bias for the main study (for which this is a feasibility study) is bias due to loss to follow-up or missingness. Accordingly, we have attempted to briefly characterise participant attendance:*

Descriptive statistics were produced on completed follow-ups (defined as healing before 24 weeks or attending the 24-week visit) and attended visits. Attendance probability was regressed on the most recently available FCBS, measure of ulcer area and DiabMedSat subscores using mixed logistic regression.

|            |    |                                           |   |                                                                                                                                                                                                                                                                                                                                                                                                                                                                                                                                                                 |
|------------|----|-------------------------------------------|---|-----------------------------------------------------------------------------------------------------------------------------------------------------------------------------------------------------------------------------------------------------------------------------------------------------------------------------------------------------------------------------------------------------------------------------------------------------------------------------------------------------------------------------------------------------------------|
| Study size | 10 | Explain how the study size was arrived at | 7 | <p><b>Accrual period and sample size</b></p> <p>The accrual period for Substudy 1 (35 weeks) was selected as long as possible while respecting contractual obligations with the study funder.[...]</p> <p>Substudy 2 aimed to recruit 20 participants. Assuming 10% attrition, this number is sufficient to estimate the standard deviation of a continuous variable (e.g. ulcer area) with a coefficient of variation inferior to 0.2. This criterion is consistent with the goal of identifying a sensitive primary endpoint endowed with good precision.</p> |
|------------|----|-------------------------------------------|---|-----------------------------------------------------------------------------------------------------------------------------------------------------------------------------------------------------------------------------------------------------------------------------------------------------------------------------------------------------------------------------------------------------------------------------------------------------------------------------------------------------------------------------------------------------------------|

|                        |    |                                                                                                                              |      |                                                                                                                                                                                                                                                                                                                                                                                                                                                                                                                                                                                                                                                                                                                                                                                                                                                                                                                                                                                                                                                       |
|------------------------|----|------------------------------------------------------------------------------------------------------------------------------|------|-------------------------------------------------------------------------------------------------------------------------------------------------------------------------------------------------------------------------------------------------------------------------------------------------------------------------------------------------------------------------------------------------------------------------------------------------------------------------------------------------------------------------------------------------------------------------------------------------------------------------------------------------------------------------------------------------------------------------------------------------------------------------------------------------------------------------------------------------------------------------------------------------------------------------------------------------------------------------------------------------------------------------------------------------------|
| Quantitative variables | 11 | Explain how quantitative variables were handled in the analyses. If applicable, describe which groupings were chosen and why | 9-10 | <p><i>Substudy 1:</i></p> <p>Descriptive statistics were produced for [...] DiabMedSat subscores. Multivariate analysis of variance (MANOVA) was used to detect differences in subscores based on demographic or participant characteristics. [...] [M]ixed logistic regression [was] used to compare differences in entry criteria fulfilment between the periods. Indicators of criterion satisfaction were fitted jointly by themselves in a first model, and interacting with period in a second model.</p> <p><i>Substudy 2:</i></p> <p>[...]</p> <p>Linear mixed models were used to determine the relationship between four different ulcer area-related outcomes at each visit (ulcer area in cm<sup>2</sup>, log[ulcer area+0.01], absolute and relative rates of change in ulcer area, where “log” is the natural logarithm function) and glycaemic control. (The value of 0.01 in the logarithmic endpoint was chosen based on the data to improve the normality of the outcome.) FCBS was the fixed effect and participant the random</p> |
|------------------------|----|------------------------------------------------------------------------------------------------------------------------------|------|-------------------------------------------------------------------------------------------------------------------------------------------------------------------------------------------------------------------------------------------------------------------------------------------------------------------------------------------------------------------------------------------------------------------------------------------------------------------------------------------------------------------------------------------------------------------------------------------------------------------------------------------------------------------------------------------------------------------------------------------------------------------------------------------------------------------------------------------------------------------------------------------------------------------------------------------------------------------------------------------------------------------------------------------------------|

effect. [...]The most sensitive outcome was selected by consideration of its time-adjusted observed significance level and its equivalent Cohen's effect size where appropriate. To estimate correlations and their 95% confidence intervals (CI) using longitudinal data, we fitted outcomes jointly using a heterogeneous compound symmetry covariance model, and using only intercepts as fixed effects. We thus obtained correlations between DFS-SF subscores and selected ulcer healing outcome; between DiabMedSat subscores and FCBS; and between DFS-SF subscores and EQ-5D-5L. (*And before any non-statistical reviewer vociferates that this makes no sense, they should talk to a statistician.*)

Descriptive statistics were produced on completed follow-ups (defined as healing before 24 weeks or attending the 24-week visit) and attended visits. Attendance probability was regressed on the most recently available FCBS, measure of ulcer area and DiabMedSat subscores using mixed logistic regression. The final attendance model was selected using AIC.

|    |             |    |                     |   |                                                                                                                           |
|----|-------------|----|---------------------|---|---------------------------------------------------------------------------------------------------------------------------|
| 16 | Statistical | 12 | (a) Describe all    | 9 | <i>See 11 above, to which we add:</i>                                                                                     |
| 17 | methods     |    | statistical         |   | <i>Substudy 1:</i>                                                                                                        |
| 18 |             |    | methods,            |   | Descriptive statistics were produced for participant demographic characteristics, recruitment rate, entry criteria        |
| 19 |             |    | including those     |   | fulfilment [...].                                                                                                         |
| 20 |             |    | used to control for |   | A Poisson exact test was used to compare recruitment rates over two recruitment periods [...].                            |
| 21 |             |    | confounding         |   |                                                                                                                           |
| 22 |             |    |                     |   | <i>Substudy 2:</i>                                                                                                        |
| 23 |             |    |                     |   | Time-to-healing was considered as a fifth possible outcome, and Cox regression used to estimate the hazard ratio of       |
| 24 |             |    |                     |   | ulcer healing under changes in FCBS, taken as a time-dependent covariate.                                                 |
| 25 |             |    |                     |   |                                                                                                                           |
| 26 |             |    |                     |   | <i>Substudy 2 – in regard to confounding:</i>                                                                             |
| 27 |             |    |                     |   | Time- and/or baseline ulcer area-adjusted estimates, as well as unadjusted estimates, were produced to assess             |
| 28 |             |    |                     |   | potential confounding, as tight management in a foot clinic may promote ulcer healing in several ways.                    |
| 29 |             |    |                     |   |                                                                                                                           |
| 30 |             |    | (b) Describe any    | 9 | <i>Applies to Substudy 1 only:</i>                                                                                        |
| 31 |             |    | methods used to     |   | [...] [M]ixed logistic regression [was] used to compare differences in entry criteria fulfilment between the periods.     |
| 32 |             |    | examine             |   | Indicators of criterion satisfaction were fitted jointly by themselves in a first model, and interacting with period in a |
| 33 |             |    | subgroups and       |   | second model. Models were compared using a deviance test.                                                                 |
| 34 |             |    | interactions        |   |                                                                                                                           |
| 35 |             |    |                     |   |                                                                                                                           |
| 36 |             |    |                     |   |                                                                                                                           |
| 37 |             |    |                     |   |                                                                                                                           |
| 38 |             |    |                     |   |                                                                                                                           |

|  |                                                                                                                                                                                             |    |                                                                                                                                                                                                                                                                                                                                                                                                                                                                                                                                                                                                                                                                                                                                                                                                                                                                                                                                                                                                                                                                                                                                                                                            |
|--|---------------------------------------------------------------------------------------------------------------------------------------------------------------------------------------------|----|--------------------------------------------------------------------------------------------------------------------------------------------------------------------------------------------------------------------------------------------------------------------------------------------------------------------------------------------------------------------------------------------------------------------------------------------------------------------------------------------------------------------------------------------------------------------------------------------------------------------------------------------------------------------------------------------------------------------------------------------------------------------------------------------------------------------------------------------------------------------------------------------------------------------------------------------------------------------------------------------------------------------------------------------------------------------------------------------------------------------------------------------------------------------------------------------|
|  | (c) Explain how missing data were addressed                                                                                                                                                 | 10 | <i>(Note: No missing data in Substudy 1).</i><br><br>No data were missing for time-to-healing analyses. Other analyses all involved mixed models on longitudinal data, known to alleviate selection bias due to missingness                                                                                                                                                                                                                                                                                                                                                                                                                                                                                                                                                                                                                                                                                                                                                                                                                                                                                                                                                                |
|  | (d) Cohort study—If applicable, explain how loss to follow-up was addressed<br><i>Cross-sectional study</i> —If applicable, describe analytical methods taking account of sampling strategy | 10 | <i>Cross-sectional Substudy 1: not applicable</i><br><br><i>Longitudinal Substudy 2:</i><br>Descriptive statistics were produced on completed follow-ups (defined as healing before 24 weeks or attending the 24-week visit) and attended visits. Attendance probability was regressed on the most recently available FCBS, measure of ulcer area and DiabMedSat subscores using mixed logistic regression. The final attendance model was selected using AIC.<br><br>See also 12 (c).                                                                                                                                                                                                                                                                                                                                                                                                                                                                                                                                                                                                                                                                                                     |
|  | (e) Describe any sensitivity analyses                                                                                                                                                       | 10 | <i>Arguably, our main analysis for Substudy 2 is a sensitivity analysis:</i><br>Linear mixed models were used to determine the relationship between four different ulcer area-related outcomes at each visit (ulcer area in cm <sup>2</sup> , log[ulcer area+0.01], absolute and relative rates of change in ulcer area) and glycaemic control. (The value of 0.01 in the logarithmic endpoint was chosen based on the data to improve the normality of the outcome.) FCBS was the fixed effect and participant the random effect. Time-to-healing was considered as a fifth possible outcome. A Kaplan-Meier estimate of ulcer persistence probability was produced and Cox regression used to estimate the hazard ratio of ulcer healing under changes in FCBS, taken as a time-dependent covariate. Time- and/or baseline ulcer area-adjusted estimates, as well as unadjusted estimates, were produced to assess potential confounding, as tight management in a foot clinic may promote ulcer healing in several ways. The most sensitive outcome was selected by consideration of its adjusted observed significance level and its equivalent Cohen's effect size where appropriate. |

## Results

|              |     |                       |    |                                                                                                                                          |
|--------------|-----|-----------------------|----|------------------------------------------------------------------------------------------------------------------------------------------|
| Participants | 13* | (a) Report numbers of | 10 | <i>Substudy 1:</i><br>Seventy-eight participants (all unique clinic visitors during the recruitment period) were enrolled in Substudy 1. |
|--------------|-----|-----------------------|----|------------------------------------------------------------------------------------------------------------------------------------------|

|                  |     |                                                                                                                                                                             |    |                                                                                                                                                                                                                                                                                                                                                                                                                                                                                                                                                                                                                                                                                                                                          |
|------------------|-----|-----------------------------------------------------------------------------------------------------------------------------------------------------------------------------|----|------------------------------------------------------------------------------------------------------------------------------------------------------------------------------------------------------------------------------------------------------------------------------------------------------------------------------------------------------------------------------------------------------------------------------------------------------------------------------------------------------------------------------------------------------------------------------------------------------------------------------------------------------------------------------------------------------------------------------------------|
|                  |     | individuals at each stage of study—eg numbers potentially eligible, examined for eligibility, confirmed eligible, included in the study, completing follow-up, and analysed |    | <p><i>Substudy 2:</i><br/>(page 8): Substudy 2 was a single-arm interventional study that enrolled Substudy 1 participants meeting all entry criteria [...].<br/>(page 11): Seventy-eight participants (all unique clinic visitors during the recruitment period) were enrolled in Substudy 1 [...].<br/>(page 12 – this is apparently out of order because it is a feasibility result):. Twenty-four participants (30.8% [95% CI 20.8, 42.2]) met all criteria.<br/>(page 12): Seventeen participants entered Substudy 2. One withdrew consent after Visit 1 and another was healed on Visit 1, leaving 15 participants in the analysis set.<br/>(page 12): Two participants with unhealed ulcers did not attend the 24-week visit.</p> |
|                  |     | (b) Give reasons for non-participation at each stage                                                                                                                        | 11 | <p><i>Substudy 2:</i><br/>One withdrew consent after Visit 1 and another was healed on Visit 1, leaving 15 participants in the analysis set.</p>                                                                                                                                                                                                                                                                                                                                                                                                                                                                                                                                                                                         |
|                  |     | (c) Consider use of a flow diagram                                                                                                                                          |    | <i>The flow appears to us to be simple enough not to warrant a diagram.</i>                                                                                                                                                                                                                                                                                                                                                                                                                                                                                                                                                                                                                                                              |
| Descriptive data | 14* | (a) Give characteristics of study participants (eg demographic, clinical, social) and information on exposures and potential confounders                                    | 7  | <p><i>Substudy 1 (see also Table 1):</i><br/>Mean age was 57.3 years (SD 14.0). The majority were men and most were of Pacific or European ethnicity. (Table 2).<br/><br/><i>Substudy 2 – see Table 2</i></p>                                                                                                                                                                                                                                                                                                                                                                                                                                                                                                                            |
|                  |     | (b) Indicate number of participants with missing data for                                                                                                                   | 11 | <p><i>Substudy 2:</i><br/>Clinical constraints or patient choice prevented some measurements from being taken, yielding completeness proportions for specific outcomes between 78% (DMS and FCBS) and 85% (ulcer area).</p>                                                                                                                                                                                                                                                                                                                                                                                                                                                                                                              |

1  
2  
3  
4  
5  
6  
7  
8  
9  
10  
11  
12  
13  
14  
15  
16  
17  
18  
19  
20  
21  
22  
23  
24  
25  
26  
27  
28  
29  
30  
31  
32  
33  
34  
35  
36  
37  
38  
39  
40  
41  
42  
43  
44  
45  
46

|              |                   |                                                                                              |    |                                                                                                                                                                                                                                                                                                                                                                                                                                                                                              |
|--------------|-------------------|----------------------------------------------------------------------------------------------|----|----------------------------------------------------------------------------------------------------------------------------------------------------------------------------------------------------------------------------------------------------------------------------------------------------------------------------------------------------------------------------------------------------------------------------------------------------------------------------------------------|
|              |                   | each variable of interest                                                                    |    |                                                                                                                                                                                                                                                                                                                                                                                                                                                                                              |
|              | (c) Cohort study— | Summarise follow-up time (eg, average and total amount)                                      | 11 | Substudy 2:<br><b>Completeness</b><br>Of the 102 scheduled visits, 12 were missed [...].The average follow-up time to healing or last visit was 17.6 weeks (SD 7.8).                                                                                                                                                                                                                                                                                                                         |
| Outcome data | 15*               | Cohort study—<br>Report numbers of outcome events or summary measures over time              | 12 | Substudy 2:<br>Twelve Substudy 2 participants experienced complete healing between weeks 3 and 24; the remaining three had unhealed ulcers at the time of their last visit on or before week 24. Median ulcer healing time was 7 weeks. The Kaplan-Meier estimate of the proportion of ulcers not healing by week 24 was 16.7% (95% CI 5.0–56.1%).<br><i>Table 4 for summary correlations</i>                                                                                                |
|              |                   | Case-control study—Report numbers in each exposure category, or summary measures of exposure |    |                                                                                                                                                                                                                                                                                                                                                                                                                                                                                              |
|              |                   | Cross-sectional study—Report numbers of outcome events or summary measures                   | 8  | Substudy 1:<br><b>Recruitment rate and entry criteria</b><br>Period A (as defined earlier) finished after 6 weeks, and was the most active with 42 participants recruited compared with 36 participants over the remaining 29 weeks, forming Period B.<br>All participants satisfied criterion IC1, 78.2% met IC2, 98.7% met IC3, 73.1% met IC4 and 57.7% met IC5.Twenty-four participants (30.8% [95% CI 20.8, 42.2]) met all criteria.<br>[...]<br><b>Diabetes Medication Satisfaction</b> |

Higher scores on the DiabMedSat subscales indicate increased satisfaction for all three subscales. The subscale histograms are displayed in Figure 2. Median score for the Efficacy subscale was 63.3 (interquartile range [IQR] 26.7), and was numerically lower than those of the Burden (81.8 [IQR 22.8]) and Symptom subscales (80.0 [IQR 16.0]).

Main results

16

(a) Give unadjusted estimates and, if applicable, confounder-adjusted estimates and their precision (eg, 95% confidence interval). Make clear which confounders were adjusted for and why they were included

Table 3

**Table 1 Unadjusted and adjusted regression results for five ulcer-healing endpoints against fasting capillary blood sugar**

| Ulcer outcome                                     | Adjustment status | Change in outcome per 1 mmol/L increase in FCBS |                 | Equivalent effect size | P      |    |
|---------------------------------------------------|-------------------|-------------------------------------------------|-----------------|------------------------|--------|----|
|                                                   |                   | Estimate                                        | 95% CI          |                        |        |    |
| Ulcer area (cm <sup>2</sup> ) †                   | Unadjusted        | 0.010                                           | [-0.041,0.062]  | 0.004                  | 0.69   |    |
|                                                   | Adjusted§         | 0.004                                           | [-0.024,0.032]  | 0.001                  | 0.77   |    |
| Log(ulcer area+0.01) †                            | Unadjusted        | 0.134                                           | [0.049,0.214]   | 0.10                   | 0.002  | ** |
|                                                   | Adjusted§         | 0.114                                           | [0.020,0.194]   | 0.08                   | 0.0145 | *  |
| Rate of absolute change (cm <sup>2</sup> /week) † | Unadjusted        | 0.011                                           | [-0.018, 0.041] | 0.01                   | 0.45   |    |
|                                                   | Adjusted¶         | 0.011                                           | [-0.019,0.041]  | 0.01                   | 0.69   |    |
| Rate of relative change (%/week <sup>-1</sup> ) † | Unadjusted        | 5.7                                             | [1.1, 10.3]     | 0.06                   | 0.015  | *  |
|                                                   | Adjusted¶         | 5.7                                             | [1.1,10.3]      | 0.06                   | 0.015  | *  |
| Hazard ratio‡                                     | Unadjusted        | 0.90                                            | [0.74,1.10]     | N/A                    | 0.31   |    |
|                                                   | Adjusted † †      | 0.88                                            | [0.71,1.08]     | N/A                    | 0.21   |    |

† Mixed linear regression, additive change reported ‡ Cox regression, multiplicative change reported

§ Adjusted for baseline value and time since Visit 1. ¶ Adjusted for time since Visit 1 only.

† † Adjusted for baseline ulcer area

FCBS: fasting capillary blood sugar; CI: confidence interval

(b) Report category boundaries when continuous variables were categorized

*Not applicable.*

1  
2  
3  
4  
5  
6  
7  
8  
9  
10  
11  
12  
13  
14  
15  
16  
17  
18  
19  
20  
21  
22  
23  
24  
25  
26  
27  
28  
29  
30  
31  
32  
33  
34  
35  
36  
37  
38  
39  
40  
41  
42  
43  
44  
45  
46

|                   |    |                                                                                                                  |    |                                                                                                                                                                                                                                                                                                                                                                                                                                                                                                                                                                            |
|-------------------|----|------------------------------------------------------------------------------------------------------------------|----|----------------------------------------------------------------------------------------------------------------------------------------------------------------------------------------------------------------------------------------------------------------------------------------------------------------------------------------------------------------------------------------------------------------------------------------------------------------------------------------------------------------------------------------------------------------------------|
|                   |    | (c) If relevant, consider translating estimates of relative risk into absolute risk for a meaningful time period | 11 | <i>Substudy 1:</i><br>The A-to-B rate ratio of eligibility to a full study, however, was 4.1 (95% CI 1.8-9.2). The eligibility rate in period B was 0.45 participant per week (95% CI 0.24-0.77).                                                                                                                                                                                                                                                                                                                                                                          |
| Other analyses    | 17 | Report other analyses done—eg analyses of subgroups and interactions, and sensitivity analyses                   |    | <i>Not applicable.</i>                                                                                                                                                                                                                                                                                                                                                                                                                                                                                                                                                     |
| <b>Discussion</b> |    |                                                                                                                  |    |                                                                                                                                                                                                                                                                                                                                                                                                                                                                                                                                                                            |
| Key results       | 18 | Summarise key results with reference to study objectives                                                         | 10 | This feasibility study showed that by using less stringent entry criteria, more people with diabetic foot ulcers attending our foot clinic (30%) may be eligible for a proposed RCT investigating the efficacy of an intensive insulin regimen on diabetic foot ulcer healing than reported in a previous feasibility study (0.5% [1/200]) 19. The study also showed that the primary endpoint of log(ulcer area+0.01), with ulcer area measured using digital photographic planimetry, may be sensitive enough to glycaemic control to base an RCT on in this population. |
| Limitations       | 19 | Discuss limitations of the study, taking into account sources of potential bias or imprecision.                  | 11 | <i>(No biasing issue was identified, but see 21.)</i><br>Some limitations temper the interpretation of our results. Firstly, Substudy 2 did not reach the target sample size of 20. This shortfall was largely due to availability of personnel and funder timelines. These issues, particularly around staffing, have the potential to affect any future RCT. Moreover, the study was conducted at a single centre in New Zealand, limiting generalisability to other populations and settings with different care pathways for diabetes and diabetic complications.      |

|                          |    |                                                                                                                                                                            |    |                                                                                                                                                                                                                                                                                                                                                                                                                  |
|--------------------------|----|----------------------------------------------------------------------------------------------------------------------------------------------------------------------------|----|------------------------------------------------------------------------------------------------------------------------------------------------------------------------------------------------------------------------------------------------------------------------------------------------------------------------------------------------------------------------------------------------------------------|
|                          |    | Discuss both direction and magnitude of any potential bias                                                                                                                 |    |                                                                                                                                                                                                                                                                                                                                                                                                                  |
| Interpretation           | 20 | Give a cautious overall interpretation of results considering objectives, limitations, multiplicity of analyses, results from similar studies, and other relevant evidence | 16 | The study has produced evidence of moderate quality that tight glycaemic control may be beneficial for ulcer healing, and that an outcome derived from ulcer area could be sensitive to glycaemic control as expressed by FCBS. However, we have also demonstrated that a reasonably powered trial would require the involvement of a large number of centres, increasing the complexity of such an undertaking. |
| Generalisability         | 21 | Discuss the generalisability (external validity) of the study results                                                                                                      | 16 | [...] [T]he study was conducted at a single centre in New Zealand, limiting generalisability to other populations and settings with different care pathways for diabetes and diabetic complications.                                                                                                                                                                                                             |
| <b>Other information</b> |    |                                                                                                                                                                            |    |                                                                                                                                                                                                                                                                                                                                                                                                                  |
| Funding                  | 22 | Give the source of funding and the role of the funders for the present study and, if                                                                                       | 17 | <b>Funding</b> This work was supported by the Health Research Council of New Zealand's Feasibility Study grant number 14/605.                                                                                                                                                                                                                                                                                    |



1  
2  
3  
4  
5  
6  
7  
8  
9  
10  
11  
12  
13  
14  
15  
16  
17  
18  
19  
20  
21  
22  
23  
24  
25  
26  
27  
28  
29  
30  
31  
32  
33  
34  
35  
36  
37  
38  
39  
40  
41  
42  
43  
44  
45  
46

---

applicable, for  
the original  
study on which  
the present  
article is based

---

\*Give information separately for cases and controls in case-control studies and, if applicable, for exposed and unexposed groups in cohort and cross-sectional studies.

**Note:** An Explanation and Elaboration article discusses each checklist item and gives methodological background and published examples of transparent reporting. The STROBE checklist is best used in conjunction with this article (freely available on the Web sites of PLoS Medicine at <http://www.plosmedicine.org/>, Annals of Internal Medicine at <http://www.annals.org/>, and Epidemiology at <http://www.epidem.com/>). Information on the STROBE Initiative is available at [www.strobe-statement.org](http://www.strobe-statement.org).

# BMJ Open

## Does intensive glycaemic control promote healing in diabetic foot ulcers? A feasibility study

|                                 |                                                                                                                                                                                                                                                                                                                                                                                                                                                                                                                                           |
|---------------------------------|-------------------------------------------------------------------------------------------------------------------------------------------------------------------------------------------------------------------------------------------------------------------------------------------------------------------------------------------------------------------------------------------------------------------------------------------------------------------------------------------------------------------------------------------|
| Journal:                        | <i>BMJ Open</i>                                                                                                                                                                                                                                                                                                                                                                                                                                                                                                                           |
| Manuscript ID                   | bmjopen-2019-029009.R2                                                                                                                                                                                                                                                                                                                                                                                                                                                                                                                    |
| Article Type:                   | Original research                                                                                                                                                                                                                                                                                                                                                                                                                                                                                                                         |
| Date Submitted by the Author:   | 11-Dec-2019                                                                                                                                                                                                                                                                                                                                                                                                                                                                                                                               |
| Complete List of Authors:       | Dissanayake, Ajith; Counties Manukau Health, Endocrinology<br>Vandal, Alain; Auckland University of Technology, Faculty of Health and Environmental Sciences; Counties Manukau Health, Ko Awatea<br>Boyle, Veronica; Counties Manukau District Health Board, Diabetes and Endocrinology<br>Park, Diane; Auckland University of Technology, Faculty of Health and Environmental Sciences<br>Milne, Bobbie; Middlemore Clinical Trials<br>Grech, Roger; Counties Manukau Health, Podiatry<br>Ng, Anthony; Counties Manukau Health, Podiatry |
| <b>Primary Subject Heading</b>: | Diabetes and endocrinology                                                                                                                                                                                                                                                                                                                                                                                                                                                                                                                |
| Secondary Subject Heading:      | Research methods                                                                                                                                                                                                                                                                                                                                                                                                                                                                                                                          |
| Keywords:                       | Diabetic foot < DIABETES & ENDOCRINOLOGY, WOUND MANAGEMENT, STATISTICS & RESEARCH METHODS                                                                                                                                                                                                                                                                                                                                                                                                                                                 |
|                                 |                                                                                                                                                                                                                                                                                                                                                                                                                                                                                                                                           |

SCHOLARONE™  
Manuscripts

**TITLE**

Does intensive glycaemic control promote healing in diabetic foot ulcers? A feasibility study

**AUTHOR DETAILS**

Ajith Dissanayake\*

Consultant endocrinologist, Counties Manukau District Health Board

Alain C. Vandal\*

Associate Professor, Department of Statistics, The University of Auckland

Veronica Boyle

Endocrinology Registrar, Counties Manukau District Health Board

Diane Park

Research Assistant, Faculty of Health and Environmental Sciences

Auckland University of Technology

Bobbie Milne

Research Nurse, Middlemore Clinical Trials

Roger Grech

Podiatrist, Counties Manukau District Health Board

Anthony Ng

Podiatrist, Counties Manukau District Health Board

\* A. Dissanayake and A.C. Vandal should be considered joint lead authors

**CORRESPONDING AUTHOR**

Associate Professor Alain C. Vandal

PO Box 93311

Research and Evaluation Office, Ko Awatea, Counties Manukau Health,  
Otahuhu, Auckland, New Zealand.

Tel: +64 9 921 9999 ext 7726

Email: [alain.vandal@auckland.ac.nz](mailto:alain.vandal@auckland.ac.nz)

**WORD COUNT**

333 (Abstract)

3152 (Main text)

**ABBREVIATED TITLE**

Glycaemic control for diabetic foot ulcers

## ABSTRACT

**Introduction** One in four diabetes patients will develop a foot ulcer over their lifetime. The role of glycaemic control in the healing of foot ulcers in diabetes patients is not supported by randomised controlled trial (RCT) data.

**Objectives:** To determine the feasibility of an RCT of glycaemic control with intensive insulin therapy in diabetic foot ulcer, by assessing: entry criteria; fasting capillary blood glucose (FCBG) medication satisfaction; sensitivity of different ulcer-healing endpoints to glycaemic control.

**Design** Two substudies: one cross-sectional, one single-arm prospective.

**Setting** Single-centre secondary care diabetic foot clinic in New Zealand.

**Participants** Substudy 1: 78 participants consisting of all people  $\geq 18$  years with a diabetic foot ulcer presenting to the clinic over 35 weeks in 2015. Substudy 2: 15 participants from Substudy 1 consenting to intensive insulin therapy.

**Intervention** Substudy 1: none. Substudy 2: Intensive insulin therapy with standard podiatry care over 24 weeks.

**Outcome** Substudy 1: Proportion of participants satisfying potential RCT entry criteria; medication satisfaction (DiabMedSat). Substudy 2: Fasting capillary blood glucose (FCBG); index ulcer healing time; index ulcer size; health-related quality of life (HRQoL; EQ-5D-5L and DFS-SF).

**Results** Proportion in Substudy 1 satisfying all entry criteria was 31% (95% CI 21 to 42). FCBG values decreased between baseline and study end (difference -3.7 mmol/L, 95% CI -6.5 to -0.8); 83% (95% CI 44 to 95) of ulcers healed by 24 weeks. FCBG correlated negatively with medication satisfaction. Ulcer area logarithm was most sensitive to FCBG changes, displaying significant negative correlation with HRQoL outcomes. Detecting a 30% between-group difference in this outcome (80%

1  
2  
3 power,  $\alpha=5\%$ ) requires 220 participants per arm, achievable within 1 year with 15  
4  
5 centres similar to study setting.  
6

7  
8 **Conclusions** An adequately powered RCT requires co-operation between a large  
9  
10 number of centres. Ulcer area logarithm should be primary endpoint.  
11

12 **Trial registration** ANZCTR ACTRN12617001414303  
13  
14

## 15 16 17 **Strengths and limitations of this study** 18

- 19  
20 • First study in 15 years to examine the feasibility of a definitive randomised  
21  
22 controlled trial (RCT) of intensive insulin therapy for diabetic foot ulcers.  
23
- 24 • Use of imaging techniques allowed assessment of various ulcer-size-related  
25  
26 outcomes as potential primary endpoints for an RCT.  
27
- 28 • The target sample size of 20 for Substudy 2, examining the relationship  
29  
30 between ulcer healing and glycaemic control, was not achieved during the  
31  
32 study period.  
33
- 34 • The study was conducted in a single centre in New Zealand, limiting  
35  
36 generalisability to other populations and settings with different pathways for  
37  
38 diabetes and diabetic complications.  
39  
40  
41  
42  
43  
44

## 45 **KEYWORDS**

46  
47 Diabetic Foot  
48 Blood Glucose  
49 Wound Healing  
50 Outcome Assessment (Health Care)  
51 Sample Size  
52  
53  
54  
55  
56  
57  
58  
59  
60

## Introduction

One in four diabetes patients will develop a foot ulcer in their lifetime [1]. Diabetic foot ulcer is one of the most significant complications of diabetes [1–4] and often responds poorly to treatment, with only one-third of those managed in secondary care healing by 3 months and one-half at 6 months [5]. Non-healing ulcers are an important cause of lower extremity amputation. Most notable causes of foot ulceration are peripheral neuropathy, peripheral vascular disease and structural foot disease [6,7]. These factors are linked to hyperglycaemia [8–10] and pathological states associated with diabetes.

A meta-analysis of nine randomised controlled trials in nearly 11,000 participants showed that intensive glycaemic control potentially improved the incidence of diabetic foot ulcer, decreased the risk of amputation and improved sensory nerve function compared with less intensive control [11]. As a result, clinical practice guidelines from the Society for Vascular Surgery, American Podiatric Medical Association, and Society for Vascular Medicine now recommend adequate glycaemic control (glycosylated haemoglobin [HbA1c] <53 mmol/mol) to reduce the incidence of diabetic foot ulcers [1].

The evidence that improved glycaemic control can accelerate the healing of foot ulcers and reduce the incidence of ulceration and amputation remains observational [12–18]. There is no randomised trial evidence that tight glycaemic control improves ulcer wound healing [11]. A previous feasibility study in this area concluded 15 years ago that a definitive randomised trial in this area [19] was not feasible, possibly due to exacting entry criteria. To investigate further whether a randomised controlled trial (RCT) evaluating the efficacy of intensive insulin therapy on diabetic foot ulcer healing is possible, this two-part feasibility study sought appropriate but less

1  
2  
3 stringent trial entry criteria to improve accrual rates (Substudy 1) and sought  
4 appropriate endpoints for such a trial (Substudy 2). In Substudy 2, presence or  
5 absence of peripheral neuropathy, peripheral vascular disease and foot deformities  
6 were noted as they were identified factors in the genesis of diabetic foot ulcers. Data  
7 on microcirculation in the feet were also collected using novel laser imaging  
8 technology. This report focuses on data from Substudy 1 and Substudy 2; the laser  
9 imaging data analysis will be reported separately.

10  
11  
12  
13  
14  
15  
16  
17  
18  
19 The primary objective of Substudy 1 was to estimate the proportion of participants  
20 satisfying the entry criteria for the planned RCT. Entry criteria used in the previous  
21 feasibility study [19] were revised as follows: removing the requirement for chronic  
22 ulcers (>4 weeks); removing the ulcer size criterion (25-2500 mm<sup>2</sup>), and including  
23 participants with a higher HbA1c ( $\geq 60$  mmol/mol), renal disease and/or a history of  
24 hypoglycaemia. Secondary objectives were to estimate the length of the recruitment  
25 period for the intended RCT, and determine participant satisfaction with their  
26 diabetes medication.

27  
28  
29  
30  
31  
32  
33  
34  
35  
36  
37  
38 In Substudy 2, the main objective was to determine a primary endpoint for the RCT  
39 by analysing sensitivity of ulcer healing-related outcomes (ulcer area, change in  
40 ulcer area, and time to complete healing) to glycaemic control accounting for  
41 standard podiatry care. The ulcer healing outcome measure with the best  
42 association with glycaemic control was to be assessed for convergent validity with an  
43 established foot ulcer scale. Secondary objectives included examining the  
44 relationship between improved glycaemic control as well as attendance, and  
45 satisfaction with diabetes medication, and evaluating health-related quality of life  
46 (HrQOL) measures in this population.



## Materials and methods

### Setting and Study Design

The study was conducted at the Counties Manukau Health (CMH) Diabetes Foot Clinic in Auckland, New Zealand between 2 February and 28 September 2015, with Substudy 2 follow-up to 20 February 2016. Substudy 1 was a cross-sectional study enrolling all people aged  $\geq 18$  years with diabetes and a current foot ulcer presenting at the CMH Diabetes Foot Clinic over a period of 24 weeks. Substudy 2 was a single-arm interventional study enrolling Substudy 1 participants meeting all entry criteria (Table 1) and treating them with intensive insulin therapy for 24 weeks. The protocol was approved by the New Zealand Northern A Health and Disability Ethics Committee (ref: 14/NTA/195). All participants provided informed written consent.

### Accrual periods and sample size

The accrual period for Substudy 1 (35 weeks) was selected as long as possible while respecting contractual obligations with the study funder. To distinguish between recruitment of existing patients and new patients, we prospectively defined two recruitment periods. During the first period of recruitment (Period A) all patients attending the diabetic foot clinic were to be recruited. Period A was to finish from the moment patients already attending the clinic were recruited, at which point only newly enrolled clinic patients started to be recruited in the study, giving way to Period B (Figure 1).

<< Figure 1 approximately here. >>

Substudy 2 aimed to recruit 20 participants. Assuming 10% attrition, this number is sufficient to estimate the standard deviation of a continuous variable (e.g. ulcer area)

1  
2  
3 with a coefficient of variation inferior to 0.2. This criterion is consistent with the goal  
4  
5 of identifying a sensitive primary endpoint endowed with good precision.  
6  
7

8 <<Table 1 approximately here>>  
9

## 10 **Patient and Public Involvement**

11  
12 Patients' priorities, experience and preferences were taken into account through the  
13  
14 clinical experience of the study team, who devised the research question associated  
15  
16 with the intended full study. The participants were not involved in the design of this  
17  
18 study; however, one of the objectives of the feasibility study was to obtain feedback  
19  
20 from participants that would inform the design of a potential larger study. Patients  
21  
22 were not involved in the recruitment or conduct of the study. The participants will be  
23  
24 provided access to the research paper. The results of the study will be displayed in  
25  
26 the podiatry clinic where the participants attend.  
27  
28  
29  
30  
31

## 32 **Study procedures and outcomes**

33  
34 Substudy 1 participants completed a Diabetes Medication Satisfaction (DiabMedSat)  
35  
36 questionnaire [20,21]. Their foot wound(s) (index ulcers) were inspected, and entry  
37  
38 criteria status (Table 1) and demographic data recorded. In Substudy 2, visits  
39  
40 occurred weekly between weeks 1 (baseline) and 4, then at 6, 8, 12, 16, 20 and 24  
41  
42 weeks, or until the index ulcers healed. The following were undertaken at each visit:  
43  
44 ulcer examination: digital photographic planimetry of ulcer area (using the  
45  
46 SilhouetteStar camera, ARANZ Medical, New Zealand); FCBG measurement (in  
47  
48 mmol/L); medication review; and adverse events assessment. FCBG was used in  
49  
50 the analyses as a measure of glycaemic control [22] HbA1c was assessed at  
51  
52 baseline and at the end of trial, providing an assessment of chronic hyperglycaemia.  
53  
54 By contrast, fasting capillary glucose or mean daily capillary glucose may provide  
55  
56 evidence of acute improvement of glycaemia in a short-term clinical trial[22]. In  
57  
58  
59  
60

1  
2  
3 addition, participants completed three questionnaires at each visit: DiabMedSat  
4 [20,21], EuroQol 5 Dimensions 5 Levels (EQ-5D-5L) [23,24] and Diabetic Foot Ulcer  
5 Scale-Short Form (DFS-SF) [25].  
6  
7  
8  
9

## 10 **Intervention**

11  
12  
13 On entry to Substudy 2, intermediate- or long-acting insulin was initiated or adjusted,  
14 and given in addition to usual oral hypoglycaemic tablet therapy (first line metformin,  
15 second line sulphonylurea). In addition participants received cholesterol lowering  
16 medication, anti-hypertensives and aspirin to prevent cardiovascular disease  
17 consistent with international guidelines [26]. Short-acting mealtime insulin was  
18 provided as appropriate. The goal was to maintain FCBG at 4–7 mmol/L, with  $\leq 2$   
19 episodes of mild hypoglycaemia per week. If  $> 2$  episodes of mild hypoglycaemia  
20 occurred the target FCBG was raised. Within these parameters the choice of  
21 regimen was determined by the Diabetes Nurse Specialist.  
22  
23  
24  
25  
26  
27  
28  
29  
30  
31  
32

33  
34 Substudy 2 participants received usual podiatry care at each visit, including ulcer  
35 debridement, orthotics prescription and adjustments, antibiotics if indicated and  
36 education.  
37  
38  
39  
40

## 41 **Statistical analyses**

### 42 *Substudy 1*

43  
44  
45 Descriptive statistics were produced for participant demographic characteristics,  
46 recruitment rate, entry criteria fulfilment and DiabMedSat subscores. Multivariate  
47 analysis of variance (MANOVA) was used to detect differences in subscores based  
48 on demographic or participant characteristics. A Poisson exact test was used to  
49 compare recruitment rates over two recruitment periods and mixed logistic  
50 regression used to compare differences in entry criteria fulfilment between the  
51 periods. Indicators of criterion satisfaction were fitted jointly by themselves in a first  
52  
53  
54  
55  
56  
57  
58  
59  
60

1  
2  
3 model, and interacting with period in a second model. Models were compared using  
4  
5 deviance tests.  
6

### 7 *Substudy 2*

8  
9  
10 The analysis set for this feasibility study consisted of all participants having initiated  
11  
12 treatment. All analyses were carried out on the index ulcers, present at the first visit.  
13  
14 All participants had a single index ulcer.

15  
16  
17 Linear mixed models were used to determine the relationship between four different  
18  
19 ulcer area-related outcomes at each visit (ulcer area in cm<sup>2</sup>, log[ulcer area+0.01],  
20  
21 absolute and relative rates of change in ulcer area) and glycaemic control. (The  
22  
23 value of 0.01 in the logarithmic endpoint has been previously validated as a  
24  
25 surrogate marker of ulcer healing [27] was chosen based on the data to improve the  
26  
27 normality of the outcome.) FCBG was the fixed effect and participant the random  
28  
29 effect. Time-to-healing was considered as a fifth possible outcome. A Kaplan-Meier  
30  
31 estimate of ulcer persistence probability was produced and Cox regression used to  
32  
33 estimate the hazard ratio of ulcer healing under changes in FCBG, taken as a time-  
34  
35 dependent covariate. Time- and/or baseline ulcer area-adjusted estimates, as well  
36  
37 as unadjusted estimates, were produced to assess potential confounding, as tight  
38  
39 management in a foot clinic may promote ulcer healing in several ways. The most  
40  
41 sensitive outcome was selected by consideration of its adjusted observed  
42  
43 significance level and its equivalent Cohen's effect size where appropriate. To  
44  
45 estimate correlations and their 95% confidence intervals (CI) using all available  
46  
47 longitudinal data, we fitted outcomes jointly using a heterogeneous compound  
48  
49 symmetry covariance model, and using only intercepts as fixed effects. We thus  
50  
51 obtained correlations between DFS-SF subscores and selected ulcer healing  
52  
53  
54  
55  
56  
57  
58  
59  
60

1  
2  
3 outcome; between DiabMedSat subscores and FCBG; and between DFS-SF  
4  
5 subscores and EQ-5D-5L.  
6

7  
8 Descriptive statistics were produced on completed follow-ups (defined as healing  
9  
10 before 24 weeks or attending the 24-week visit) and attended visits. Attendance  
11  
12 probability was regressed on the most recently available FCBG, measure of ulcer  
13  
14 area and DiabMedSat subscores using mixed logistic regression. The final  
15  
16 attendance model was selected using AIC.  
17

18  
19 No data were missing for time-to-healing analyses. Other analyses all involved  
20  
21 mixed models on longitudinal data, known to alleviate selection bias due to  
22  
23 missingness [28].  
24  
25

## 26 27 **Results**

### 28 29 **Participants**

30  
31  
32 <<Table 2 approximately here.>>  
33

34 Seventy-eight participants (all unique clinic visitors during the recruitment period)  
35  
36 were enrolled in Substudy 1 (Table 2). Mean age was 57 years (SD 14). The majority  
37  
38 were men and most were of Pacific or European ethnicity. No data were missing for  
39  
40 Substudy 1. All participants were identified as having some measure of foot  
41  
42 deformity, judged unlikely to affect ulcer healing by the treating podiatrists. However,  
43  
44 no objective measure of foot deformity, to our knowledge, has been assessed for  
45  
46 association with ulcer healing.  
47  
48

49  
50 Seventeen participants entered Substudy 2. One withdrew consent after Visit 1 and  
51  
52 another was healed on Visit 1, leaving 15 participants in the analysis set, assessed  
53  
54 on a total of 90 occasions.  
55  
56  
57  
58  
59  
60

## Completeness

Two participants with unhealed ulcers did not attend the 24-week visit (13%, 95% CI 2 to 40). Of the 102 scheduled visits, 12 were missed, yielding an attendance proportion of 91% (95% CI 79 to 96), accounting for clustering by participant. Average follow-up time to healing or last visit was 17.6 weeks (SD 7.8). Clinical constraints or patient choice prevented some measurements from being taken, yielding completeness proportions for specific outcomes between 78% (DiabMedSat and FCBG) and 85% (ulcer area).

## Recruitment rate and entry criteria

Period A (as defined earlier) finished after 6 weeks, and was the most active with 42 participants recruited compared with 36 participants over the remaining 29 weeks, forming Period B.

All participants satisfied criterion IC1, 78.2% met IC2, 98.7% met IC3, 73.1% met IC4 and 57.7% met IC5. Twenty-four participants (30.8%, 95% CI 20.8 to 42.2) met all criteria. Removal of any single criteria increased eligibility proportion appreciably only in the case of IC2 (to 37.2%, 95% CI 26.5 to 48.9) and IC5 (to 38.5%, 95% CI 27.7 to 50.2). The probabilities of participants meeting entry criteria differed between periods A and B (Figure 2); the criterion-period interaction term was significant ( $P=0.009$ ). The A-to-B rate ratio of eligibility to a full study was 4.1 (95% CI 1.8 to 9.2). The eligibility rate in period B was 0.45 participant per week (95% CI 0.24 to 0.77).

<<Figure 2 approximately here.>>

## Diabetes Medication Satisfaction

Higher scores on the DiabMedSat subscales indicate increased satisfaction for all three subscales. The subscale histograms are displayed in Figure 3. Median score

1  
2  
3 for the Efficacy subscale was 63.3 (interquartile range [IQR] 26.7), and was  
4 numerically lower than those of the Burden (81.8 [IQR 22.8]) and Symptom  
5 subscales (80.0 [IQR 16.0]). MANOVA demonstrated no significant variation in  
6 subscale scores based on ethnicity, sex or diabetes duration, but there was  
7 significant variation in the Burden ( $P = 0.005$ ) and Symptom ( $P=0.026$ ) scores based  
8 on age (generally higher in older participants).  
9

10  
11  
12 <<Figure 3 approximately here.>>  
13  
14

### 15 16 17 **Glycaemic control**

18  
19  
20 FCBG values during the study indicated that participants were generally adhering to  
21 their glycaemic control regimen. Between study end and baseline, the mean  
22 difference in FCBG was -3.7 mmol/L (95% CI -6.5 to -0.8) and in HbA1c was -9.4  
23 mmol/mol (95% CI -19.0 to 0.3). The fasting blood glucose of participants of  
24 Substudy 2 over time are shown in Figure 4.  
25  
26  
27  
28  
29  
30  
31  
32

33  
34 << Figure 4 approximately here. >>  
35  
36

### 37 38 **Selection of primary endpoint for RCT**

39  
40 <<Table 3 approximately here.>>  
41

42  
43 Twelve Substudy 2 participants experienced complete healing between weeks 3 and  
44 24; the remaining three had unhealed ulcers at the time of their last visit on or before  
45 week 24. Median ulcer-healing time was 7 weeks. The Kaplan-Meier estimate of the  
46 proportion of ulcers not healing by week 24 was 16.7% (95% CI 5.0 to 56.1). The Cox  
47 model showed no significant association between time to ulcer healing and FCBG  
48 (Table 3).  
49  
50  
51  
52

53  
54  
55 Log(ulcer area in  $\text{cm}^2+0.01$ ) (hereafter “log of ulcer area”) and ulcer area relative rate  
56 of change were the only ulcer healing outcomes sensitive to change in FCBG (Table  
57 3). The former was selected as most sensitive to changes in FCBG, with effect size  
58  
59  
60

1  
2  
3 of 0.08 per mmol/L increase in FCBG, adjusted for both time and baseline value.  
4  
5 This corresponds to a 30% reduction in ulcer area with a 3mmol/L improvement in  
6  
7 FCBG. Time adjustment was intended to account for non-glycaemia-related  
8  
9 improvements and interventions such as podiatric care. Between- and within-  
10  
11 participant outcome variances were estimated at 1.3 and 0.4 respectively.  
12  
13

### 14 15 **Validation of selected outcome with QOL measures**

16  
17 <<Table 4 approximately here.>>  
18

19  
20 DFS-SF scores tended to increase over time (i.e. improved HrQOL); increases  
21  
22 reached statistical significance for four of the six subscales (Leisure [ $P=0.05$ ],  
23  
24 Dependence [ $P=0.01$ ], Negative emotion [ $P=0.001$ ] and Worried about ulcers  
25  
26 [ $P=0.04$ ]). All six subscales showed statistically significant, moderate-to-strong  
27  
28 negative correlation with log of ulcer area (Table 4).  
29  
30

### 31 32 **Participant satisfaction and improvement of fasting capillary blood glucose**

33  
34 Glycaemia levels displayed weak to moderate negative correlation with the  
35  
36 DiabMedSat scores. The correlation of FCBG with the Burden subscale was -0.35  
37  
38 (95% CI -0.59 to -0.09;  $P=0.01$ ), with the Efficacy subscale -0.42 (95% CI -0.61 to  
39  
40 -0.18;  $P=0.0009$ ) and with the Symptoms subscale -0.21 (95% CI -0.47 to 0.08,  
41  
42  $P=0.15$ ).  
43  
44

### 45 46 **Health-related QOL**

47  
48 The EQ-5D-5L VAS displayed moderate to strong positive correlation with all six  
49  
50 DFS-SF subscale scores (Table 4).  
51  
52  
53  
54  
55  
56  
57  
58  
59  
60



## Modelling of attendance

The model explaining attendance with smallest AIC involved the DiabMedSat Burden score only, with an attendance odds ratio of 1.78 (95% CI 1.26 to 2.51;  $P=0.001$ ) per 10-point score increase.

## Discussion

### Key findings

This feasibility study showed that by using less stringent entry criteria, more people with diabetic foot ulcers attending our foot clinic (30%) may be eligible for a proposed RCT investigating the efficacy of an intensive insulin regimen on diabetic foot ulcer healing than reported in a previous feasibility study (0.5% [1/200]) [19]. The study also showed that the primary endpoint of log of ulcer area, with ulcer area measured using digital photographic planimetry, may be sensitive enough to glycaemic control to base an RCT on in this population.

The mean HbA1c of substudy group 2 prior to the intervention was 93 mmol/mol and the mean FCBG was 11.3 mmol/L. Depending on the model used to estimate HbA1c from FCBG there may appear to be a discrepancy. However, this is explained by the small number of participants, and the variability of contribution between FCBG and post-prandial capillary blood glucose between individuals especially at higher HbA1c concentrations [22].

In terms of design and conduct of an RCT of intensive glycaemic control versus standard care in people with diabetic foot ulcers, analysis showed that the largest gains in eligibility from removal of a single criterion would occur by waiving IC2 (type 1 or type 2 diabetes for greater than one year with an HbA1c of >60mmol/mol) or IC5. IC5 cannot of course be waived, since participant consent is compulsory in any ethical clinical trial. However, if glycaemic control is efficacious in individuals with

1  
2  
3 recently developed diabetes, IC2 could perhaps advantageously be relaxed. Those  
4 with recent onset diabetes maybe different to those with long standing diabetes in  
5 ways that impact upon ulcer healing. On the other hand, those with recently  
6 diagnosed diabetes will likely have years of exposure to risk factors they share with  
7 those with long standing diabetes that predispose them to ulcer formation also [29].  
8 Further findings are indications that acting on the medication burden may improve  
9 attendance and that acting on medication satisfaction in general, and satisfaction  
10 with efficacy in particular, may improve adherence to the control regimen. In both  
11 cases, however, the evidence obtained is only correlational and not causal.  
12  
13  
14  
15  
16  
17  
18  
19  
20  
21  
22

### 23 **Relationship to other studies**

24  
25  
26  
27 Ulcer healing data suggested an early beneficial effect of intensive insulin therapy;  
28 median healing time was 7 weeks after the initial visit, and by week 21 an estimated  
29 17% of ulcers had not healed. Over a similar timeframe, much lower healing rates  
30 have been reported with standard care (e.g. 31% at 20 weeks in a meta-analysis  
31 [30]). Even when standard care included insulin, a retrospective cohort study found  
32 that only 30% of ulcers had healed after 1.1 month [31]. The baseline mean HbA1c  
33 was lower in the participants of that study (7.9% or 63mmol/mol) compared to our  
34 own (10.8% or 94mmol/mol). While this finding is promising, a randomised controlled  
35 trial is needed to confirm that this is the effect of intensive blood glucose control.  
36  
37  
38  
39  
40  
41  
42  
43  
44  
45  
46  
47  
48  
49  
50  
51  
52  
53  
54  
55  
56  
57  
58  
59  
60  
There are other factors that may account for more rapid ulcer healing in our study  
such as the high (weekly) frequency of the first four visits in Substudy 2, allowing  
more opportunities for treatment such as wound debridement, and orthotic or  
medication adjustments.

### Implications for a full study

The log of the ulcer area outcome proved sensitive to glycaemic control even controlling for time since study entry, and was correlated with DFS-SF subscores, supporting the use of this measure. This is consistent with prior validation of log ulcer area as a surrogate end point for ulcer healing [27]. Using this measure as primary endpoint, a target reduction in ulcer size of 30% would correspond to a 3 mmol/L average difference in FCBG (corresponding to the difference between the lower bounds of normal glycaemia and a diagnosis of diabetes), with intensive glycaemic control versus standard care. In an RCT, 220 participants per arm would be required to detect a between-group decrease of 30% with 80% power at a 5% significance level. At the differential eligibility rates observed in both periods and assuming a loss to follow-up of 10%, such a number could be achieved within about one year if 15 centres similar to ours were recruiting participants.

Good reductions in FCBG over the first 4 weeks of intensive insulin therapy were seen, but more variable levels observed afterwards. To achieve optimal improvements in glycaemic control over the course of a longer-term RCT more regular visits may be necessary after the first 4-6 weeks of therapy than were used in our feasibility study and more daytime FCBG recordings done to optimise therapy.

The EQ-5D VAS appeared to have good convergent validity with the specialised DFS-SF, indicating its appropriateness as a generic QOL measure in our study population, opening the door to valid economic analyses. We also realise the importance of objective quantification of neuropathy, peripheral vascular disease and foot deformities enabling stratification at randomisation in the larger trial as they are the most notable causative factors of diabetic foot ulceration [11].

1  
2  
3 Tight glycaemic control relies on long-term patient adherence [1][32]. Satisfied  
4 patients are more likely to adhere to recommendations regarding not only medication  
5 use and follow-up visits but also dietary habits and physical activity [33]. Our findings  
6 showed that our participants' perception of diabetes medication burden was strongly  
7 associated with fasting capillary blood glucose and attendance, suggests, although  
8 does not prove, that intervening on burden may promote attendance.  
9  
10  
11  
12  
13  
14  
15  
16

### 17 **Limitations**

18  
19 Some limitations temper the interpretation of our results. The most important  
20 limitation was that Substudy 2 did not reach the target sample size of 20. This  
21 shortfall was largely due to availability of personnel and funder timelines. These  
22 issues, particularly around staffing, have the potential to affect any future RCT.  
23  
24 Moreover, the study was conducted at a single centre in New Zealand, limiting  
25 generalisability to other populations and settings with different care pathways for  
26 diabetes and diabetic complications.  
27  
28

29 Another limitation of this study is that FCBG was the only surrogate for medication  
30 adherence. The addition of other surrogates such as a record of whether  
31 prescriptions had been filled would. Furthermore, in a study aiming to evaluate the  
32 four times a day blood glucose testing is preferable to FCBG and HbA1c.  
33  
34

35 Non-adherence to standard care was an exclusion criterion of this study. This was  
36 included so that the impact of glycaemic control would be the focus of this study.  
37  
38

39 However, this criterion limits the application of the study to the real world as non-  
40 adherence is a major issue in most real-life clinical settings.  
41  
42  
43  
44  
45  
46  
47  
48  
49  
50  
51  
52  
53  
54  
55  
56  
57  
58  
59  
60

## Conclusion

The study has produced evidence of moderate quality that tight glycaemic control may be beneficial for ulcer healing, and that an outcome derived from ulcer area could be sensitive to glycaemic control as expressed by FCBG.

This feasibility study is the first since 2005 to investigate issues relevant to the initiation of a definitive RCT evaluating the impact of intensive insulin therapy on ulcer healing in people with diabetes. The results of such a trial would be useful to inform evidence-based clinical practice guidelines. However, we have also demonstrated that a reasonably powered trial would require the involvement of a large number of centres, increasing the complexity of such an undertaking.

**Acknowledgements** Medical writing assistance was provided by Nicola Ryan, independent medical writer. The authors thank Benjamin Elliott (independent data manager), Lawrence Kingi (podiatrist, Counties Manukau Health) and Dr John Baker (Middlemore Clinical Trials) for their assistance with this study.

**Contributors** A.C.V. and A.D. designed the study and co-wrote the manuscript with V.B. A.D. oversaw the intervention and contributed to the discussion. A.C.V. contributed to data management, data monitoring and analysis planning and conduct. D.P. contributed to statistical analyses. B.M. coordinated the research. R.G. and A.N. provided podiatric care and contributed to discussion. A.D. and A.C.V. take responsibility for the contents of the article, study design, access to data and the decision to submit and publish the results.

**Funding** This work was supported by the Health Research Council of New Zealand's Feasibility Study grant number 14/605.

1  
2  
3 **Disclaimer** The joint lead authors A.D. and A.C.V. affirm that the manuscript is an  
4 honest, accurate and transparent account of the study being reported; that no  
5 important aspects of the study have been omitted except as noted in the text, and  
6 that any discrepancies from the study as planned have been explained.  
7  
8  
9  
10  
11

12 **Competing interests** None declared.  
13

14 **Patient consent** Obtained.  
15

16  
17 **Ethics approval** Ethics approval was given for the study by the New Zealand  
18 Northern A Health and Disability Ethics Committee, ethics approval number  
19 14/NTA/195.  
20  
21  
22

23  
24 **Provenance and peer review** Not commissioned; externally peer-reviewed.  
25

26 **Data sharing statement** Data are available. Please contact corresponding author.  
27  
28  
29  
30  
31  
32  
33  
34  
35  
36  
37  
38  
39  
40  
41  
42  
43  
44  
45  
46  
47  
48  
49  
50  
51  
52  
53  
54  
55  
56  
57  
58  
59  
60

## References

1. Hingorani A, LaMuraglia GM, Henke P, Meissner MH, Loretz L, Zinszer KM, et al. The management of diabetic foot: A clinical practice guideline by the Society for Vascular Surgery in collaboration with the American Podiatric Medical Association and the Society for Vascular Medicine. *J Vasc Surg* [Internet]. 2016 Feb 1;63(2):3S-21S. Available from: <https://doi.org/10.1016/j.jvs.2015.10.003>
2. Australian Institute of Health and Welfare [Internet]. 2008. Available from: <http://www.aihw.gov.au/WorkArea/DownloadAsset.aspx?id=6442453674>
3. Ragnarson Tennvall G, Apelqvist J. Health-Economic Consequences of Diabetic Foot Lesions. *Clin Infect Dis* [Internet]. 2004 Aug 1;39(Supplement\_2):S132–9. Available from: <https://doi.org/10.1086/383275>
4. Stockl K, Vanderplas A, Tafesse E, Chang E. Costs of Lower-Extremity Ulcers Among Patients With Diabetes. *Diabetes Care* [Internet]. 2004 Sep 1;27(9):2129 LP – 2134. Available from: <http://care.diabetesjournals.org/content/27/9/2129.abstract>
5. Treece K, Macfarlane R, Pound N, Game F, Jeffcoate W. Validation of a system of foot ulcer classification in diabetes mellitus. Vol. 21, *Diabetic medicine : a journal of the British Diabetic Association*. 2004. 987–991 p.
6. Clayton W, Elasy TA. A Review of the Pathophysiology, Classification, and Treatment of Foot Ulcers in Diabetic Patients. *Clin Diabetes* [Internet]. 2009 Apr 1;27(2):52 LP – 58. Available from: <http://clinical.diabetesjournals.org/content/27/2/52.abstract>
7. Schaper NC. Lessons from Eurodiale. *Diabetes Metab Res Rev* [Internet]. 2012 Feb 1;28(S1):21–6. Available from: <https://doi.org/10.1002/dmrr.2266>
8. Ikem R, Ikem I, Adebayo O, Soyoye D. An assessment of peripheral vascular disease in patients with diabetic foot ulcer. *Foot* [Internet]. 2010;20(4):114–7. Available from: <http://www.sciencedirect.com/science/article/pii/S0958259210000568>
9. Ogbera OA, Osa E, Edo A, Chukwum E. Common Clinical Features of Diabetic Foot Ulcers: Perspectives From a Developing Nation. *Int J Low Extrem Wounds* [Internet]. 2008 May 19;7(2):93–8. Available from: <https://doi.org/10.1177/1534734608318236>
10. Tesfaye S, Selvarajah D. Advances in the epidemiology, pathogenesis and management of diabetic peripheral neuropathy. *Diabetes Metab Res Rev* [Internet]. 2012 Feb 1;28(S1):8–14. Available from: <https://doi.org/10.1002/dmrr.2239>
11. Fernando ME, Seneviratne RM, Tan YM, Lazzarini PA, Sangla KS, Cunningham M, et al. Intensive versus conventional glycaemic control for treating diabetic foot ulcers. *Cochrane Database Syst Rev* [Internet]. 2016;(1). Available from: <https://doi.org/10.1002/14651858.CD010764.pub2>
12. Hasan R, Firwana B, Elraiyah T, Domecq JP, Prutsky G, Nabhan M, et al. A systematic review and meta-analysis of glycemic control for the prevention of diabetic foot syndrome. *J Vasc Surg* [Internet]. 2016 Feb 1;63(2):22S-28S.e2. Available from: <https://doi.org/10.1016/j.jvs.2015.10.005>
13. Brem H, Sheehan P, Rosenberg HJ, Schneider JS, Boulton AJM. Evidence-Based Protocol for Diabetic Foot Ulcers. *Plast Reconstr Surg* [Internet]. 2006;117(7S). Available from: [https://journals.lww.com/plasreconsurg/Fulltext/2006/06001/Evidence\\_Based\\_Protocol\\_for\\_Diabetic\\_Foot\\_Ulcers.21.aspx](https://journals.lww.com/plasreconsurg/Fulltext/2006/06001/Evidence_Based_Protocol_for_Diabetic_Foot_Ulcers.21.aspx)
14. Christman AL, Selvin E, Margolis DJ, Lazarus GS, Garza LA. Hemoglobin A1c Predicts

- 1  
2  
3  
4  
5  
6  
7  
8  
9  
10  
11  
12  
13  
14  
15  
16  
17  
18  
19  
20  
21  
22  
23  
24  
25  
26  
27  
28  
29  
30  
31  
32  
33  
34  
35  
36  
37  
38  
39  
40  
41  
42  
43  
44  
45  
46  
47  
48  
49  
50  
51  
52  
53  
54  
55  
56  
57  
58  
59  
60
- Healing Rate in Diabetic Wounds. *J Invest Dermatol* [Internet]. 2011 Oct 1;131(10):2121–7. Available from: <https://doi.org/10.1038/jid.2011.176>
15. Lan C-CE, Liu I-H, Fang A-H, Wen C-H, Wu C-S. Hyperglycaemic conditions decrease cultured keratinocyte mobility: implications for impaired wound healing in patients with diabetes. *Br J Dermatol* [Internet]. 2008 Nov 1;159(5):1103–15. Available from: <https://doi.org/10.1111/j.1365-2133.2008.08789.x>
16. Marston WA. Risk factors associated with healing chronic diabetic foot ulcers: The importance of hyperglycemia. Vol. 52, *Ostomy/wound management*. 2006. 26–8, 30, 32 passim p.
17. Miner A, Kirsner RS. Diabetic Control Affects Healing Rates in Neuropathic and Vasculopathic Patients. *J Invest Dermatol* [Internet]. 2011 Oct 1;131(10):1962. Available from: <https://doi.org/10.1038/jid.2011.269>
18. Rathsmann B, Jensen-Urstad K, Nyström T. Intensified insulin treatment is associated with improvement in skin microcirculation and ischaemic foot ulcer in patients with type 1 diabetes mellitus: a long-term follow-up study. *Diabetologia* [Internet]. 2014;57(8):1703–10. Available from: <https://doi.org/10.1007/s00125-014-3248-2>
19. Idris I, Game F, Jeffcoate W. Does close glycaemic control promote healing in diabetic foot ulcers? Report of a feasibility study. *Diabet Med* [Internet]. 2005 Aug 1;22(8):1060–3. Available from: <https://doi.org/10.1111/j.1464-5491.2005.01606.x>
20. Brod M, Christensen T, Kongsø JH, Bushnell DM. Examining and interpreting responsiveness of the Diabetes Medication Satisfaction measure. *J Med Econ* [Internet]. 2009 Dec 1;12(4):309–16. Available from: <https://doi.org/10.3111/13696990903337017>
21. Brod M, Skovlund SE, Wittrup-Jensen KU. Measuring the Impact of Diabetes Through Patient Report of Treatment Satisfaction, Productivity and Symptom Experience. *Qual Life Res* [Internet]. 2006;15(3):481–91. Available from: <https://doi.org/10.1007/s11136-005-1624-6>
22. Monnier L, Lapinski H, Colette C. Contributions of Fasting and Postprandial Plasma Glucose Increments to the Overall Diurnal Hyperglycemia of Type 2 Diabetic Patients. *Diabetes Care* [Internet]. 2003 Mar 1;26(3):881 LP – 885. Available from: <http://care.diabetesjournals.org/content/26/3/881.abstract>
23. Herdman M, Gudex C, Lloyd A, Janssen MF, Kind P, Parkin D, et al. Development and preliminary testing of the new five-level version of EQ-5D (EQ-5D-5L). *Qual Life Res* [Internet]. 2011;20(10):1727–36. Available from: <https://doi.org/10.1007/s11136-011-9903-x>
24. Janssen MF, Pickard AS, Golicki D, Gudex C, Niewada M, Scalone L, et al. Measurement properties of the EQ-5D-5L compared to the EQ-5D-3L across eight patient groups: a multi-country study. *Qual Life Res* [Internet]. 2013;22(7):1717–27. Available from: <https://doi.org/10.1007/s11136-012-0322-4>
25. Bann CM, Fehnel SE, Gagnon DD. Development and validation of the Diabetic Foot Ulcer Scale-Short Form (DFS-SF). *Pharmacoeconomics* [Internet]. 2003;21(17):1277–90. Available from: <https://doi.org/10.2165/00019053-200321170-00004>
26. International Diabetes Federation. Global guideline for type 2 diabetes. 2012;
27. Margolis DJ, Gelfand JM, Hoffstad O, Berlin JA. Surrogate End Points for the Treatment of Diabetic Neuropathic Foot Ulcers. *Diabetes Care* [Internet]. 2003 Jun 1;26(6):1696 LP – 1700. Available from: <http://care.diabetesjournals.org/content/26/6/1696.abstract>



- 1  
2  
3  
4  
5  
6  
7  
8  
9  
10  
11  
12  
13  
14  
15  
16  
17  
18  
19  
20  
21  
22  
23  
24  
25  
26  
27  
28  
29  
30  
31  
32  
33  
34  
35  
36  
37  
38  
39  
40  
41  
42  
43  
44  
45  
46  
47  
48  
49  
50  
51  
52  
53  
54  
55  
56  
57  
58  
59  
60
28. Fielding S, Fayers P, Ramsay CR. Analysing randomised controlled trials with missing data: Choice of approach affects conclusions. *Contemp Clin Trials* [Internet]. 2012 May 1;33(3):461–9. Available from: <https://doi.org/10.1016/j.cct.2011.12.002>
  29. Lee CC, Perkins BA, Kayaniyl S, Harris SB, Retnakaran R, Gerstein HC, et al. Peripheral Neuropathy and Nerve Dysfunction in Individuals at High Risk for Type 2 Diabetes: The PROMISE Cohort. *Diabetes Care* [Internet]. 2015 May 1;38(5):793 LP – 800. Available from: <http://care.diabetesjournals.org/content/38/5/793.abstract>
  30. Margolis DJ, Kantor J, Berlin JA. Healing of diabetic neuropathic foot ulcers receiving standard treatment. A meta-analysis. *Diabetes Care* [Internet]. 1999 May 1;22(5):692 LP – 695. Available from: <http://care.diabetesjournals.org/content/22/5/692.abstract>
  31. Vatankhah N, Jahangiri Y, Landry GJ, Moneta GL, Azarbal AF. Effect of systemic insulin treatment on diabetic wound healing. *Wound Repair Regen* [Internet]. 2017/02/20. 2017 Apr;25(2):288–91. Available from: <https://www.ncbi.nlm.nih.gov/pubmed/28120507>
  32. Pascal I, Ofoedu J, Uchenna N, Nkwa A, Uchamma G. Blood glucose control and medication adherence among adult type 2 diabetic Nigerians attending a primary care clinic in under-resourced environment of Eastern Nigeria. *N Am J Med Sci*. 2012;4(7):310–5.
  33. Al-Aujan S, Al-Aqeel S, Al-Harbi A, Al-Abdulltif E. Patients' satisfaction with diabetes medications in one hospital, Saudi Arabia. *Patient Prefer Adherence* [Internet]. 2012 Oct 12;6:735–40. Available from: <https://www.ncbi.nlm.nih.gov/pubmed/23077410>

## Figure legends

Figure 1 – Substudy 1 recruitment flow diagram

Figure 2 – Point estimate and confidence interval of probability of each criterion

being met by recruitment period. Period A was 0-5 weeks and Period B was 6-35 weeks. FC, full criteria; EC, exclusion criterion; IC, inclusion criterion.

Figure 3 – Histograms of participant scores on the three subscales of the Diabetes Medication Satisfaction questionnaire: (a) Burden, (b) Symptoms and (c) Efficacy subscales. Subscales are scored from 0-100, higher scores indicating greater satisfaction.

Figure 4. Fasting capillary blood glucose against time from study entry during intensive insulin therapy in the 15 participants of substudy 2

## Tables

*Table 1 Entry criteria assessed in Substudy 1*

| Criteria  | Notation | Description                                                                                                                                                   |
|-----------|----------|---------------------------------------------------------------------------------------------------------------------------------------------------------------|
| Inclusion | IC1      | Male or female aged $\geq 18$ years                                                                                                                           |
|           | IC2      | Type 1 or Type 2 diabetes mellitus for more than one year with an HbA1c $\geq 60$ mmol/mol                                                                    |
|           | IC3      | Incident foot ulcer(s) located below the level of the malleoli                                                                                                |
|           | IC4      | Able and willing to undertake home blood glucose monitoring and administer insulin up to 4 times daily under the supervision of the diabetes nurse specialist |
|           | IC5      | Able and willing to provide informed consent to participate in the study                                                                                      |
| Exclusion | EC1      | Ulcers with radiological features of osteomyelitis                                                                                                            |
|           | EC2      | Significant peripheral vascular disease under consideration for re-vascularisation                                                                            |
|           | EC3      | Significant bone deformity as determined by the investigator which may delay wound healing                                                                    |
|           | EC4      | Non-adherence to standard care                                                                                                                                |
|           | EC5      | Any other disease or condition in the opinion of the investigator could make them unsuitable for entry                                                        |
| Full      | FC       | All inclusion criterion satisfied (5-Yes) and all exclusion criterion satisfied (5-No)                                                                        |

EC, exclusion criteria; HbA1c, glycosylated haemoglobin; IC, inclusion criteria.

Table 2 Characteristics of participants included in both substudies

|                                           | Substudy 1<br>Participants (n=78) | Substudy 2<br>Participants (n=15) |
|-------------------------------------------|-----------------------------------|-----------------------------------|
| Median age (IQR), years                   | 58.5 (18.2)                       | 51 (16.5)                         |
| Women, <i>n</i> (%)                       | 30 (38.5)                         | 6 (40)                            |
| Mean baseline HbA1c (SD), mmol/mol        | Not collected                     | 93 (29)                           |
| Mean baseline FCBG (SD), mmol/L           | Not collected                     | 11.3 (5.7)                        |
| Ethnicity, <i>n</i> (%)                   |                                   |                                   |
| Asian                                     | 5 (6.4)                           | 1 (6.7)                           |
| European                                  | 27 (34.6)                         | 4 (26.7)                          |
| Māori                                     | 13 (16.7)                         | 2 (13.3)                          |
| Pacific                                   | 33 (42.3)                         | 7 (46.7)                          |
| Type 1 diabetes mellitus, <i>n</i> (%)    | 12 (15.4)                         | 3 (20.0)                          |
| Type 2 diabetes mellitus, <i>n</i> (%)    | 66 (84.6)                         | 12 (80.0)                         |
| Duration of diabetes, <i>n</i> (%)        |                                   |                                   |
| 0-10 years                                | 15 (19.2)                         | 3 (20.0)                          |
| 10-20 years                               | 31 (39.7)                         | 6 (40.0)                          |
| 20-30 years                               | 22 (28.2)                         | 4 (26.7)                          |
| 30-40 years                               | 7 (9.0)                           | 2 (13.3)                          |
| 40-50 years                               | 3 (3.9)                           | 0 (0.0)                           |
| Peripheral neuropathy, <i>n</i> (%)       | Not collected                     | 15 (100.0)                        |
| Peripheral vascular disease, <i>n</i> (%) | Not collected                     | 1 (6.7)                           |

IQR, interquartile range; HbA1c: glycosylated haemoglobin; FCBG: fasting capillary blood glucose

Table 3 Unadjusted and adjusted regression results for five ulcer-healing endpoints against fasting capillary blood glucose

| Ulcer outcome                                     | Adjustment status | Change in outcome per 1 mmol/L increase in FCBG |                 | Equivalent effect size | P      |    |
|---------------------------------------------------|-------------------|-------------------------------------------------|-----------------|------------------------|--------|----|
|                                                   |                   | Estimate                                        | 95% CI          |                        |        |    |
| Ulcer area (cm <sup>2</sup> ) †                   | Unadjusted        | 0.010                                           | [-0.041,0.062]  | 0.004                  | 0.69   |    |
|                                                   | Adjusted§         | 0.004                                           | [-0.024,0.032]  | 0.001                  | 0.77   |    |
| Log(ulcer area+0.01) †                            | Unadjusted        | 0.134                                           | [0.049,0.214]   | 0.10                   | 0.002  | ** |
|                                                   | Adjusted§         | 0.114                                           | [0.020,0.194]   | 0.08                   | 0.0145 | *  |
| Rate of absolute change (cm <sup>2</sup> /week) † | Unadjusted        | 0.011                                           | [-0.018, 0.041] | 0.01                   | 0.45   |    |
|                                                   | Adjusted¶         | 0.009                                           | [-0.014,0.032]  | 0.01                   | 0.70   |    |
| Rate of relative change (%/week <sup>-1</sup> ) † | Unadjusted        | 5.7                                             | [1.1, 10.3]     | 0.06                   | 0.015  | *  |
|                                                   | Adjusted¶         | 5.7                                             | [1.1,10.3]      | 0.06                   | 0.015  | *  |
| Hazard ratio‡                                     | Unadjusted        | 0.90                                            | [0.74,1.10]     | N/A                    | 0.31   |    |
|                                                   | Adjusted † †      | 0.88                                            | [0.71,1.08]     | N/A                    | 0.21   |    |

† Mixed linear regression, additive change reported ‡ Cox regression, multiplicative change reported

§ Adjusted for baseline value and time since Visit 1. ¶ Adjusted for time since Visit 1 only.

† † Adjusted for baseline ulcer area

FCBG: fasting capillary blood glucose; CI: confidence interval

Table 4 Estimated Pearson correlation coefficients between Diabetic Foot Ulcer Scale-Short Form subscale scores and both log(ulcer area+0.01) and EuroQol 5 Dimension 5 Level

| Correlates<br>DFS-SF subscale | log(ulcer area+0.01)† |                |             | EQ-5D-5L VAS |              |             |
|-------------------------------|-----------------------|----------------|-------------|--------------|--------------|-------------|
|                               | Est.                  | 95% CI         | P           | Est.         | 95% CI       | P           |
| Leisure                       | -0.48                 | [-0.66, -0.25] | <0.0001 *** | 0.50         | [0.23, 0.77] | 0.0002 ***  |
| Physical health               | -0.48                 | [-0.66, -0.26] | <0.0001 *** | 0.64         | [0.44, 0.84] | <0.0001 *** |
| Dependence                    | -0.54                 | [-0.71, -0.33] | <0.0001 *** | 0.58         | [0.36, 0.81] | <0.0001 *** |
| Negative emotion              | -0.64                 | [-0.80, -0.42] | <0.0001 *** | 0.38         | [0.04, 0.72] | 0.03 *      |
| Worried about ulcers          | -0.54                 | [-0.71, -0.32] | <0.0001 *** | 0.62         | [0.38, 0.86] | <0.0001 *** |
| Bothered by ulcer care        | -0.46                 | [-0.63, -0.24] | 0.0001 ***  | 0.36         | [0.04, 0.69] | 0.03 *      |

† Area in cm<sup>2</sup>.

CI, confidence interval; DFS-SF: Diabetic Foot Ulcer Scale-Short Form; EQ-5D-5L: EuroQol 5 Dimension 5 Level; VAS: visual analogue scale.

1  
2  
3  
4  
5  
6  
7  
8  
9  
10  
11  
12  
13  
14  
15  
16  
17  
18  
19  
20  
21  
22  
23  
24  
25  
26  
27  
28  
29  
30  
31  
32  
33  
34  
35  
36  
37  
38  
39  
40  
41  
42  
43  
44  
45  
46  
47  
48  
49  
50  
51  
52  
53  
54  
55  
56  
57  
58  
59  
60

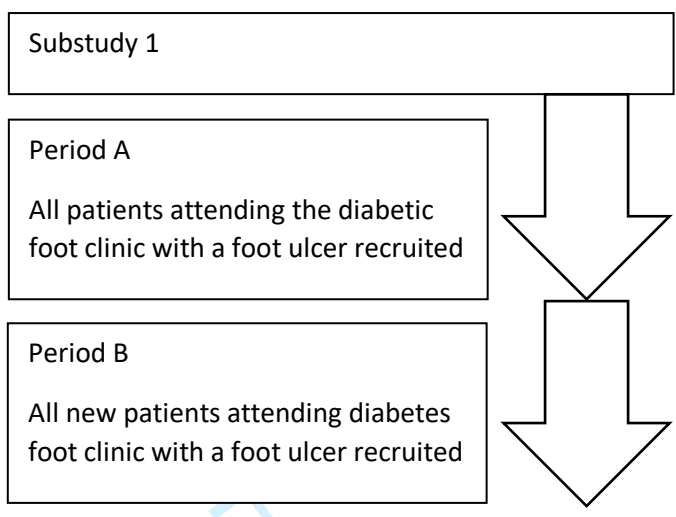

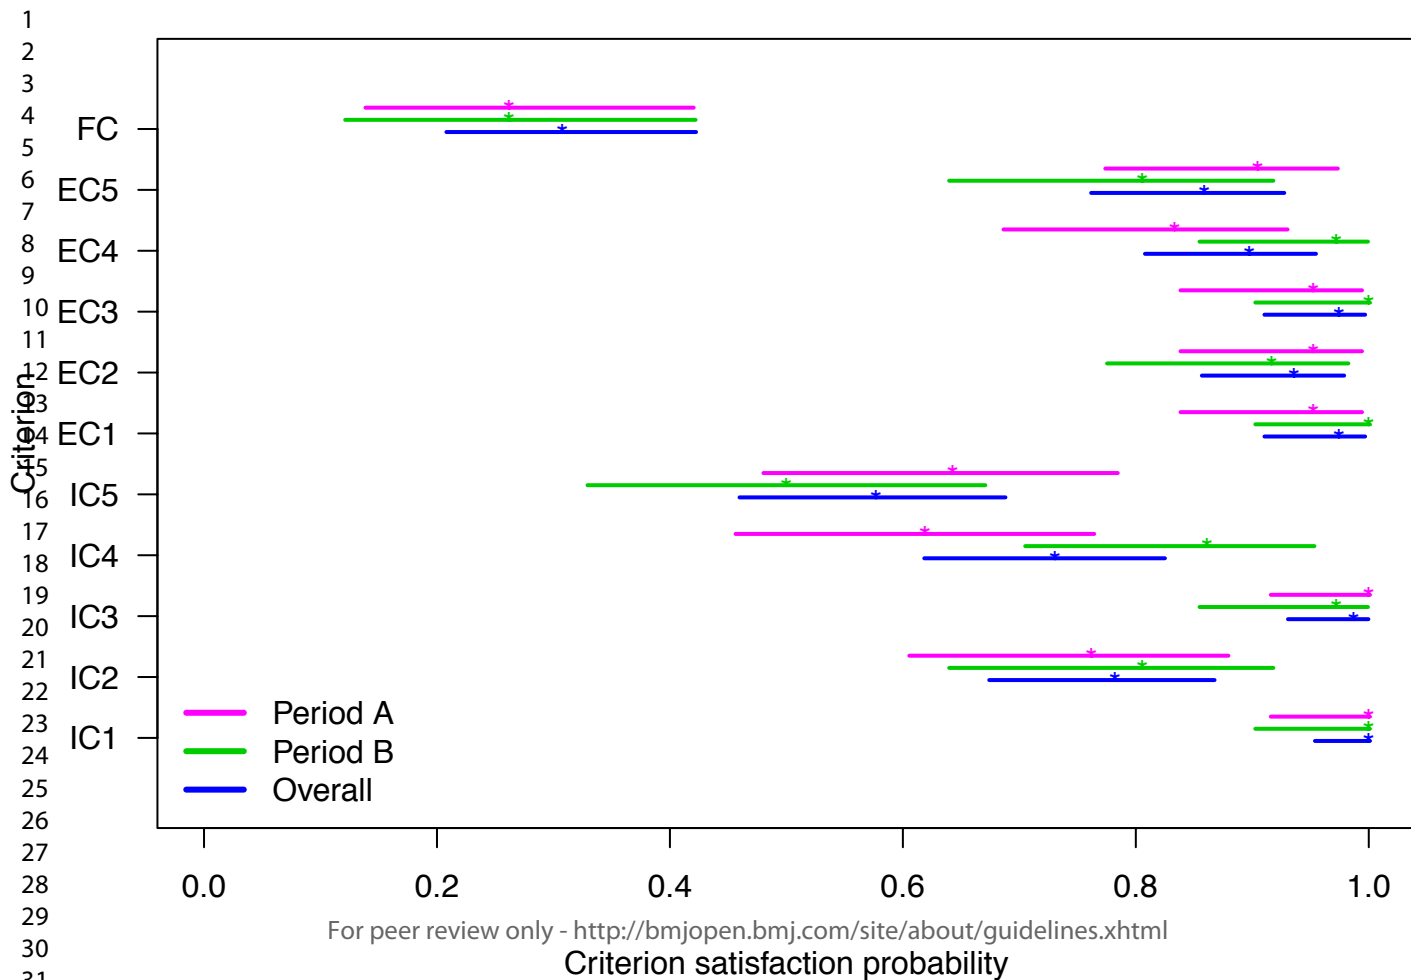





For peer review only - <http://bmjopen.bmj.com/site/about/guidelines.xhtml>

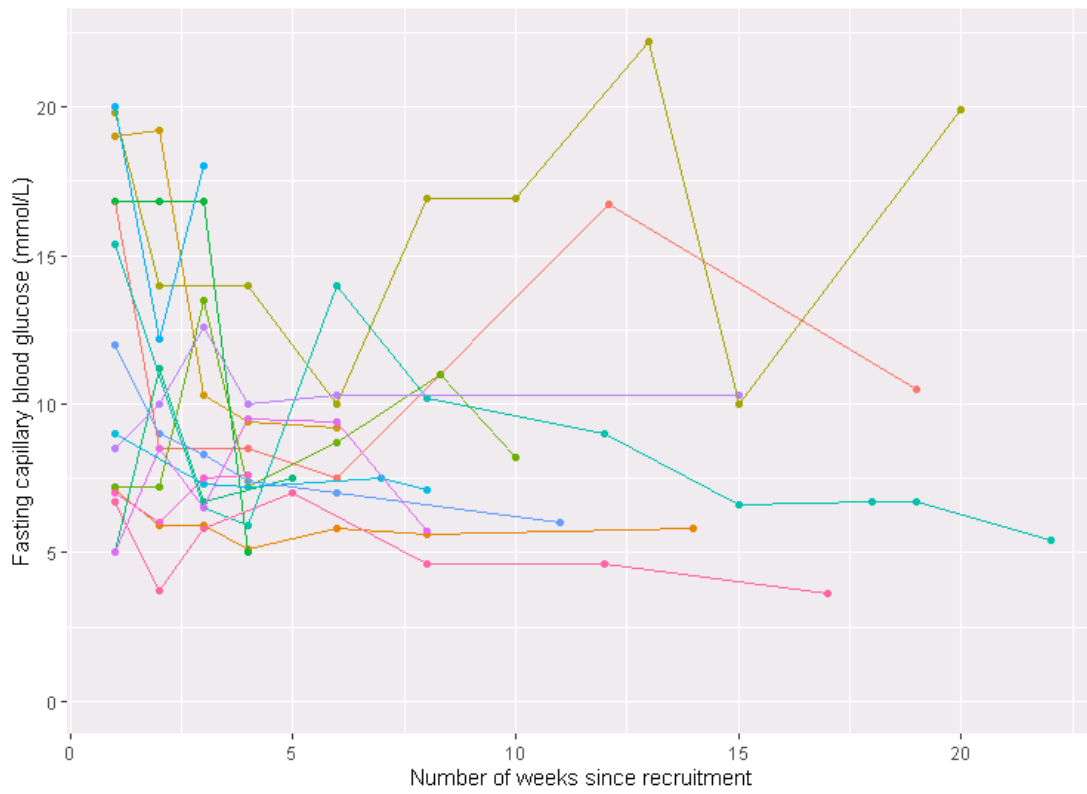

review only

STROBE Statement—checklist of items that should be included in reports of observational studies

|                    | Item No. | Recommendation                                                                                      | Page No. | Relevant text from manuscript                                                                                                                                                                                                                                                                                                                                                                                                                                                                                                                                                                                                                                                                                                                                                                                                                                                                                                                                                                                                                                                                                                                                                                                                                                                                                                                                                                                                                                                                                                                                                                                                                                       |
|--------------------|----------|-----------------------------------------------------------------------------------------------------|----------|---------------------------------------------------------------------------------------------------------------------------------------------------------------------------------------------------------------------------------------------------------------------------------------------------------------------------------------------------------------------------------------------------------------------------------------------------------------------------------------------------------------------------------------------------------------------------------------------------------------------------------------------------------------------------------------------------------------------------------------------------------------------------------------------------------------------------------------------------------------------------------------------------------------------------------------------------------------------------------------------------------------------------------------------------------------------------------------------------------------------------------------------------------------------------------------------------------------------------------------------------------------------------------------------------------------------------------------------------------------------------------------------------------------------------------------------------------------------------------------------------------------------------------------------------------------------------------------------------------------------------------------------------------------------|
| Title and abstract | 1        | (a) Indicate the study’s design with a commonly used term in the title or the abstract              | Abstract | Two substudies: one cross-sectional, one single-arm prospective                                                                                                                                                                                                                                                                                                                                                                                                                                                                                                                                                                                                                                                                                                                                                                                                                                                                                                                                                                                                                                                                                                                                                                                                                                                                                                                                                                                                                                                                                                                                                                                                     |
|                    |          | (b) Provide in the abstract an informative and balanced summary of what was done and what was found | Abstract | <p><i>What was done:</i></p> <p><b>Setting</b> Single-centre secondary care diabetic foot clinic located in New Zealand.</p> <p><b>Participants</b> Substudy 1: 78 participants consisting of all people ≥18 years with a diabetic foot ulcer presenting to the clinic over 35 weeks in 2015. Substudy 2: 15 participants from Substudy 1 consenting to intensive insulin therapy.</p> <p><b>Intervention</b> None in Substudy 1. Intensive insulin therapy combined with standard podiatry care over 24 weeks.</p> <p><b>Outcome measures</b> Substudy 1: Proportion of participants satisfying potential entry criteria to the RCT. Substudy 2: Glycaemic control (fasting capillary blood sugar; FCBS); time to index ulcer healing; index ulcer size; medication satisfaction (DiabMedSat scores); and health-related quality of life (HrQOL; EQ-5D-5L and DFS-SF scores)..</p> <p><i>What was found:</i></p> <p><b>Results</b> Proportion in Substudy 1 fulfilling all entry criteria was 31% (95% CI 21 to 42). FCBS values declined between baseline and study end (difference -3.7 mmol/L, 95% CI -6.5 to -0.8), suggesting adherence to therapeutic regimen; 83% (95% CI 44 to 95) of ulcers healed by 24 weeks. FCBS correlated negatively, and weakly-to-moderately, with medication satisfaction. Log(ulcer area in cm<sup>2</sup>+0.01) was most sensitive to FCBS changes, correlating negatively, and moderately-to-strongly with QOL measures. Detecting a 30% between-group difference in the ulcer area logarithm (80% power, α=5%) requires 220 participants per arm, achievable within 1 year with 15 centres similar to the study setting.</p> |

| <b>Introduction</b>  |   |                                                                                      |     |                                                                                                                                                                                                                                                                                                                                                                                                                                                                                                                                                                                                                                                                                                                                                                                                                                                                                                                                                                                                                                                                                                                                   |
|----------------------|---|--------------------------------------------------------------------------------------|-----|-----------------------------------------------------------------------------------------------------------------------------------------------------------------------------------------------------------------------------------------------------------------------------------------------------------------------------------------------------------------------------------------------------------------------------------------------------------------------------------------------------------------------------------------------------------------------------------------------------------------------------------------------------------------------------------------------------------------------------------------------------------------------------------------------------------------------------------------------------------------------------------------------------------------------------------------------------------------------------------------------------------------------------------------------------------------------------------------------------------------------------------|
| Background/rationale | 2 | Explain the scientific background and rationale for the investigation being reported | 5   | [...]clinical practice guidelines from the Society for Vascular Surgery, American Podiatric Medical Association, and Society for Vascular Medicine now recommend adequate glycaemic control (glycosylated haemoglobin [HbA1c] <53 mmol/mol) to reduce the incidence of diabetic foot ulcers 1. The evidence that improved glycaemic control can accelerate the healing of foot ulcers and reduce the incidence of ulceration and amputation remains observational 11-17. There is no randomised trial evidence that tight glycaemic control improves ulcer wound healing 18. A previous feasibility study in this area 19 concluded 15 years ago that a definitive randomised trial in this area was not feasible, possibly due to exacting entry criteria. To investigate further whether a randomised controlled trial (RCT) evaluating the efficacy of intensive insulin therapy on diabetic foot ulcer healing is possible, this two-part feasibility study sought appropriate but less stringent trial entry criteria to improve accrual rates (Substudy 1) and sought appropriate endpoints for such a trial (Substudy 2).. |
| Objectives           | 3 | State specific objectives, including any prespecified hypotheses                     | 6   | The primary objective of Substudy 1 was to estimate the proportion of participants satisfying the entry criteria for the planned RCT.. [...]Secondary objectives were to estimate the length of the recruitment period for the intended RCT, and determine participant satisfaction with their diabetes medication.<br><br>In Substudy 2, the main objective was to determine a primary endpoint for the RCT by analysing sensitivity of ulcer healing-related outcomes [...]to glycaemic control accounting for standard podiatry care. The ulcer healing outcome measure with the best association with glycaemic control was to be assessed for convergent validity with an established foot ulcer scale. Secondary objectives included examining the relationship between adherence (using glycaemic control as proxy), as well as attendance, and satisfaction with diabetes medication, and evaluating health-related quality of life (HrQOL) measures in this population.                                                                                                                                                  |
| <b>Methods</b>       |   |                                                                                      |     |                                                                                                                                                                                                                                                                                                                                                                                                                                                                                                                                                                                                                                                                                                                                                                                                                                                                                                                                                                                                                                                                                                                                   |
| Study design         | 4 | Present key elements of study design early in the paper                              | 7   | <i>First paragraph of Setting and Study Design section:</i><br>Substudy 1 was a cross-sectional study enrolling all people aged $\geq 18$ years with diabetes and a current foot ulcer presenting at the CMH Diabetes Foot Clinic over a period of 24 weeks. Substudy 2 was a single-arm interventional study enrolling Substudy 1 participants meeting all entry criteria (below) and treating them with intensive insulin therapy for 24 weeks.                                                                                                                                                                                                                                                                                                                                                                                                                                                                                                                                                                                                                                                                                 |
| Setting              | 5 | Describe the setting, locations, and relevant                                        | 7-8 | <i>Setting, location and relevant dates, including periods of recruitment, follow-up:</i>                                                                                                                                                                                                                                                                                                                                                                                                                                                                                                                                                                                                                                                                                                                                                                                                                                                                                                                                                                                                                                         |

1  
2 dates, including periods of  
3 recruitment, exposure,  
4 follow-up, and data  
5 collection  
6  
7

The study was conducted at the Counties Manukau Health (CMH) Diabetes Foot Clinic in Auckland, New Zealand between February and October 2015, with Substudy 2 follow-up to February 2016. [...]Substudy 2 was a single-arm interventional study enrolling Substudy 1 participants meeting all entry criteria (below) and treating them with intensive insulin therapy for 24 weeks.

8  
9 *Data collection:*  
10 Their foot wound(s) (index ulcers) were inspected, and entry criteria status (Table 1) and demographic data recorded. In Substudy 2, visits occurred weekly between weeks 1 (baseline) and 4, then at 6, 8, 12, 16, 20 and 24 weeks, or until the index ulcers healed.

13  
14 Participants 6 (a) Cohort study—Give 7 + Table 1  
15 the eligibility criteria, and  
16 the sources and methods  
17 of selection of  
18 participants. Describe  
19 methods of follow-up  
20 *Cross-sectional study*—  
21 Give the eligibility  
22 criteria, and the sources  
23 and methods of selection  
24 of participants  
25  
26  
27  
28  
29  
30  
31  
32  
33  
34  
35  
36  
37  
38  
39  
40  
41

*Cross-sectional:*  
Substudy 1 was a cross-sectional study that enrolled all people aged ≥18 years with diabetes and a current foot ulcer presenting at the CMH Diabetes Foot Clinic over a period of 24 weeks.  
*Longitudinal:*  
Substudy 2 was a single-arm interventional study that enrolled Substudy 1 participants meeting all entry criteria (Table 1)

**Table 1** Entry criteria assessed in Substudy 1 (primary objective)

| Criteria      | Notation | Description                                                                                                                                                   |
|---------------|----------|---------------------------------------------------------------------------------------------------------------------------------------------------------------|
| Inclusion     | IC1      | Male or female aged ≥18 years                                                                                                                                 |
|               | IC2      | Type 1 or Type 2 diabetes mellitus for more than one year with an HbA <sub>1c</sub> ≥60 mmol/mol (≥7.6%)                                                      |
|               | IC3      | Incident foot ulcer(s) located below the level of the malleoli                                                                                                |
|               | IC4      | Able and willing to undertake home blood glucose monitoring and administer insulin up to 4 times daily under the supervision of the diabetes nurse specialist |
|               | IC5      | Able and willing to provide informed consent to participate in the study                                                                                      |
| Exclusion     | EC1      | Ulcers with radiological features of osteomyelitis                                                                                                            |
|               | EC2      | Significant peripheral vascular disease under consideration for re-vascularisation                                                                            |
|               | EC3      | Significant bone deformity as determined by the investigator which may delay wound healing                                                                    |
|               | EC4      | Non-adherence to standard care                                                                                                                                |
|               | EC5      | Any other disease or condition in the opinion of the investigator could make them unsuitable for entry                                                        |
| Full Criteria | FC       | All inclusion criterion satisfied (5-Yes) and all exclusion criterion satisfied (5-No)                                                                        |

---

EC, exclusion criteria; HbA<sub>1c</sub>, glycosylated haemoglobin; IC, inclusion criteria.

---

(b) *Cohort study*—For matched studies, give matching criteria and number of exposed and unexposed

*Case-control study*—For matched studies, give matching criteria and the number of controls per case

---

|                           |    |                                                                                                                                                                                      |    |                                                                                                                                                                                                                                                                                                                                                                                                                                                                                                                                                                                                                                                                                                                                                                                                                                                                                                                                                               |
|---------------------------|----|--------------------------------------------------------------------------------------------------------------------------------------------------------------------------------------|----|---------------------------------------------------------------------------------------------------------------------------------------------------------------------------------------------------------------------------------------------------------------------------------------------------------------------------------------------------------------------------------------------------------------------------------------------------------------------------------------------------------------------------------------------------------------------------------------------------------------------------------------------------------------------------------------------------------------------------------------------------------------------------------------------------------------------------------------------------------------------------------------------------------------------------------------------------------------|
| Variables                 | 7  | Clearly define all outcomes, exposures, predictors, potential confounders, and effect modifiers. Give diagnostic criteria, if applicable                                             | 8  | <p><b>Study procedures and outcomes</b></p> <p>Substudy 1 participants completed a Diabetes Medication Satisfaction (DiabMedSat) questionnaire. Their foot wound(s) (index ulcers) were inspected, and entry criteria status (Table 1) and demographic data recorded. In Substudy 2, [...] [t]he following were undertaken at each visit: ulcer examination: digital photographic planimetry of ulcer area (using the SilhouetteStar camera, ARANZ Medical, New Zealand); FCBS measurement (in mmol/L); medication review; and adverse events assessment. FCBS was used in the analyses as a measure of glycaemic control and as a proxy for adherence. HbA1c was assessed at baseline and at the end of trial, providing an assessment of chronic hyperglycaemia. [...]. In addition, participants completed three questionnaires at each visit: DiabMedSat, EuroQol 5 Dimensions 5 Levels (EQ-5D-5L) and Diabetic Foot Ulcer Scale-Short Form (DFS-SF).</p> |
| Data sources/ measurement | 8* | For each variable of interest, give sources of data and details of methods of assessment (measurement). Describe comparability of assessment methods if there is more than one group |    | <p><i>See 7 above. No comparator group is used in this feasibility study.</i></p>                                                                                                                                                                                                                                                                                                                                                                                                                                                                                                                                                                                                                                                                                                                                                                                                                                                                             |
| Bias                      | 9  | Describe any efforts to address potential sources of bias                                                                                                                            | 9  | <p><i>Substudy 1 – bias due to differential initial and later recruitment:</i></p> <p>A Poisson exact test was used to compare recruitment rates over two recruitment periods and mixed logistic regression used to compare differences in entry criteria fulfilment between the periods.</p> <p><i>Substudy 2 – bias due to confounding by time::</i></p> <p>Linear mixed models were used to determine the relationship between four different ulcer area-related outcomes at each visit [...] and glycaemic control. (The value of 0.01 in the logarithmic endpoint was chosen on the basis of the data to improve the normality of the outcome.) [...]. Time- and/or baseline ulcer area-adjusted estimates, as well as unadjusted estimates, were produced to assess potential confounding, as tight management in a foot clinic may promote ulcer healing in several ways.</p>                                                                          |
|                           |    |                                                                                                                                                                                      | 10 | <p><i>Substudy 2 – bias due to missingness:</i></p>                                                                                                                                                                                                                                                                                                                                                                                                                                                                                                                                                                                                                                                                                                                                                                                                                                                                                                           |

[The non-survival] analyses all involved mixed models on longitudinal data, known to alleviate selection bias due to missingness.

*The relevant sources of bias for the main study (for which this is a feasibility study) is bias due to loss to follow-up or missingness. Accordingly, we have attempted to briefly characterise participant attendance:*

Descriptive statistics were produced on completed follow-ups (defined as healing before 24 weeks or attending the 24-week visit) and attended visits. Attendance probability was regressed on the most recently available FCBS, measure of ulcer area and DiabMedSat subscores using mixed logistic regression.

|                        |    |                                                                                                                              |      |                                                                                                                                                                                                                                                                                                                                                                                                                                                                                                                                                                                                                                                                                                                                                                                                                                                                                                                                                                                                                                                       |
|------------------------|----|------------------------------------------------------------------------------------------------------------------------------|------|-------------------------------------------------------------------------------------------------------------------------------------------------------------------------------------------------------------------------------------------------------------------------------------------------------------------------------------------------------------------------------------------------------------------------------------------------------------------------------------------------------------------------------------------------------------------------------------------------------------------------------------------------------------------------------------------------------------------------------------------------------------------------------------------------------------------------------------------------------------------------------------------------------------------------------------------------------------------------------------------------------------------------------------------------------|
| Study size             | 10 | Explain how the study size was arrived at                                                                                    | 7    | <p><b>Accrual period and sample size</b></p> <p>The accrual period for Substudy 1 (35 weeks) was selected as long as possible while respecting contractual obligations with the study funder.[...]</p> <p>Substudy 2 aimed to recruit 20 participants. Assuming 10% attrition, this number is sufficient to estimate the standard deviation of a continuous variable (e.g. ulcer area) with a coefficient of variation inferior to 0.2. This criterion is consistent with the goal of identifying a sensitive primary endpoint endowed with good precision.</p>                                                                                                                                                                                                                                                                                                                                                                                                                                                                                       |
| Quantitative variables | 11 | Explain how quantitative variables were handled in the analyses. If applicable, describe which groupings were chosen and why | 9-10 | <p><i>Substudy 1:</i></p> <p>Descriptive statistics were produced for [...] DiabMedSat subscores. Multivariate analysis of variance (MANOVA) was used to detect differences in subscores based on demographic or participant characteristics. [...] [M]ixed logistic regression [was] used to compare differences in entry criteria fulfilment between the periods. Indicators of criterion satisfaction were fitted jointly by themselves in a first model, and interacting with period in a second model.</p> <p><i>Substudy 2:</i></p> <p>[...]</p> <p>Linear mixed models were used to determine the relationship between four different ulcer area-related outcomes at each visit (ulcer area in cm<sup>2</sup>, log[ulcer area+0.01], absolute and relative rates of change in ulcer area, where “log” is the natural logarithm function) and glycaemic control. (The value of 0.01 in the logarithmic endpoint was chosen based on the data to improve the normality of the outcome.) FCBS was the fixed effect and participant the random</p> |



effect. [...]The most sensitive outcome was selected by consideration of its time-adjusted observed significance level and its equivalent Cohen's effect size where appropriate. To estimate correlations and their 95% confidence intervals (CI) using longitudinal data, we fitted outcomes jointly using a heterogeneous compound symmetry covariance model, and using only intercepts as fixed effects. We thus obtained correlations between DFS-SF subscores and selected ulcer healing outcome; between DiabMedSat subscores and FCBS; and between DFS-SF subscores and EQ-5D-5L. (*And before any non-statistical reviewer vociferates that this makes no sense, they should talk to a statistician.*)

Descriptive statistics were produced on completed follow-ups (defined as healing before 24 weeks or attending the 24-week visit) and attended visits. Attendance probability was regressed on the most recently available FCBS, measure of ulcer area and DiabMedSat subscores using mixed logistic regression. The final attendance model was selected using AIC.

|                     |    |                                                                                       |   |                                                                                                                                                                                                                                                                                                                                                                                                                                                                                                                                                                                                                                                                                                                                                                                                                                          |
|---------------------|----|---------------------------------------------------------------------------------------|---|------------------------------------------------------------------------------------------------------------------------------------------------------------------------------------------------------------------------------------------------------------------------------------------------------------------------------------------------------------------------------------------------------------------------------------------------------------------------------------------------------------------------------------------------------------------------------------------------------------------------------------------------------------------------------------------------------------------------------------------------------------------------------------------------------------------------------------------|
| Statistical methods | 12 | (a) Describe all statistical methods, including those used to control for confounding | 9 | <p><i>See 11 above, to which we add:</i></p> <p><i>Substudy 1:</i></p> <p>Descriptive statistics were produced for participant demographic characteristics, recruitment rate, entry criteria fulfilment [...].</p> <p>A Poisson exact test was used to compare recruitment rates over two recruitment periods [...].</p> <p><i>Substudy 2:</i></p> <p>Time-to-healing was considered as a fifth possible outcome, and Cox regression used to estimate the hazard ratio of ulcer healing under changes in FCBS, taken as a time-dependent covariate.</p> <p><i>Substudy 2 – in regard to confounding:</i></p> <p>Time- and/or baseline ulcer area-adjusted estimates, as well as unadjusted estimates, were produced to assess potential confounding, as tight management in a foot clinic may promote ulcer healing in several ways.</p> |
|                     |    | (b) Describe any methods used to examine subgroups and interactions                   | 9 | <p><i>Applies to Substudy 1 only:</i></p> <p>[...] [M]ixed logistic regression [was] used to compare differences in entry criteria fulfilment between the periods. Indicators of criterion satisfaction were fitted jointly by themselves in a first model, and interacting with period in a second model. Models were compared using a deviance test.</p>                                                                                                                                                                                                                                                                                                                                                                                                                                                                               |

|    |              |                     |            |                                                                                                                                                                        |
|----|--------------|---------------------|------------|------------------------------------------------------------------------------------------------------------------------------------------------------------------------|
| 1  |              |                     |            |                                                                                                                                                                        |
| 2  |              | (c) Explain how     | 10         | (Note: No missing data in Substudy 1).                                                                                                                                 |
| 3  |              | missing data were   |            |                                                                                                                                                                        |
| 4  |              | addressed           |            | No data were missing for time-to-healing analyses. Other analyses all involved mixed models on longitudinal data, known to alleviate selection bias due to missingness |
| 5  |              |                     |            |                                                                                                                                                                        |
| 6  |              | (d) Cohort          | 10         | Cross-sectional Substudy 1: not applicable                                                                                                                             |
| 7  |              | study—If            |            |                                                                                                                                                                        |
| 8  |              | applicable,         |            | Longitudinal Substudy 2:                                                                                                                                               |
| 9  |              | explain how loss    |            | Descriptive statistics were produced on completed follow-ups (defined as healing before 24 weeks or attending the                                                      |
| 10 |              | to follow-up was    |            | 24-week visit) and attended visits. Attendance probability was regressed on the most recently available FCBS,                                                          |
| 11 |              | addressed           |            | measure of ulcer area and DiabMedSat subscores using mixed logistic regression. The final attendance model was                                                         |
| 12 |              | Cross-sectional     |            | selected using AIC.                                                                                                                                                    |
| 13 |              | study—If            |            |                                                                                                                                                                        |
| 14 |              | applicable,         |            | See also 12 (c).                                                                                                                                                       |
| 15 |              | describe analytical |            |                                                                                                                                                                        |
| 16 |              | methods taking      |            |                                                                                                                                                                        |
| 17 |              | account of          |            |                                                                                                                                                                        |
| 18 |              | sampling strategy   |            |                                                                                                                                                                        |
| 19 |              | (e) Describe any    | 10         | Arguably, our main analysis for Substudy 2 is a sensitivity analysis:                                                                                                  |
| 20 |              | sensitivity         |            | Linear mixed models were used to determine the relationship between four different ulcer area-related outcomes at                                                      |
| 21 |              | analyses            |            | each visit (ulcer area in cm <sup>2</sup> , log[ulcer area+0.01], absolute and relative rates of change in ulcer area) and glycaemic                                   |
| 22 |              |                     |            | control. (The value of 0.01 in the logarithmic endpoint was chosen based on the data to improve the normality of the                                                   |
| 23 |              |                     |            | outcome.) FCBS was the fixed effect and participant the random effect. Time-to-healing was considered as a fifth                                                       |
| 24 |              |                     |            | possible outcome. A Kaplan-Meier estimate of ulcer persistence probability was produced and Cox regression used                                                        |
| 25 |              |                     |            | to estimate the hazard ratio of ulcer healing under changes in FCBS, taken as a time-dependent covariate. Time-                                                        |
| 26 |              |                     |            | and/or baseline ulcer area-adjusted estimates, as well as unadjusted estimates, were produced to assess potential                                                      |
| 27 |              |                     |            | confounding, as tight management in a foot clinic may promote ulcer healing in several ways. The most sensitive                                                        |
| 28 |              |                     |            | outcome was selected by consideration of its adjusted observed significance level and its equivalent Cohen's effect                                                    |
| 29 |              |                     |            | size where appropriate.                                                                                                                                                |
| 30 |              |                     |            |                                                                                                                                                                        |
| 31 |              |                     |            |                                                                                                                                                                        |
| 32 |              |                     |            |                                                                                                                                                                        |
| 33 |              |                     |            |                                                                                                                                                                        |
| 34 |              |                     |            |                                                                                                                                                                        |
| 35 |              |                     |            |                                                                                                                                                                        |
| 36 |              |                     |            |                                                                                                                                                                        |
| 37 |              |                     |            |                                                                                                                                                                        |
| 38 |              | <b>Results</b>      |            |                                                                                                                                                                        |
| 39 | Participants | 13*                 | (a) Report | 10                                                                                                                                                                     |
| 40 |              |                     | numbers of |                                                                                                                                                                        |
| 41 |              |                     |            | Substudy 1:                                                                                                                                                            |
| 42 |              |                     |            | Seventy-eight participants (all unique clinic visitors during the recruitment period) were enrolled in Substudy 1.                                                     |
| 43 |              |                     |            |                                                                                                                                                                        |
| 44 |              |                     |            |                                                                                                                                                                        |
| 45 |              |                     |            |                                                                                                                                                                        |
| 46 |              |                     |            |                                                                                                                                                                        |

1  
2  
3  
4  
5  
6  
7  
8  
9  
10  
11  
12  
13  
14  
15  
16  
17  
18  
19  
20  
21  
22  
23  
24  
25  
26  
27  
28  
29  
30  
31  
32  
33  
34  
35  
36  
37  
38  
39  
40  
41  
42  
43  
44  
45  
46

|                  |                                                                                                                                              |                                                                                                                                                                             |                                                                                                                                                                                                                             |                                                                                                                                                                                                                                                                                                                                                                                                                                                                                                                                                                                                                                                                                                                                          |
|------------------|----------------------------------------------------------------------------------------------------------------------------------------------|-----------------------------------------------------------------------------------------------------------------------------------------------------------------------------|-----------------------------------------------------------------------------------------------------------------------------------------------------------------------------------------------------------------------------|------------------------------------------------------------------------------------------------------------------------------------------------------------------------------------------------------------------------------------------------------------------------------------------------------------------------------------------------------------------------------------------------------------------------------------------------------------------------------------------------------------------------------------------------------------------------------------------------------------------------------------------------------------------------------------------------------------------------------------------|
|                  |                                                                                                                                              | individuals at each stage of study—eg numbers potentially eligible, examined for eligibility, confirmed eligible, included in the study, completing follow-up, and analysed |                                                                                                                                                                                                                             | <p><i>Substudy 2:</i><br/>(page 8): Substudy 2 was a single-arm interventional study that enrolled Substudy 1 participants meeting all entry criteria [...].<br/>(page 11): Seventy-eight participants (all unique clinic visitors during the recruitment period) were enrolled in Substudy 1 [...].<br/>(page 12 – this is apparently out of order because it is a feasibility result):. Twenty-four participants (30.8% [95% CI 20.8, 42.2]) met all criteria.<br/>(page 12): Seventeen participants entered Substudy 2. One withdrew consent after Visit 1 and another was healed on Visit 1, leaving 15 participants in the analysis set.<br/>(page 12): Two participants with unhealed ulcers did not attend the 24-week visit.</p> |
|                  | (b) Give reasons for non-participation at each stage                                                                                         | 11                                                                                                                                                                          | <p><i>Substudy 2:</i><br/>One withdrew consent after Visit 1 and another was healed on Visit 1, leaving 15 participants in the analysis set.</p>                                                                            |                                                                                                                                                                                                                                                                                                                                                                                                                                                                                                                                                                                                                                                                                                                                          |
|                  | (c) Consider use of a flow diagram                                                                                                           |                                                                                                                                                                             | <i>The flow appears to us to be simple enough not to warrant a diagram.</i>                                                                                                                                                 |                                                                                                                                                                                                                                                                                                                                                                                                                                                                                                                                                                                                                                                                                                                                          |
| Descriptive data | 14* (a) Give characteristics of study participants (eg demographic, clinical, social) and information on exposures and potential confounders | 7                                                                                                                                                                           | <p><i>Substudy 1 (see also Table 1):</i><br/>Mean age was 57.3 years (SD 14.0). The majority were men and most were of Pacific or European ethnicity. (Table 2).<br/><br/><i>Substudy 2 – see Table 2</i></p>               |                                                                                                                                                                                                                                                                                                                                                                                                                                                                                                                                                                                                                                                                                                                                          |
|                  | (b) Indicate number of participants with missing data for                                                                                    | 11                                                                                                                                                                          | <p><i>Substudy 2:</i><br/>Clinical constraints or patient choice prevented some measurements from being taken, yielding completeness proportions for specific outcomes between 78% (DMS and FCBS) and 85% (ulcer area).</p> |                                                                                                                                                                                                                                                                                                                                                                                                                                                                                                                                                                                                                                                                                                                                          |

|              |     |                                                                                                      |    |                                                                                                                                                                                                                                                                                                                                                                                                                                                                                                      |
|--------------|-----|------------------------------------------------------------------------------------------------------|----|------------------------------------------------------------------------------------------------------------------------------------------------------------------------------------------------------------------------------------------------------------------------------------------------------------------------------------------------------------------------------------------------------------------------------------------------------------------------------------------------------|
|              |     | each variable of interest                                                                            |    |                                                                                                                                                                                                                                                                                                                                                                                                                                                                                                      |
|              |     | (c) <i>Cohort study</i> —Summarise follow-up time (eg, average and total amount)                     | 11 | <i>Substudy 2:</i><br><b>Completeness</b><br>Of the 102 scheduled visits, 12 were missed [...].The average follow-up time to healing or last visit was 17.6 weeks (SD 7.8).                                                                                                                                                                                                                                                                                                                          |
| Outcome data | 15* | <i>Cohort study</i> —Report numbers of outcome events or summary measures over time                  | 12 | <i>Substudy 2:</i><br>Twelve Substudy 2 participants experienced complete healing between weeks 3 and 24; the remaining three had unhealed ulcers at the time of their last visit on or before week 24. Median ulcer healing time was 7 weeks. The Kaplan-Meier estimate of the proportion of ulcers not healing by week 24 was 16.7% (95% CI 5.0–56.1%).<br><i>Table 4 for summary correlations</i>                                                                                                 |
|              |     | <i>Case-control study</i> —Report numbers in each exposure category, or summary measures of exposure |    |                                                                                                                                                                                                                                                                                                                                                                                                                                                                                                      |
|              |     | <i>Cross-sectional study</i> —Report numbers of outcome events or summary measures                   | 8  | <i>Substudy 1:</i><br><b>Recruitment rate and entry criteria</b><br>Period A (as defined earlier) finished after 6 weeks, and was the most active with 42 participants recruited compared with 36 participants over the remaining 29 weeks, forming Period B.<br>All participants satisfied criterion IC1, 78.2% met IC2, 98.7% met IC3, 73.1% met IC4 and 57.7% met IC5. Twenty-four participants (30.8% [95% CI 20.8, 42.2]) met all criteria.<br>[...]<br><b>Diabetes Medication Satisfaction</b> |

Higher scores on the DiabMedSat subscales indicate increased satisfaction for all three subscales. The subscale histograms are displayed in Figure 2. Median score for the Efficacy subscale was 63.3 (interquartile range [IQR] 26.7), and was numerically lower than those of the Burden (81.8 [IQR 22.8]) and Symptom subscales (80.0 [IQR 16.0]).

Main results 16 (a) Give unadjusted estimates and, if applicable, confounder-adjusted estimates and their precision (eg, 95% confidence interval). Make clear which confounders were adjusted for and why they were included

Table 3

**Table 1 Unadjusted and adjusted regression results for five ulcer-healing endpoints against fasting capillary blood sugar**

| Ulcer outcome                                     | Adjustment status | Change in outcome per 1 mmol/L increase in FCBS |                 | Equivalent effect size | P        |
|---------------------------------------------------|-------------------|-------------------------------------------------|-----------------|------------------------|----------|
|                                                   |                   | Estimate                                        | 95% CI          |                        |          |
| Ulcer area (cm <sup>2</sup> ) †                   | Unadjusted        | 0.010                                           | [-0.041,0.062]  | 0.004                  | 0.69     |
|                                                   | Adjusted§         | 0.004                                           | [-0.024,0.032]  | 0.001                  | 0.77     |
| Log(ulcer area+0.01) †                            | Unadjusted        | 0.134                                           | [0.049,0.214]   | 0.10                   | 0.002 ** |
|                                                   | Adjusted§         | 0.114                                           | [0.020,0.194]   | 0.08                   | 0.0145 * |
| Rate of absolute change (cm <sup>2</sup> /week) † | Unadjusted        | 0.011                                           | [-0.018, 0.041] | 0.01                   | 0.45     |
|                                                   | Adjusted¶         | 0.011                                           | [-0.019,0.041]  | 0.01                   | 0.69     |
| Rate of relative change (%/week <sup>-1</sup> ) † | Unadjusted        | 5.7                                             | [1.1, 10.3]     | 0.06                   | 0.015 *  |
|                                                   | Adjusted¶         | 5.7                                             | [1.1,10.3]      | 0.06                   | 0.015 *  |
| Hazard ratio‡                                     | Unadjusted        | 0.90                                            | [0.74,1.10]     | N/A                    | 0.31     |
|                                                   | Adjusted † †      | 0.88                                            | [0.71,1.08]     | N/A                    | 0.21     |

† Mixed linear regression, additive change reported ‡ Cox regression, multiplicative change reported  
 § Adjusted for baseline value and time since Visit 1. ¶ Adjusted for time since Visit 1 only.  
 † † Adjusted for baseline ulcer area  
 FCBS: fasting capillary blood sugar; CI: confidence interval

(b) Report category boundaries when continuous variables were categorized

*Not applicable.*

|                   |    |                                                                                                                  |    |                                                                                                                                                                                                                                                                                                                                                                                                                                                                                                                                                                                  |
|-------------------|----|------------------------------------------------------------------------------------------------------------------|----|----------------------------------------------------------------------------------------------------------------------------------------------------------------------------------------------------------------------------------------------------------------------------------------------------------------------------------------------------------------------------------------------------------------------------------------------------------------------------------------------------------------------------------------------------------------------------------|
|                   |    | (c) If relevant, consider translating estimates of relative risk into absolute risk for a meaningful time period | 11 | <p><i>Substudy 1:</i></p> <p>The A-to-B rate ratio of eligibility to a full study, however, was 4.1 (95% CI 1.8-9.2). The eligibility rate in period B was 0.45 participant per week (95% CI 0.24-0.77).</p>                                                                                                                                                                                                                                                                                                                                                                     |
| Other analyses    | 17 | Report other analyses done—eg analyses of subgroups and interactions, and sensitivity analyses                   |    | <i>Not applicable.</i>                                                                                                                                                                                                                                                                                                                                                                                                                                                                                                                                                           |
| <b>Discussion</b> |    |                                                                                                                  |    |                                                                                                                                                                                                                                                                                                                                                                                                                                                                                                                                                                                  |
| Key results       | 18 | Summarise key results with reference to study objectives                                                         | 10 | This feasibility study showed that by using less stringent entry criteria, more people with diabetic foot ulcers attending our foot clinic (30%) may be eligible for a proposed RCT investigating the efficacy of an intensive insulin regimen on diabetic foot ulcer healing than reported in a previous feasibility study (0.5% [1/200]) 19. The study also showed that the primary endpoint of log(ulcer area+0.01), with ulcer area measured using digital photographic planimetry, may be sensitive enough to glycaemic control to base an RCT on in this population.       |
| Limitations       | 19 | Discuss limitations of the study, taking into account sources of potential bias or imprecision.                  | 11 | <p><i>(No biasing issue was identified, but see 21.)</i></p> <p>Some limitations temper the interpretation of our results. Firstly, Substudy 2 did not reach the target sample size of 20. This shortfall was largely due to availability of personnel and funder timelines. These issues, particularly around staffing, have the potential to affect any future RCT. Moreover, the study was conducted at a single centre in New Zealand, limiting generalisability to other populations and settings with different care pathways for diabetes and diabetic complications.</p> |

1  
2  
3  
4  
5  
6  
7  
8  
9  
10  
11  
12  
13  
14  
15  
16  
17  
18  
19  
20  
21  
22  
23  
24  
25  
26  
27  
28  
29  
30  
31  
32  
33  
34  
35  
36  
37  
38  
39  
40  
41  
42  
43  
44  
45  
46

|                          |    |                                                                                                                                                                            |    |                                                                                                                                                                                                                                                                                                                                                                                                                  |
|--------------------------|----|----------------------------------------------------------------------------------------------------------------------------------------------------------------------------|----|------------------------------------------------------------------------------------------------------------------------------------------------------------------------------------------------------------------------------------------------------------------------------------------------------------------------------------------------------------------------------------------------------------------|
|                          |    | Discuss both direction and magnitude of any potential bias                                                                                                                 |    |                                                                                                                                                                                                                                                                                                                                                                                                                  |
| Interpretation           | 20 | Give a cautious overall interpretation of results considering objectives, limitations, multiplicity of analyses, results from similar studies, and other relevant evidence | 16 | The study has produced evidence of moderate quality that tight glycaemic control may be beneficial for ulcer healing, and that an outcome derived from ulcer area could be sensitive to glycaemic control as expressed by FCBS. However, we have also demonstrated that a reasonably powered trial would require the involvement of a large number of centres, increasing the complexity of such an undertaking. |
| Generalisability         | 21 | Discuss the generalisability (external validity) of the study results                                                                                                      | 16 | [...] [T]he study was conducted at a single centre in New Zealand, limiting generalisability to other populations and settings with different care pathways for diabetes and diabetic complications.                                                                                                                                                                                                             |
| <b>Other information</b> |    |                                                                                                                                                                            |    |                                                                                                                                                                                                                                                                                                                                                                                                                  |
| Funding                  | 22 | Give the source of funding and the role of the funders for the present study and, if                                                                                       | 17 | <b>Funding</b> This work was supported by the Health Research Council of New Zealand's Feasibility Study grant number 14/605.                                                                                                                                                                                                                                                                                    |

---

applicable, for  
the original  
study on which  
the present  
article is based

---

\*Give information separately for cases and controls in case-control studies and, if applicable, for exposed and unexposed groups in cohort and cross-sectional studies.

**Note:** An Explanation and Elaboration article discusses each checklist item and gives methodological background and published examples of transparent reporting. The STROBE checklist is best used in conjunction with this article (freely available on the Web sites of PLoS Medicine at <http://www.plosmedicine.org/>, Annals of Internal Medicine at <http://www.annals.org/>, and Epidemiology at <http://www.epidem.com/>). Information on the STROBE Initiative is available at [www.strobe-statement.org](http://www.strobe-statement.org).
